# Supplementary material
Source: Research Square preprint supplement (doi:10.21203/rs.3.rs-9696300/v1)
Supplement: Supplementary file 1 [file 4e51317b22bf8be743cdc3a9.docx]

**Supplementary Figure 1 – Response statistics for psychometric items**

***Supplementary Figure 1*** *— Standardized response metrics across all psychometric items (318 total).* ***a)*** *Response means.* ***b)*** *Response standard deviation.* ***c)*** *Response skewness.* ***d)*** *Response kurtosis (scale truncated for visualization, see Supplementary Table 3).* ***e)*** *Proportion of participants responding at minimum.* ***f)*** *Proportion of participants responding at maximum.*


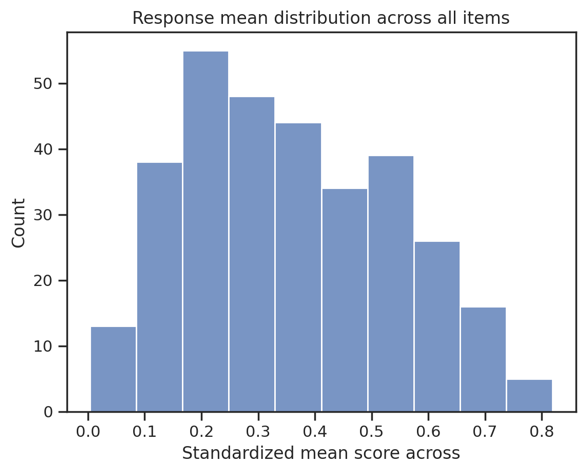

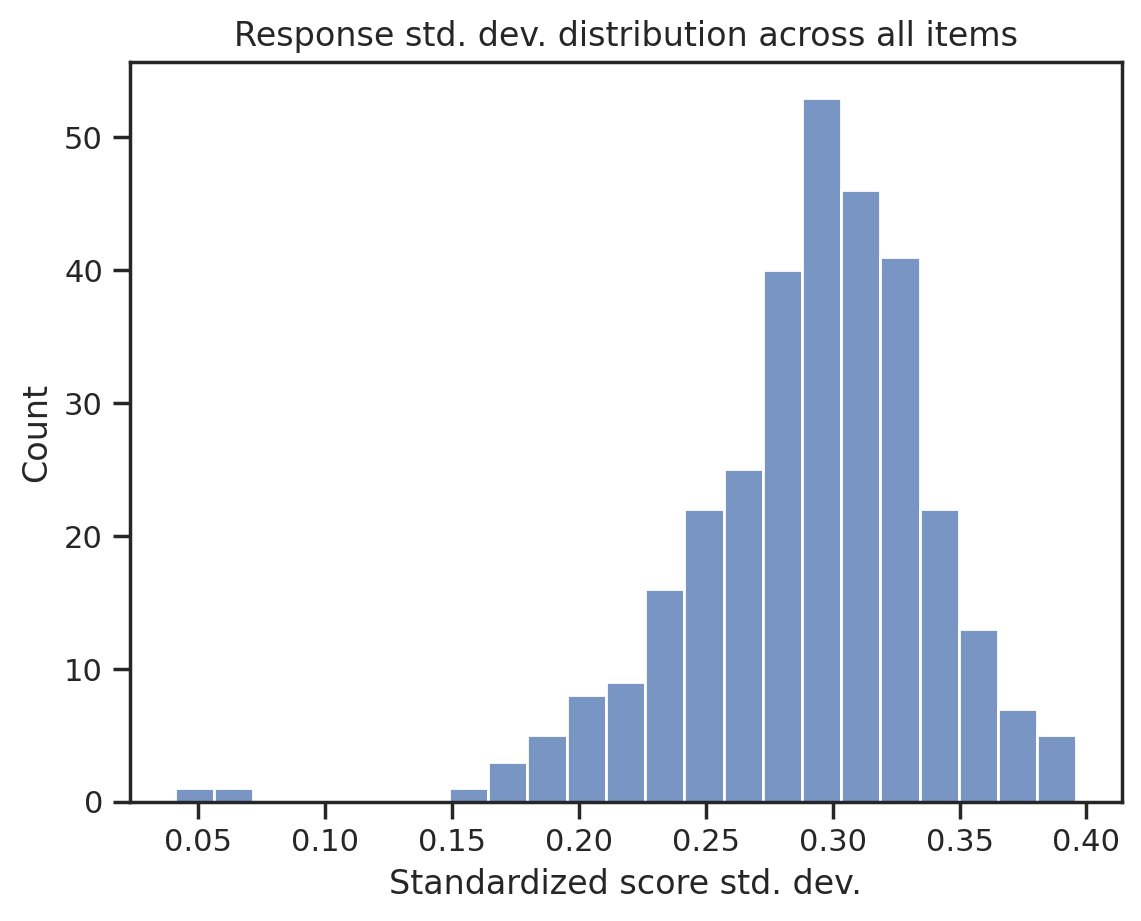

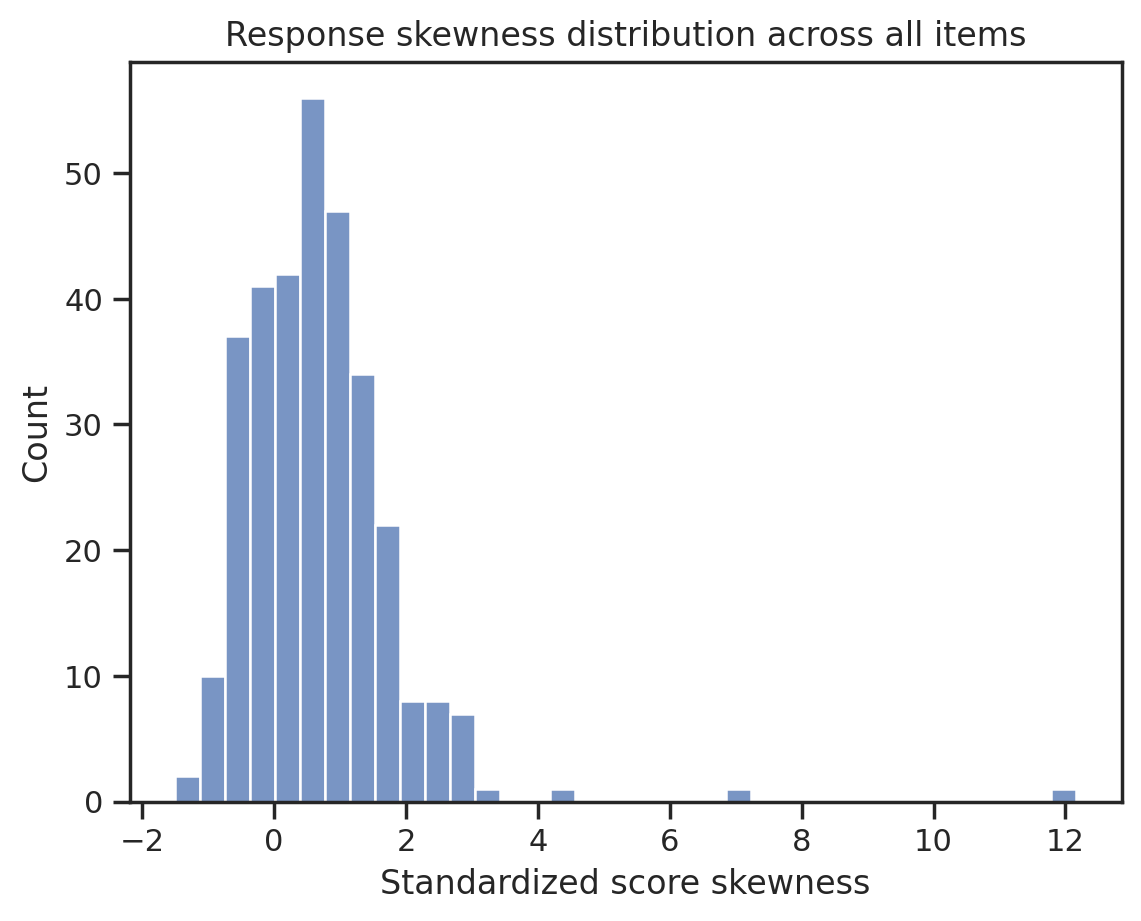

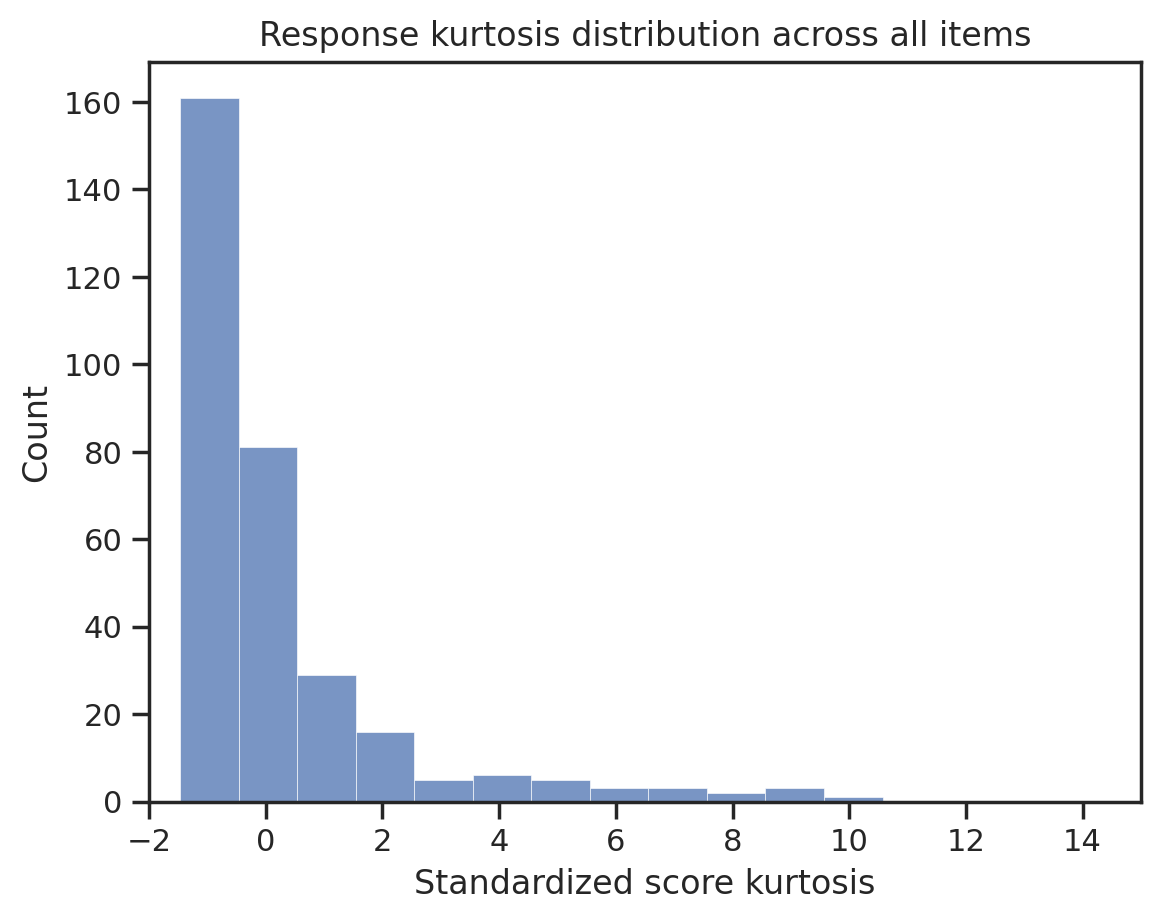

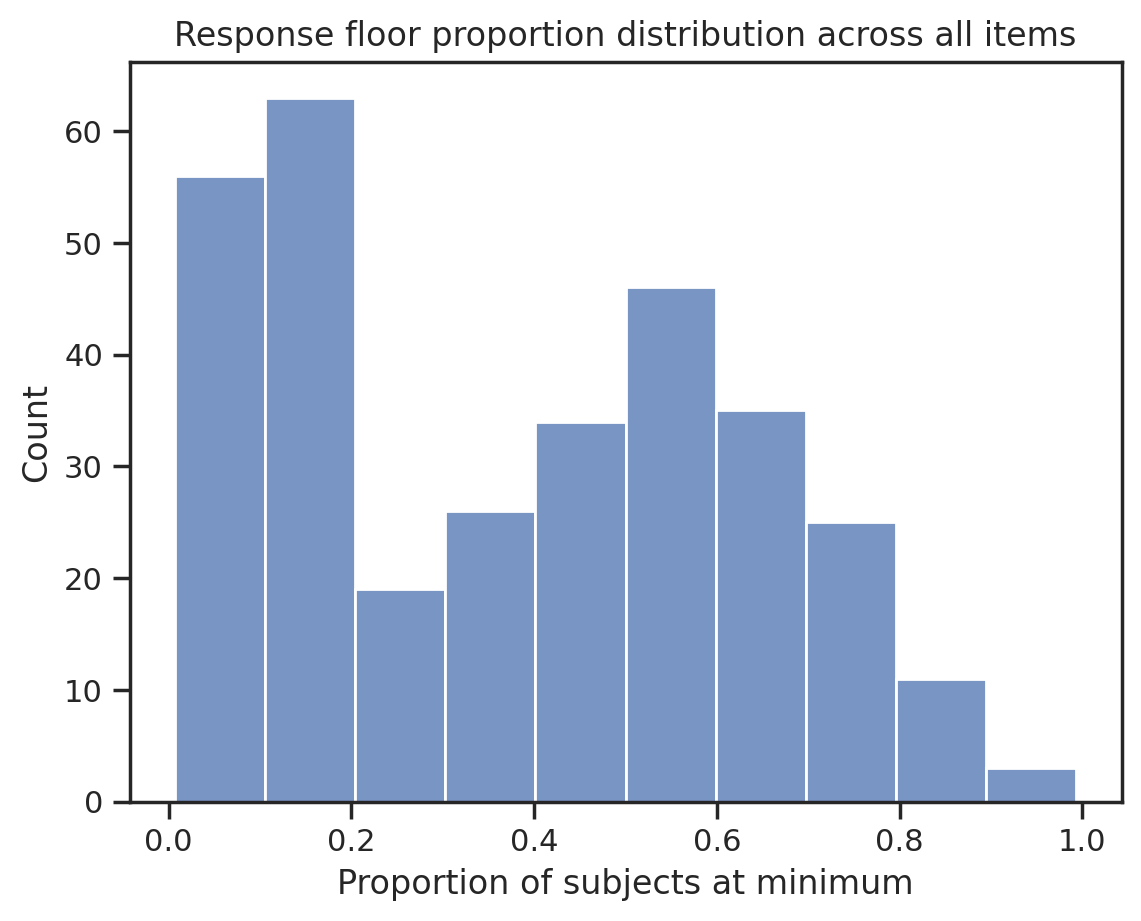


**a)**

**b)**

**c)**

**d)**

**e)**


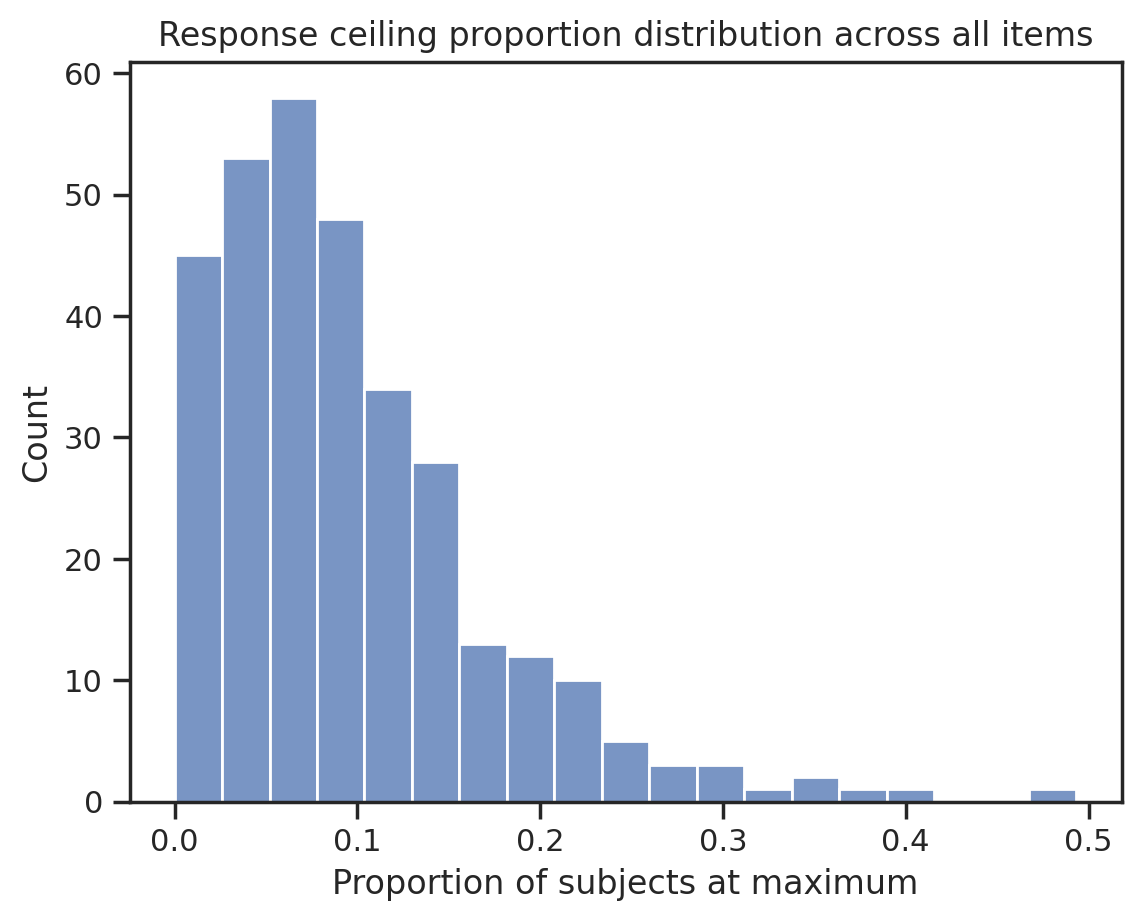


**f)**

**Supplementary Figure 2 – Functional connectivity predictive power not driven by item response variation using either whole-brain or functional networks**


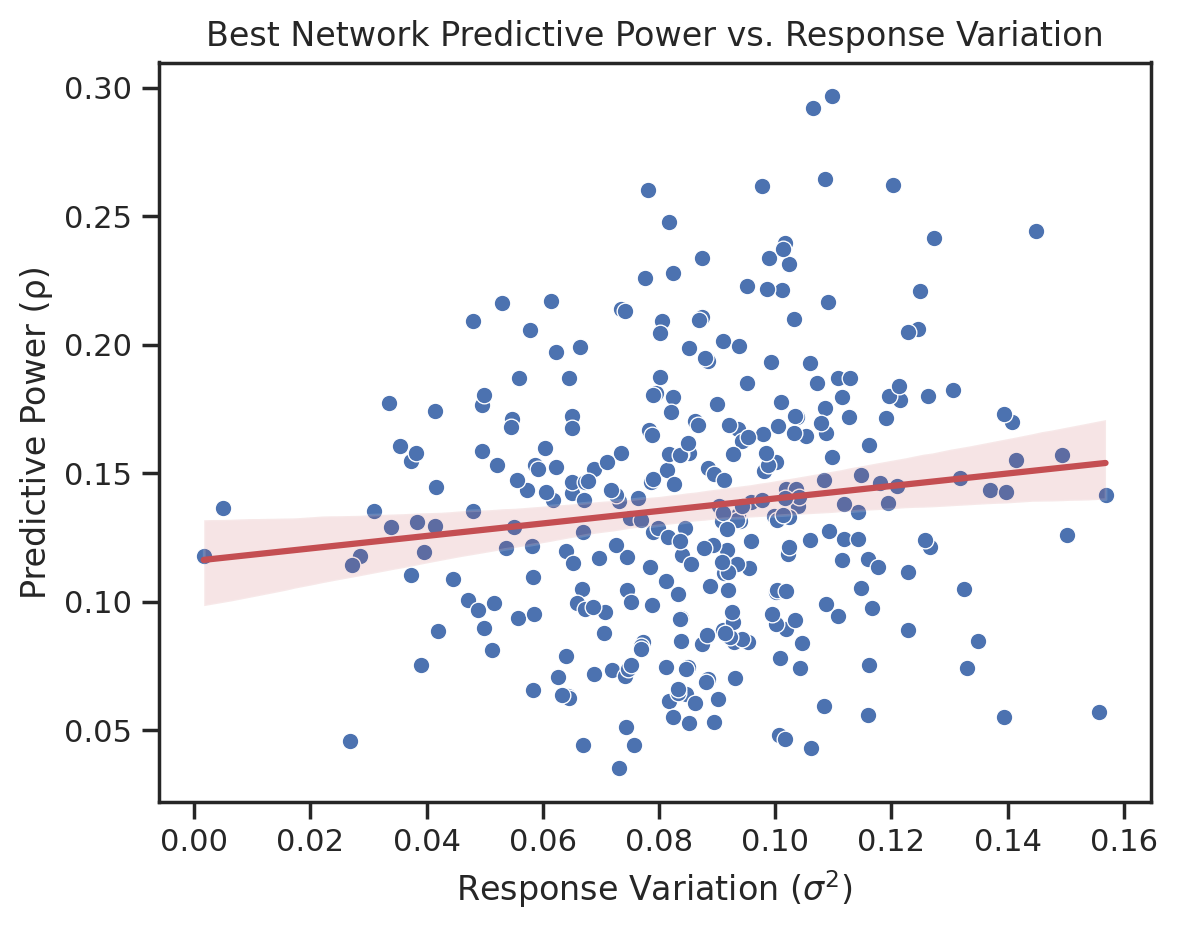

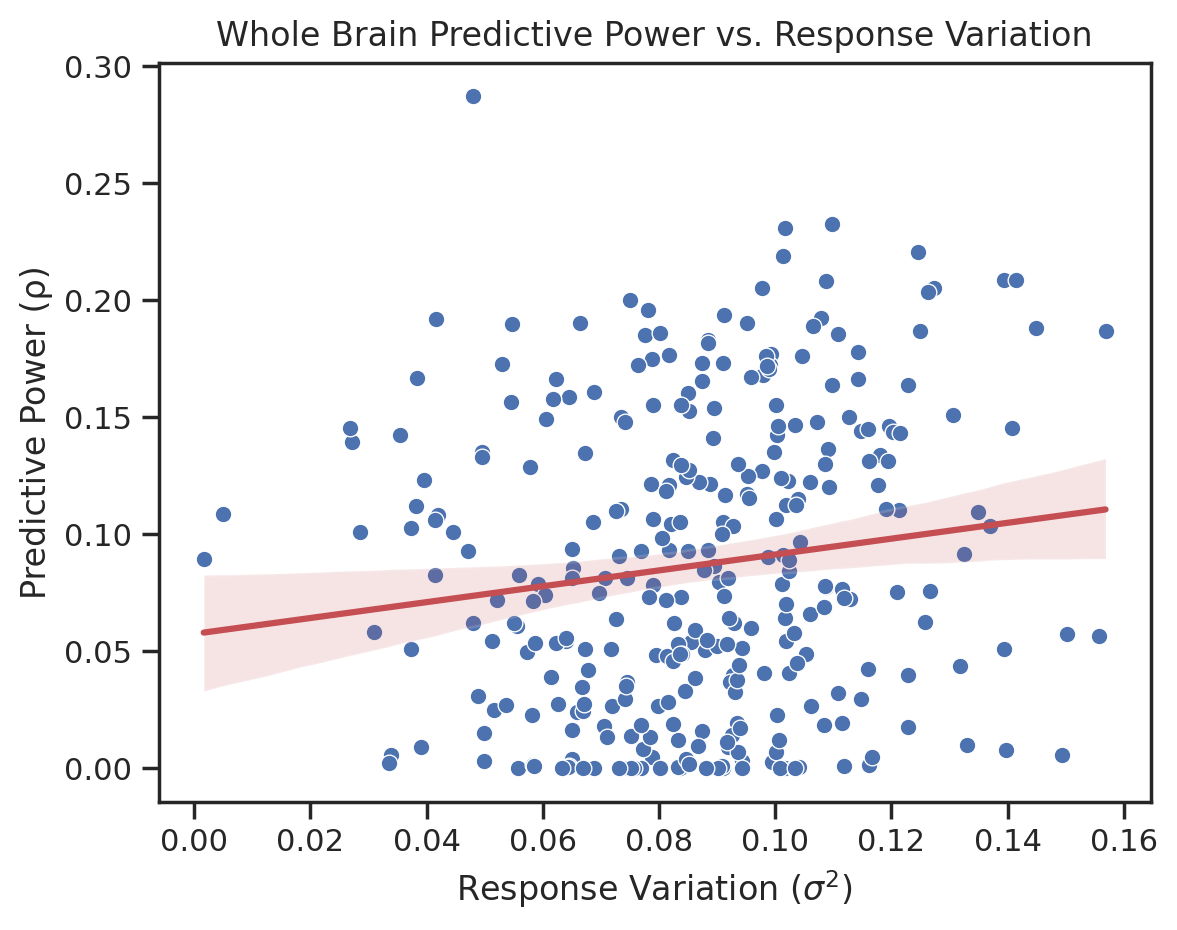


*r2 = 0.02*

*r2 = 0.02*

**b)**

**a)**

***Supplementary Figure 2 —*** *Correlation of psychometric item response variation with kernel ridge regression (KRR) predictive power.* ***a)*** *Best-network predictive power as a function of score variation for each item.* ***b)*** *Whole-brain predictive power as a function of score variation for each item. Correlation strength reported as the coefficient of determination (r2).*

**Supplementary Figure 3 – Functional connectivity predictive power not driven by item response statistics using either whole-brain or functional networks**


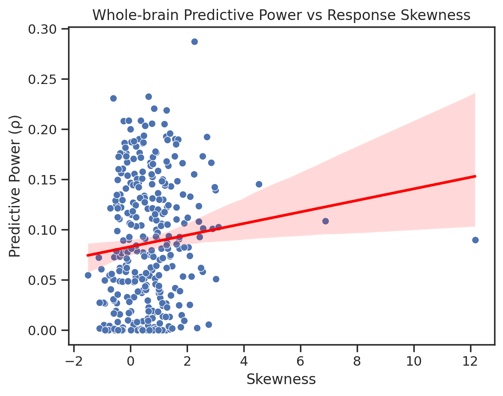

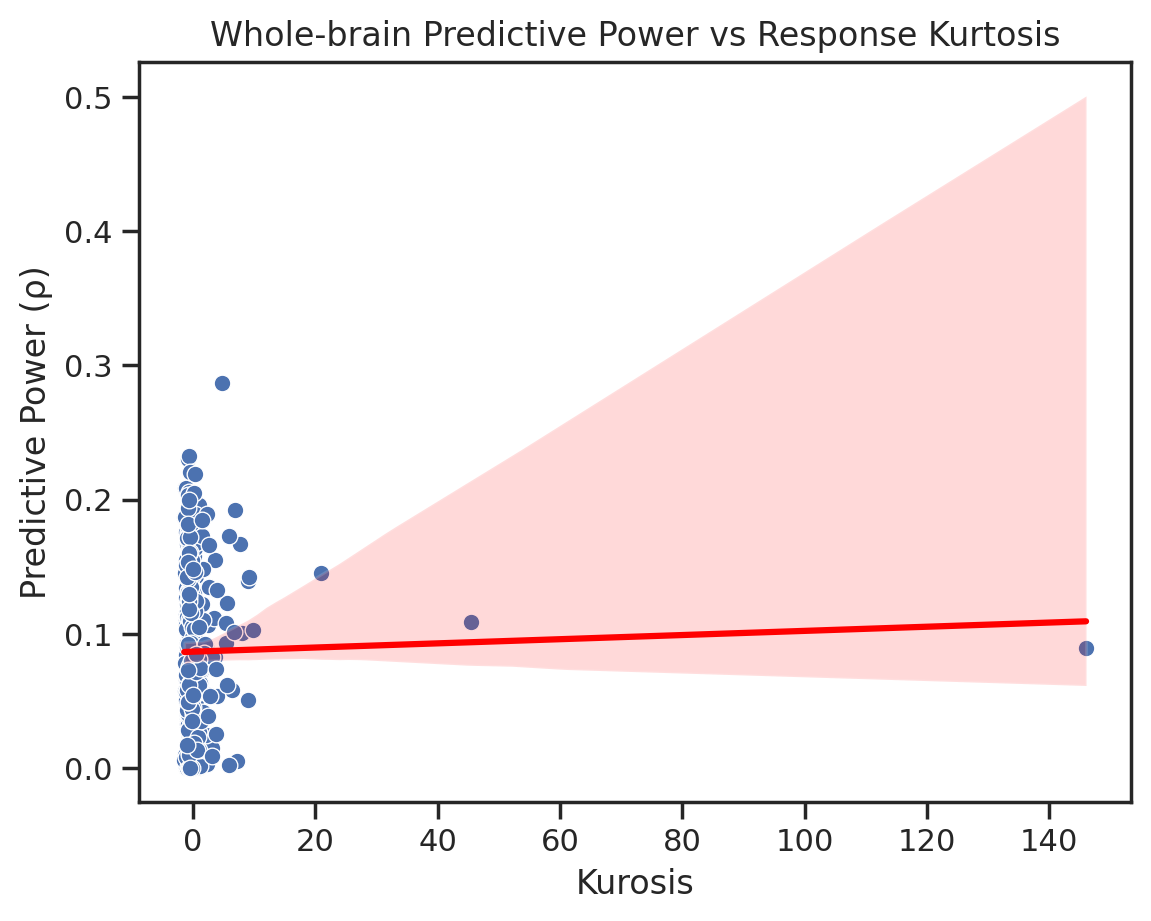

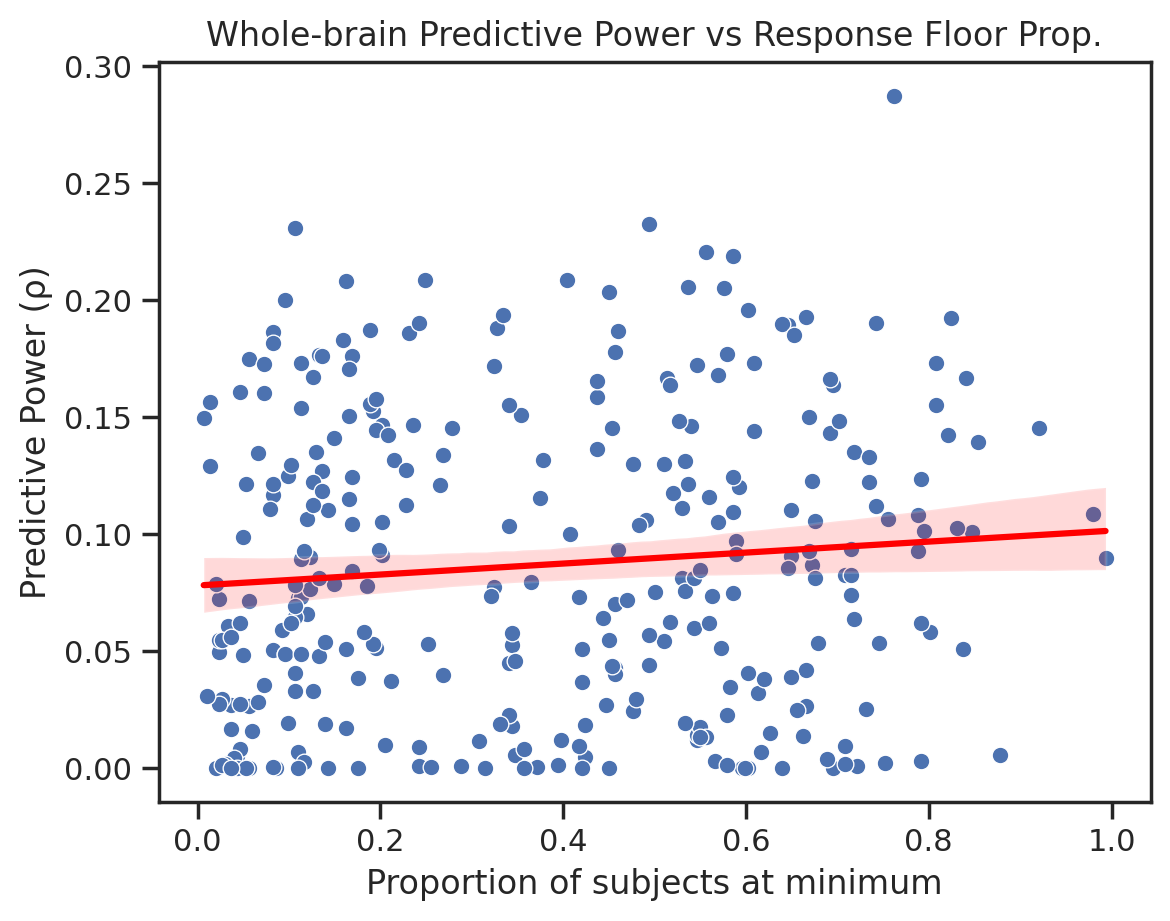

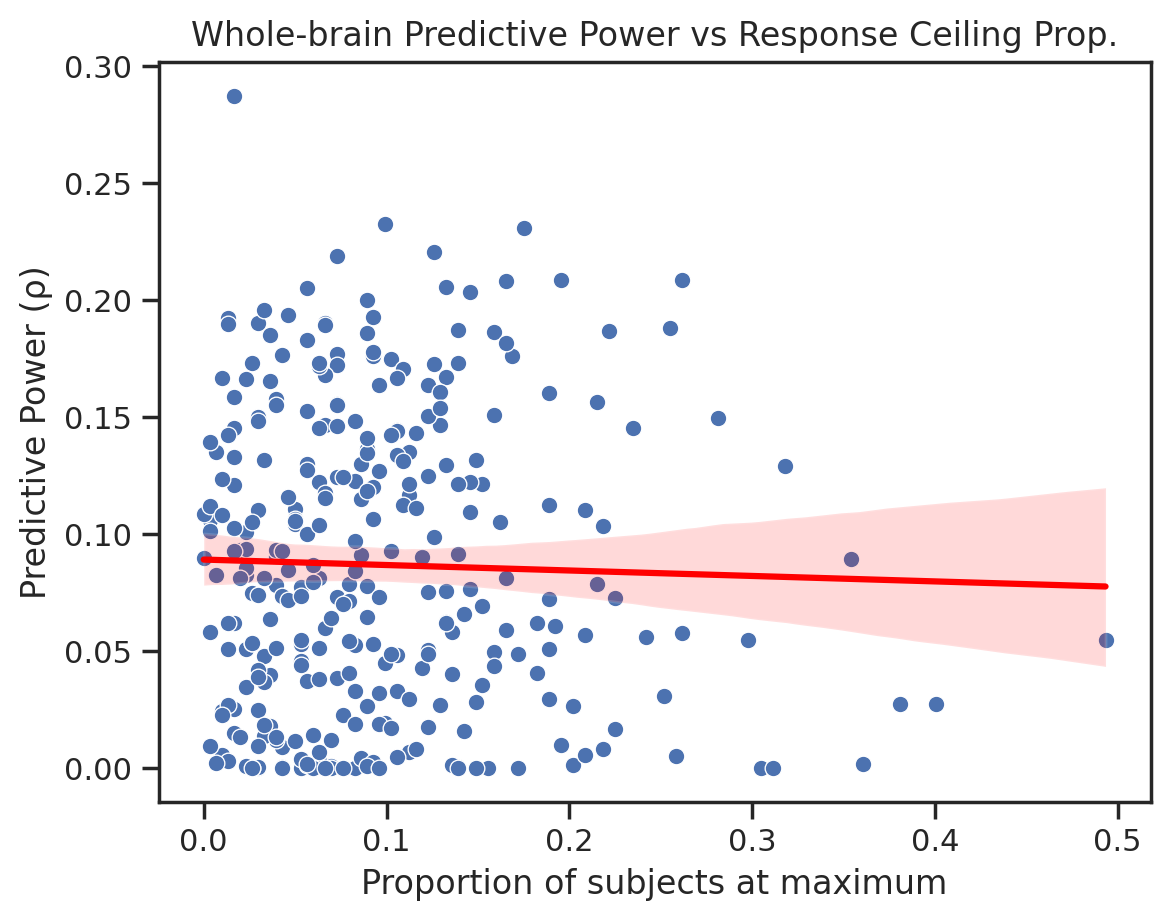

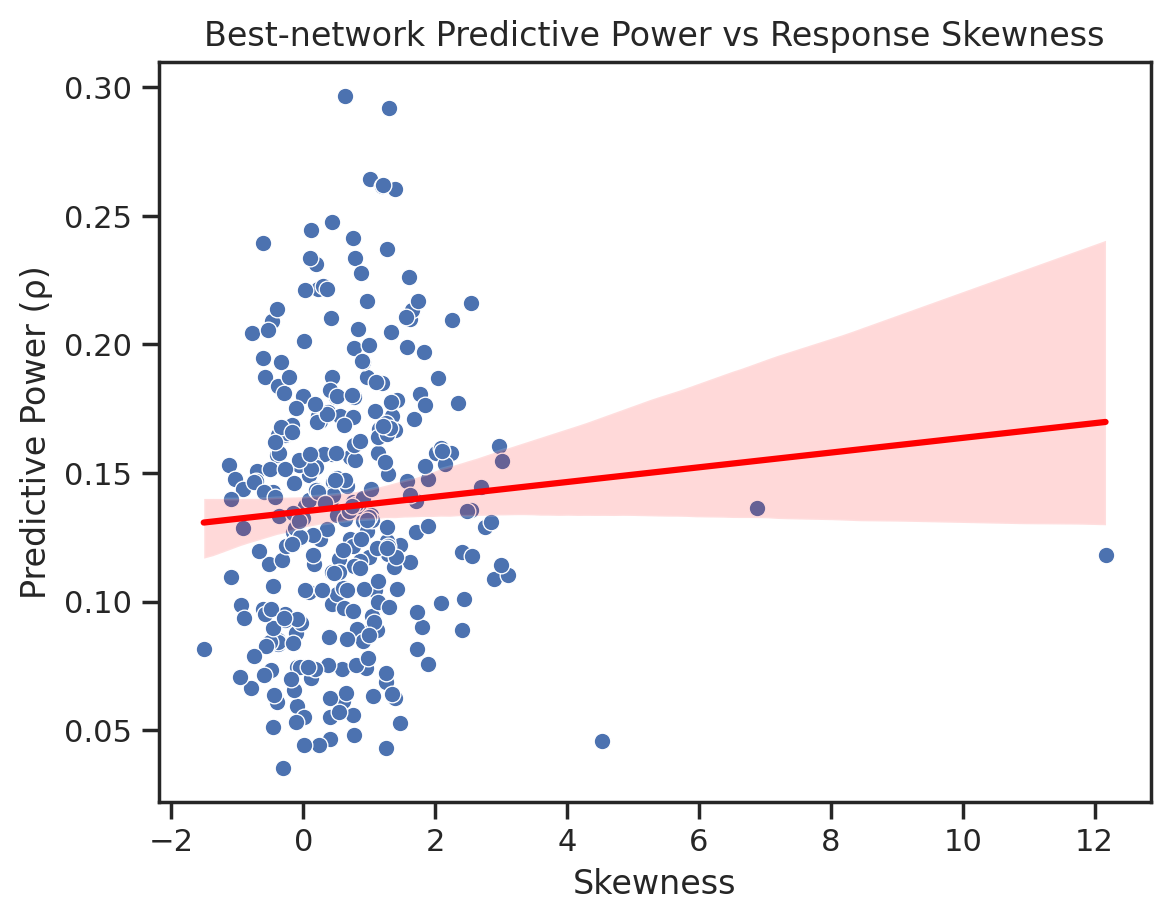

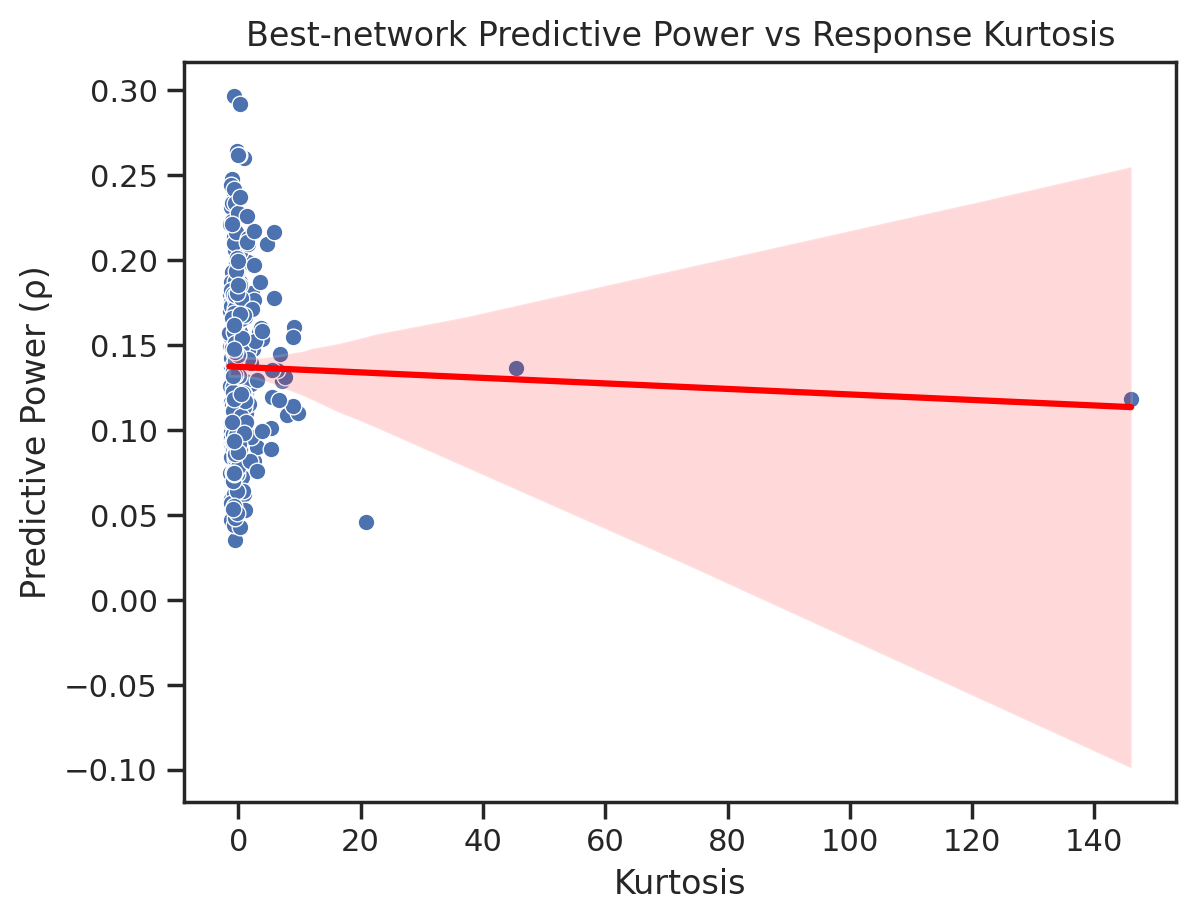

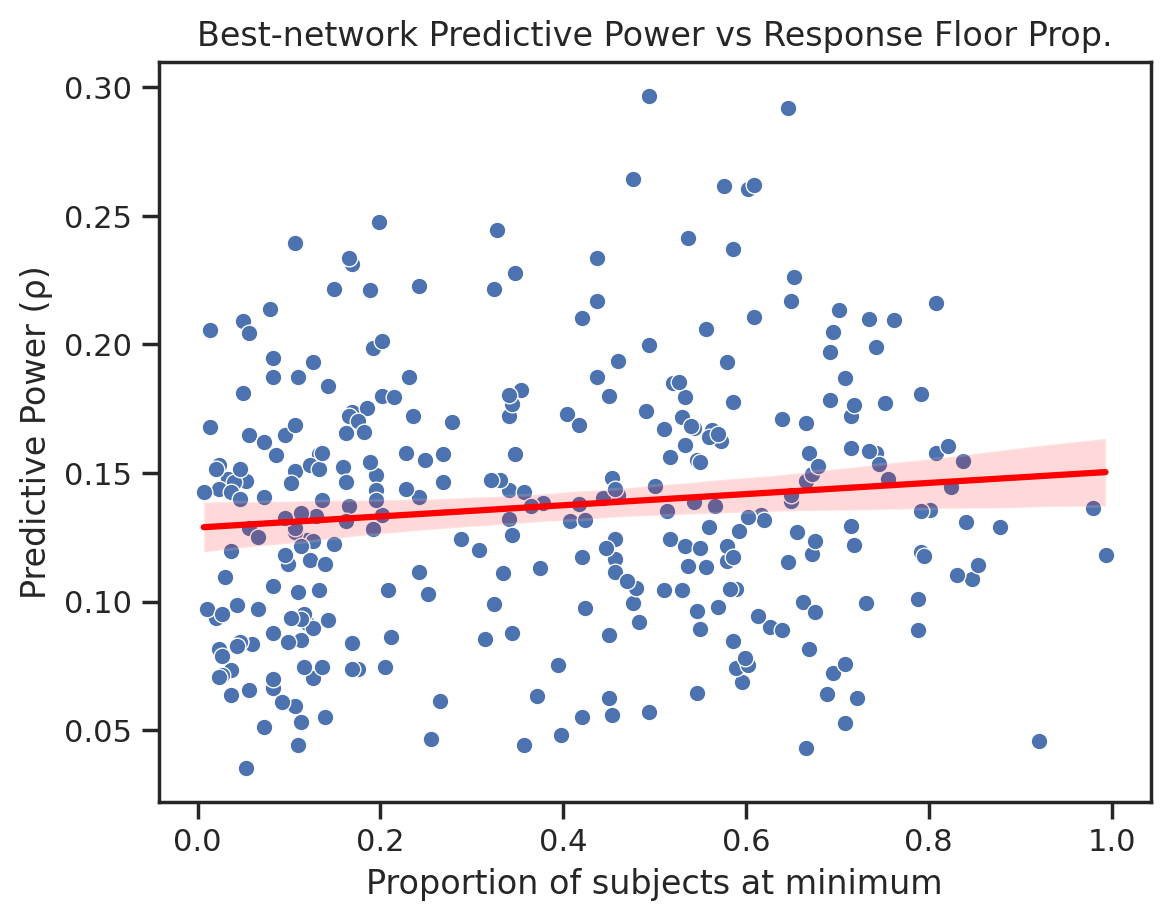

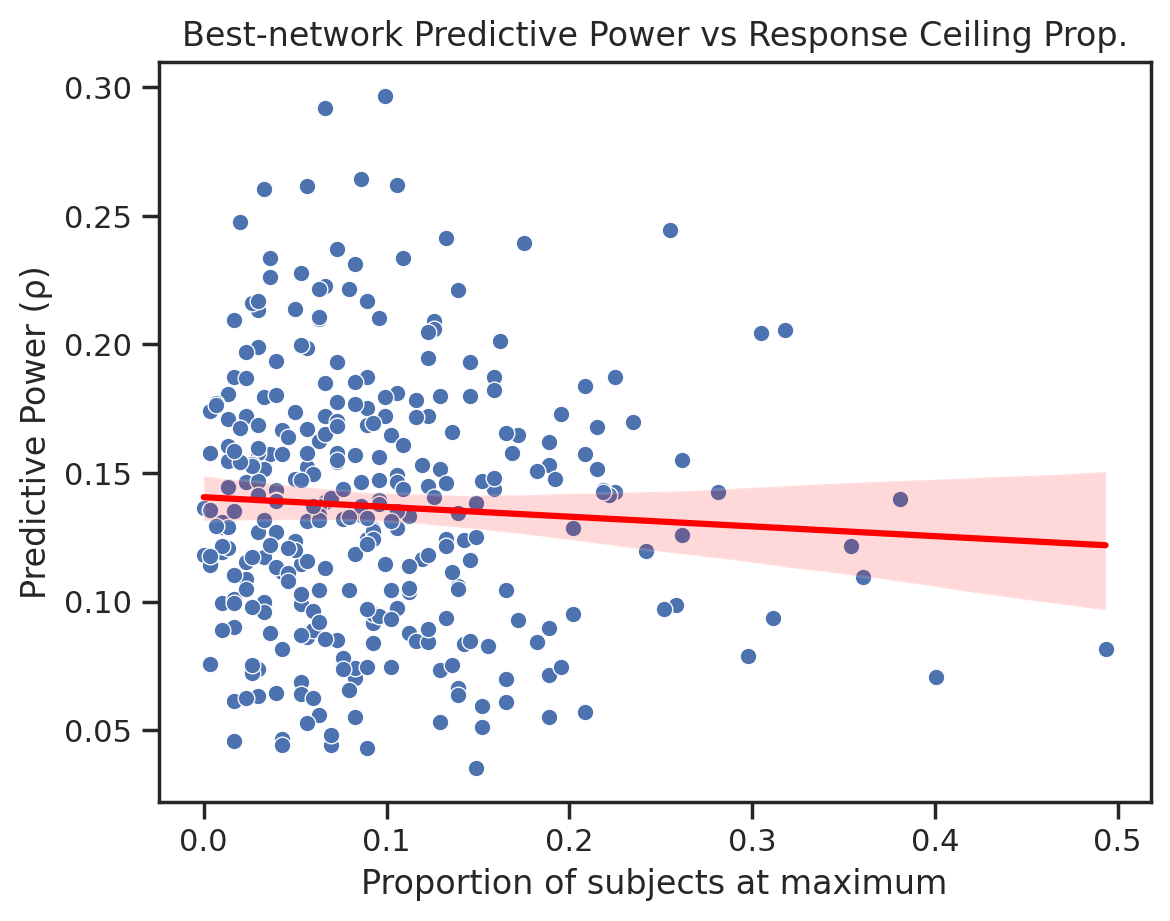


**a)**

**b)**

**c)**

**d)**

*r2 < 0.01*

*r2 < 0.01*

*r2 < 0.01*

*r2 < 0.01*

*r2 < 0.01*

*r2 < 0.01*

*r2 < 0.01*

*r2 = 0.03*

***Supplementary Figure 3 —*** *Kernel Ridge Regression (KRR) predictive power relationships with psychometric item response statistics for whole-brain and best-network predictions.* ***a)*** *Response skewness versus whole-brain and best-network predictive power for each item.* ***b)*** *Response kurtosis versus predictive power.* ***c)*** *Proportion of participants responding at minimum (floor) value versus predictive power.* ***d)*** *Proportion of participants responding at maximum (ceiling) value versus predictive power.*

**Supplementary Figure 4 – Prediction of symptom-based composite scales improve with more predictable items but not item multicollinearity**

**a)**

**b)**


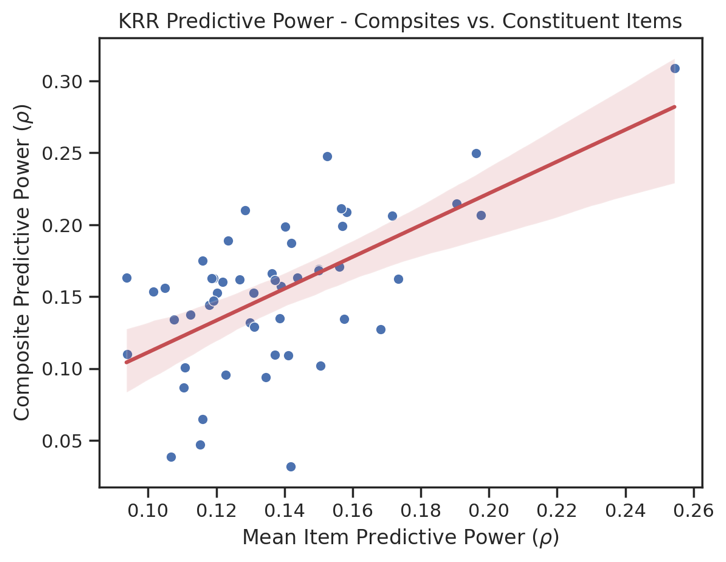


*r2 = 0.38*


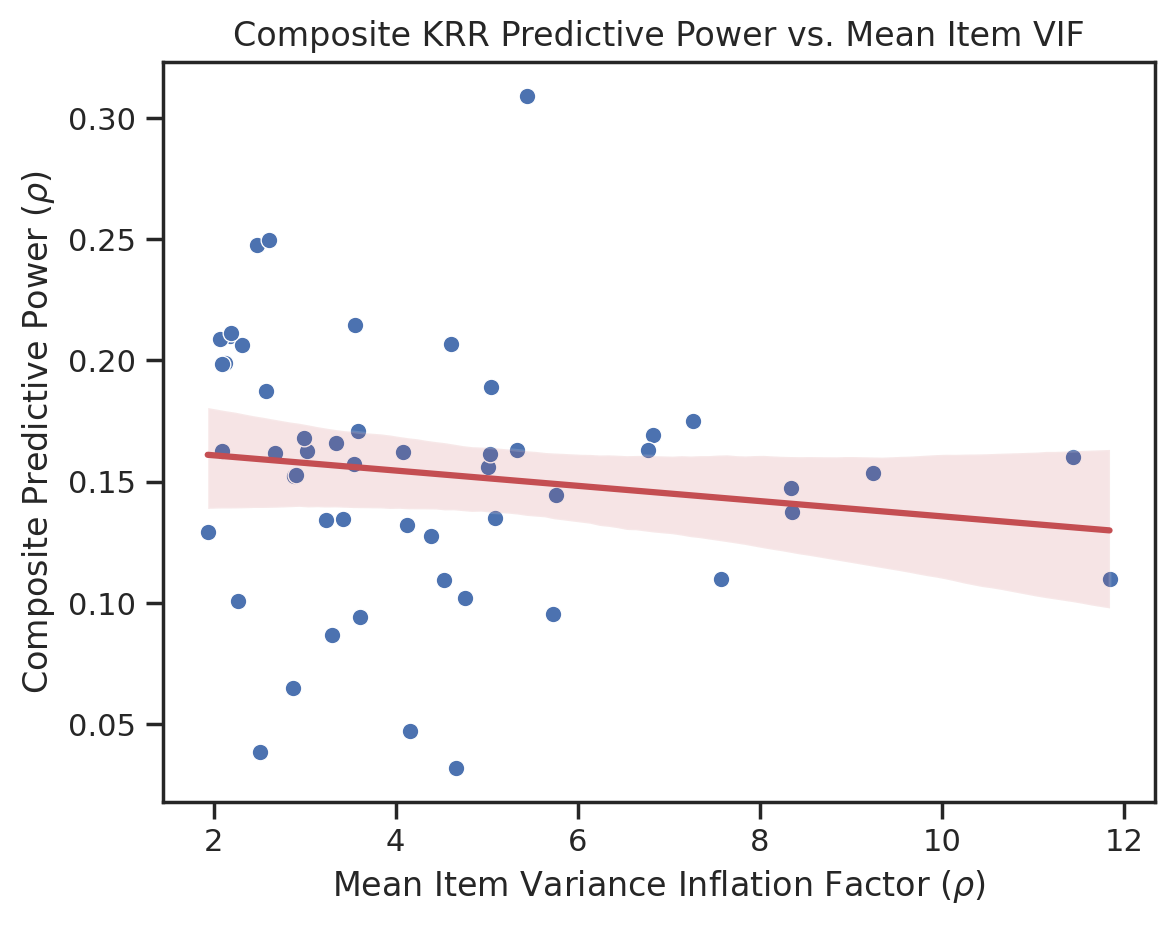


*r2 = 0.19*

***Supplementary Figure 4 —*** *Relationship of symptom-based composite prediction power (best-network) with constituent items statistics. Coefficient of determination reported (r2).* ***a)*** *Power to predict symptom composite scores (best-network) as a function of the mean power to predict across constituent items.* ***b)*** *Best-network power to predict composite scores as a function of constituent item multicollinearity (mean variance inflation factor).*

**Supplementary Figure 5 – Predictive power curves of whole-brain and functional network connectivity across all items**

**
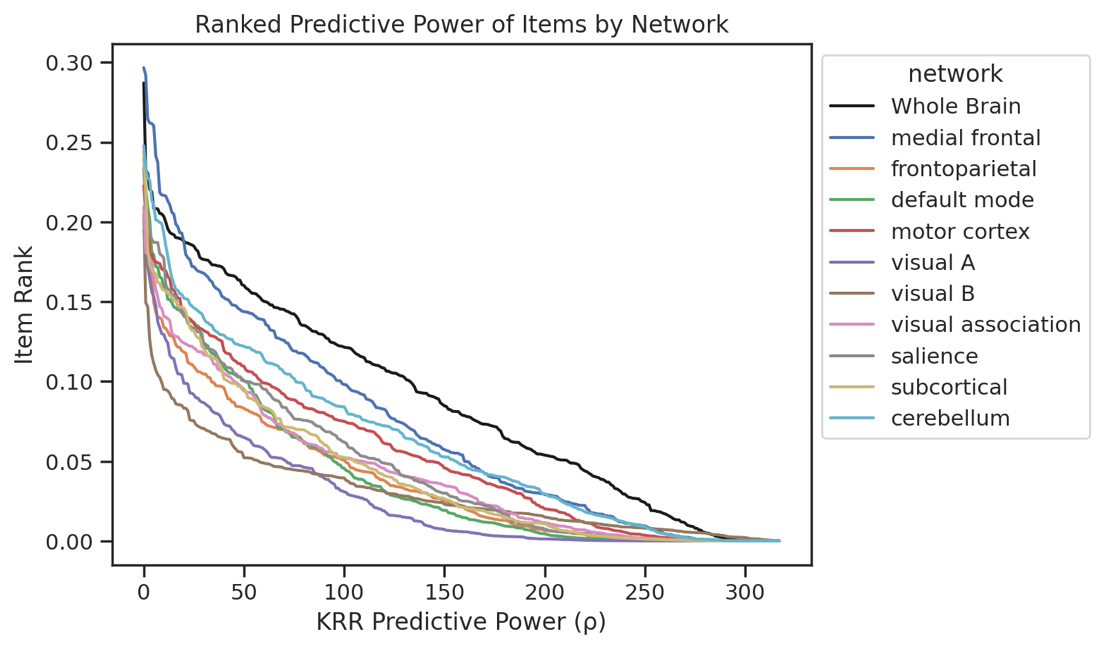
**

Item Rank

KRR predictive power (ρ)

***Supplementary Figure 5 —*** *Kernel ridge regression (KRR) predictive power rank curves for whole-brain and functional network connectivity. Item rank represents the order of items from highest to lowest predictive power on a per-network basis.*

**Supplementary Figure 6 – Ranking of psychometric item predictive power is unique to different functional networks**


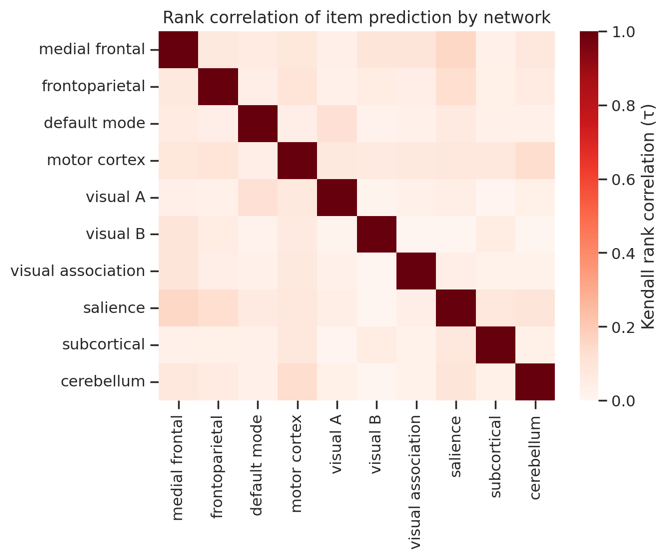

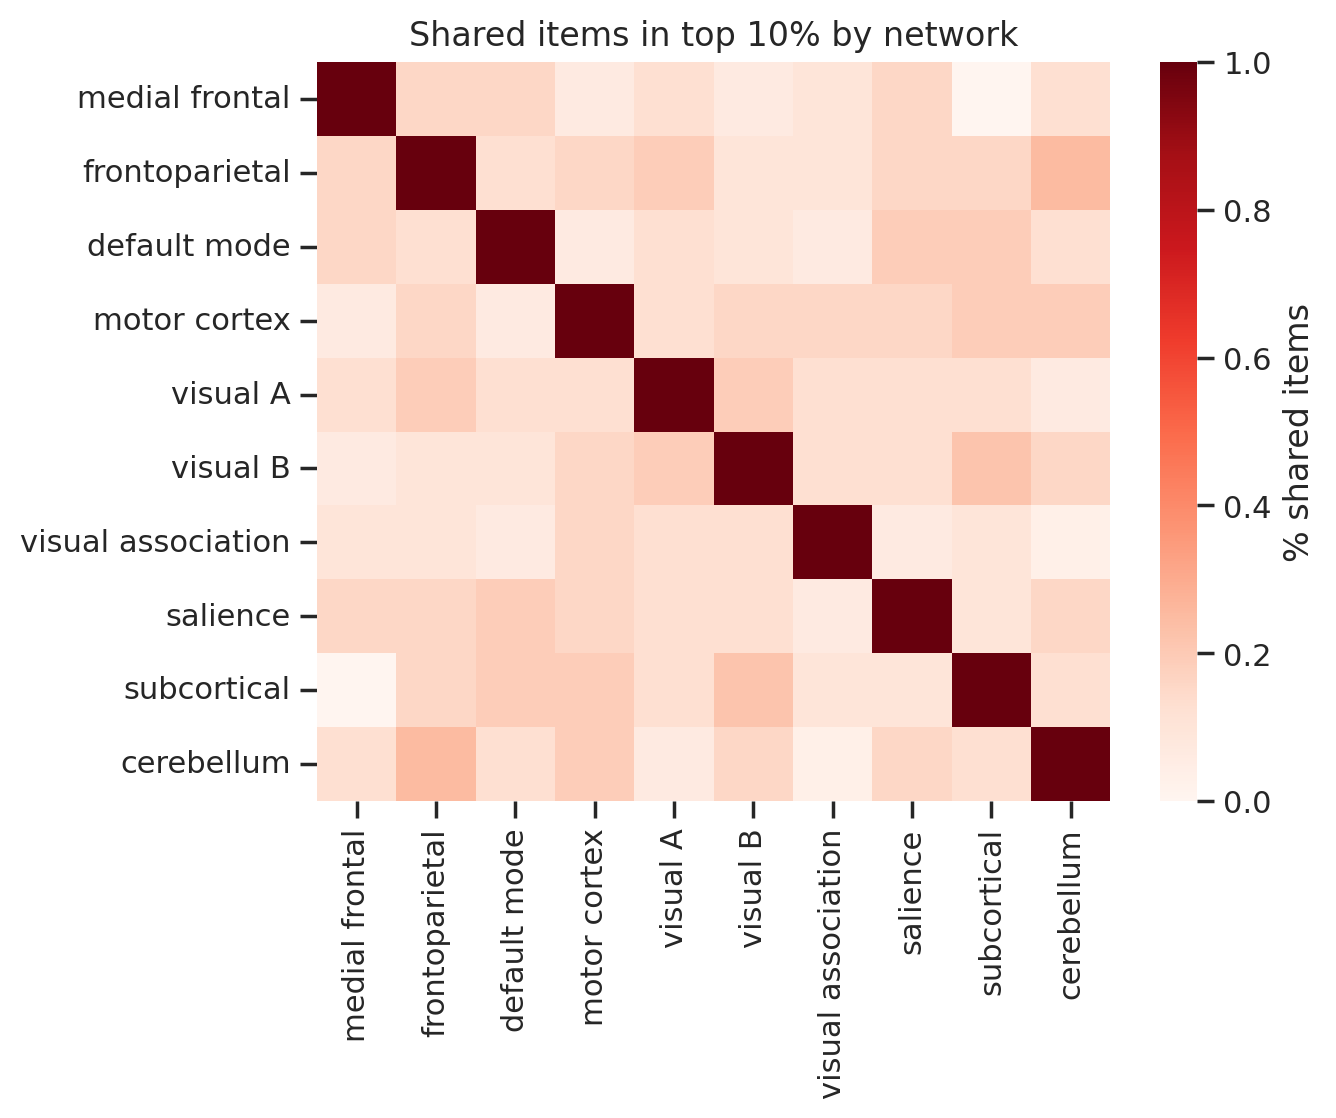

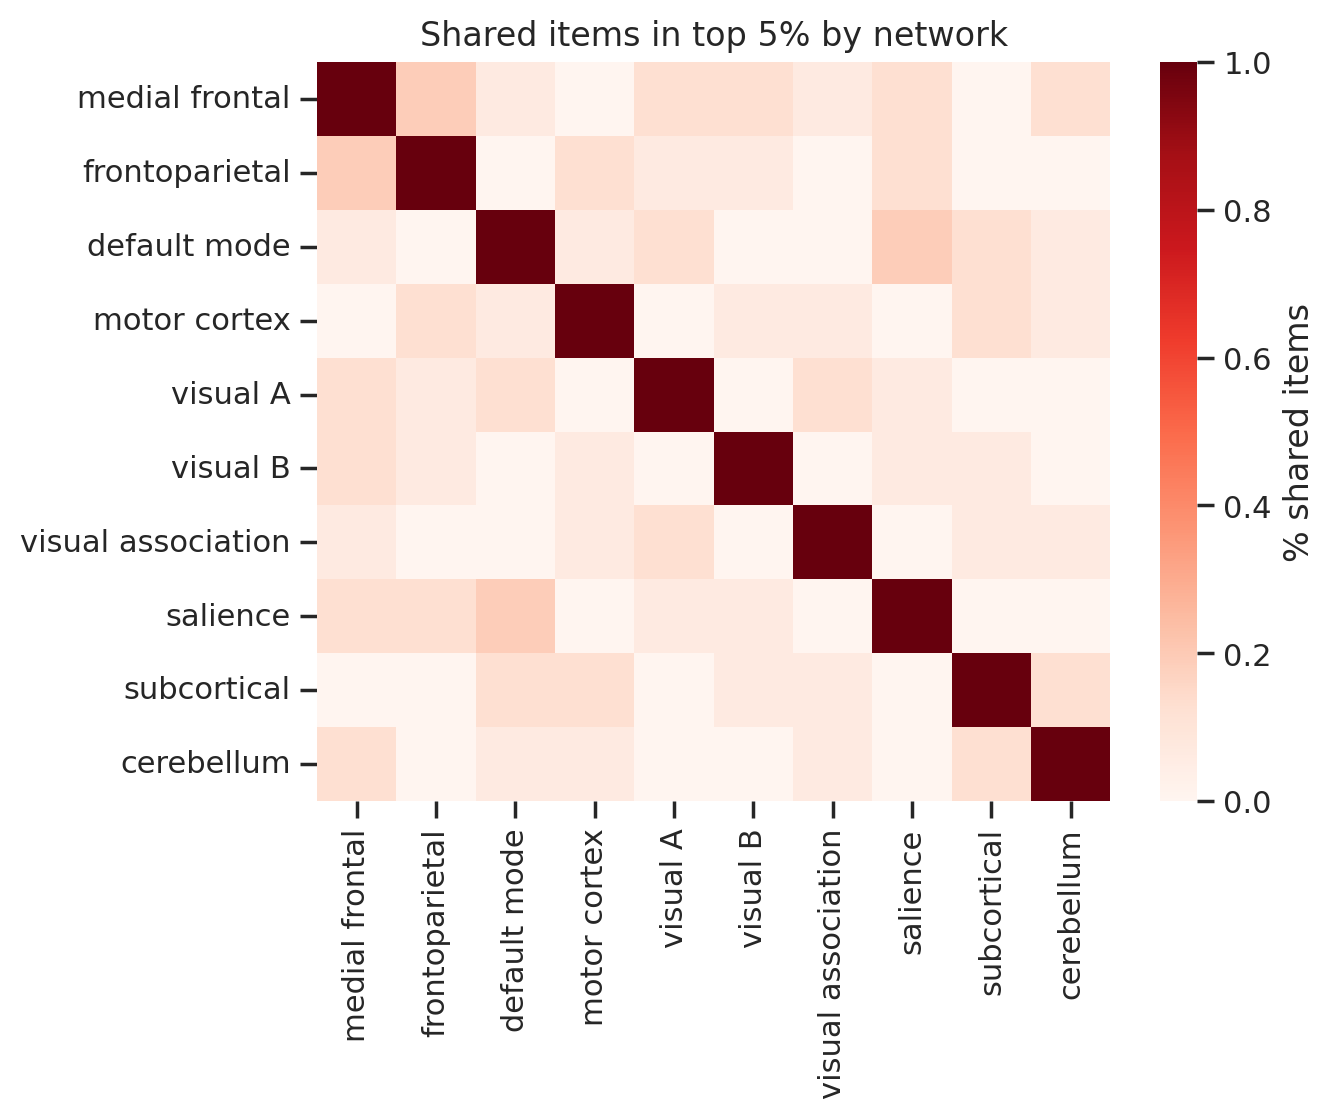


**a)**

**b)**

**c)**

***Supplementary Figure 6*** *— Rank similarity of psychometric item kernel ridge regression (KRR) predictive power across functional networks.* ***a)*** *Pairwise comparison of Kendall’s rank correlation of ranked item predictive power by each functional network.* ***b)*** *Percent of items shared between networks in top 5% highest ranking items by predictive power.* ***c)*** *Percent of items shared between networks in top 10% highest ranking items by predictive power.*

**Supplementary Figure 7 – Predictive power of functional networks on composites constructed from top-ranked items does not improve with item multicollinearity**


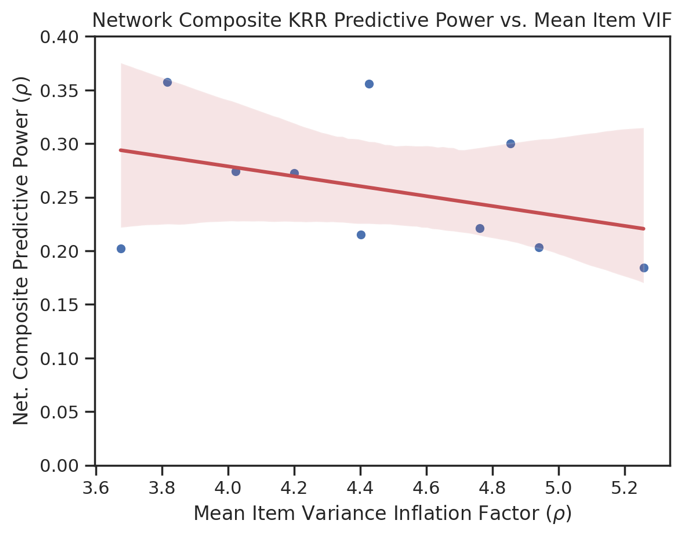


*r*2 = 0.14

***Supplementary Figure 7*** *—**Kernel ridge regression (KRR) predictive power of functional networks to predict network-based composites (aggregated top 10 ranked items) as a function of item multicollinearity (mean variance inflation factor). Correlation strength reported as the coefficient of determination (r2).*

**Supplementary Figure 8 – Pairwise comparison of functional networks predicting composite scores of top-ranked items**


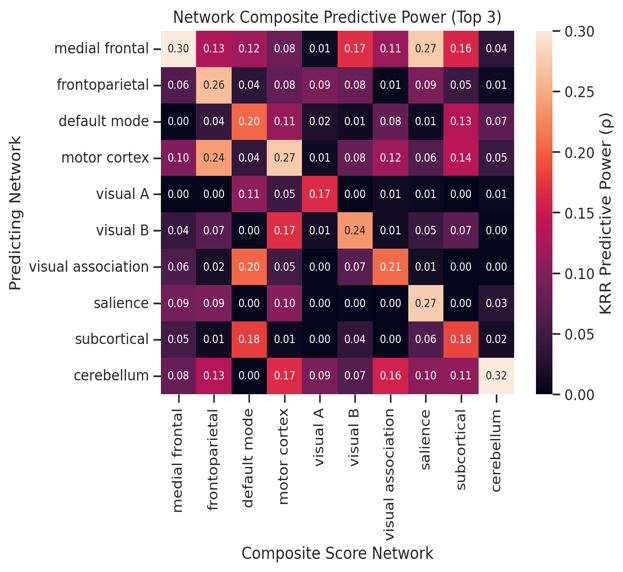

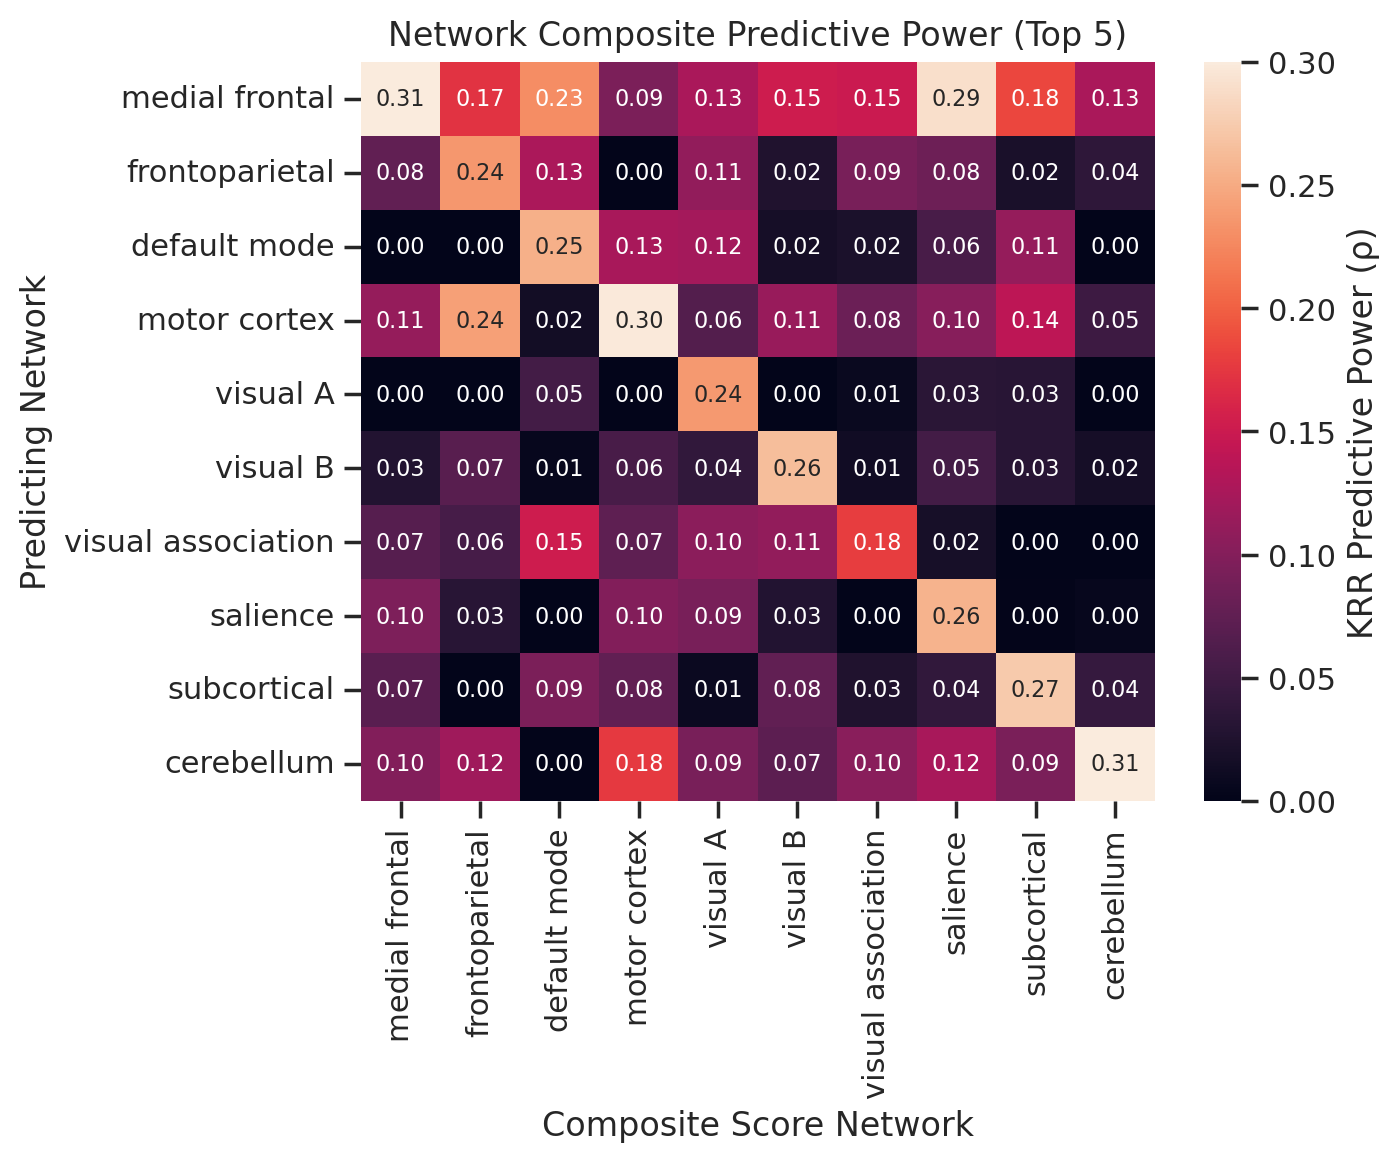

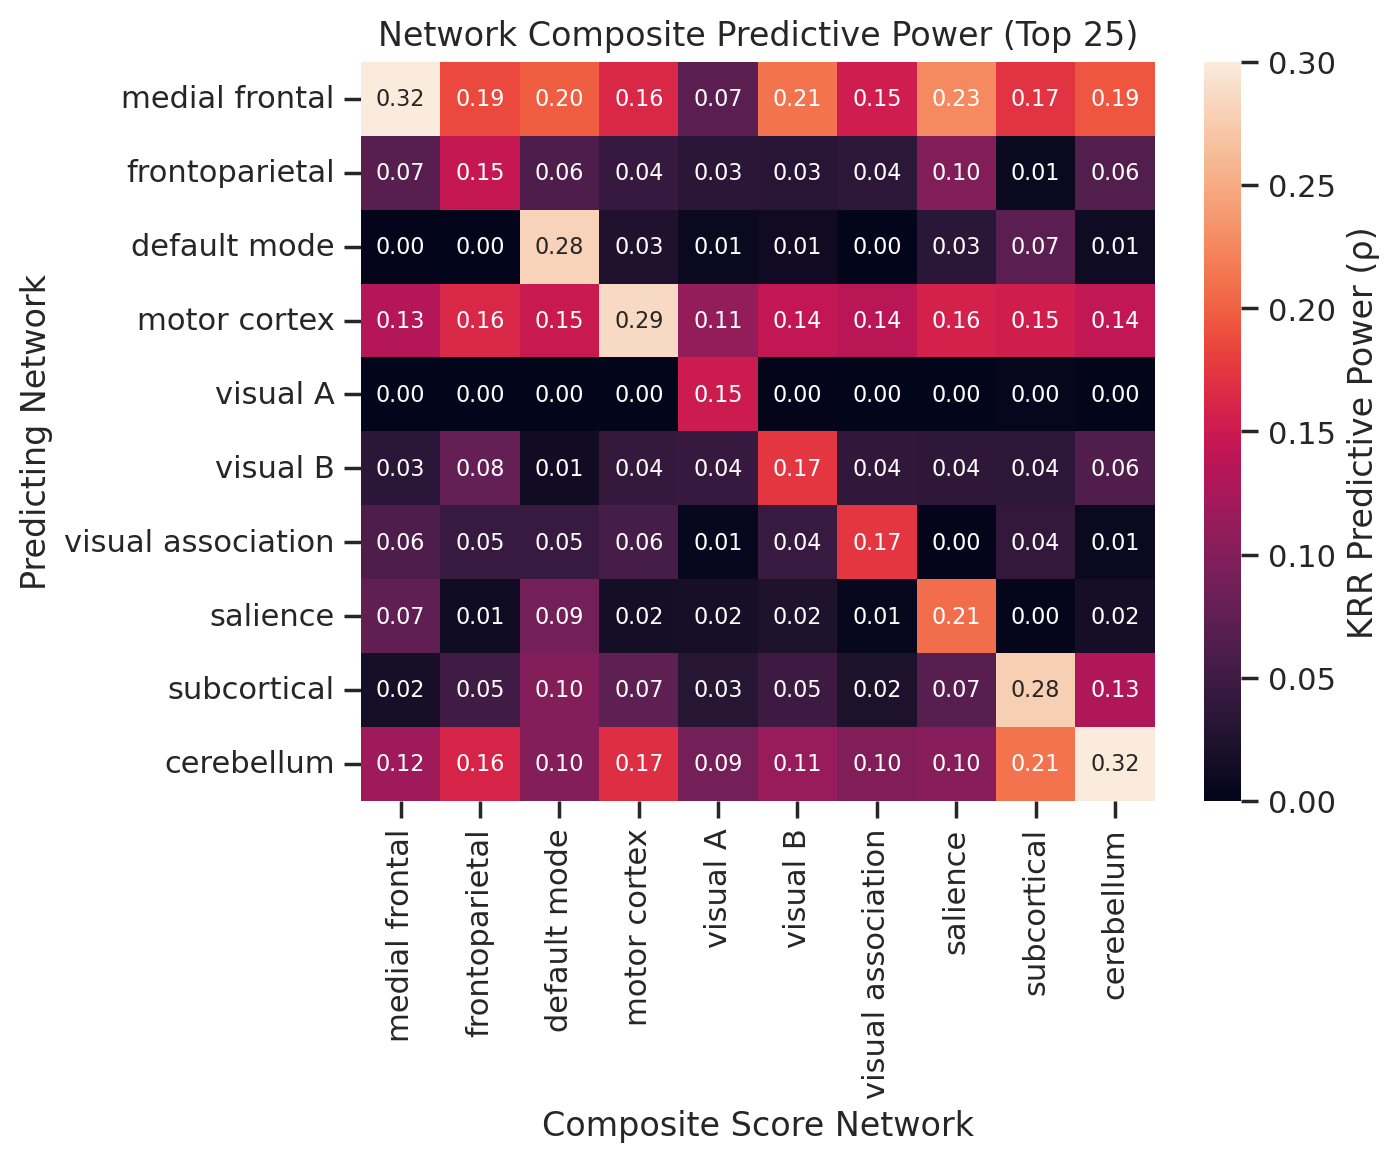

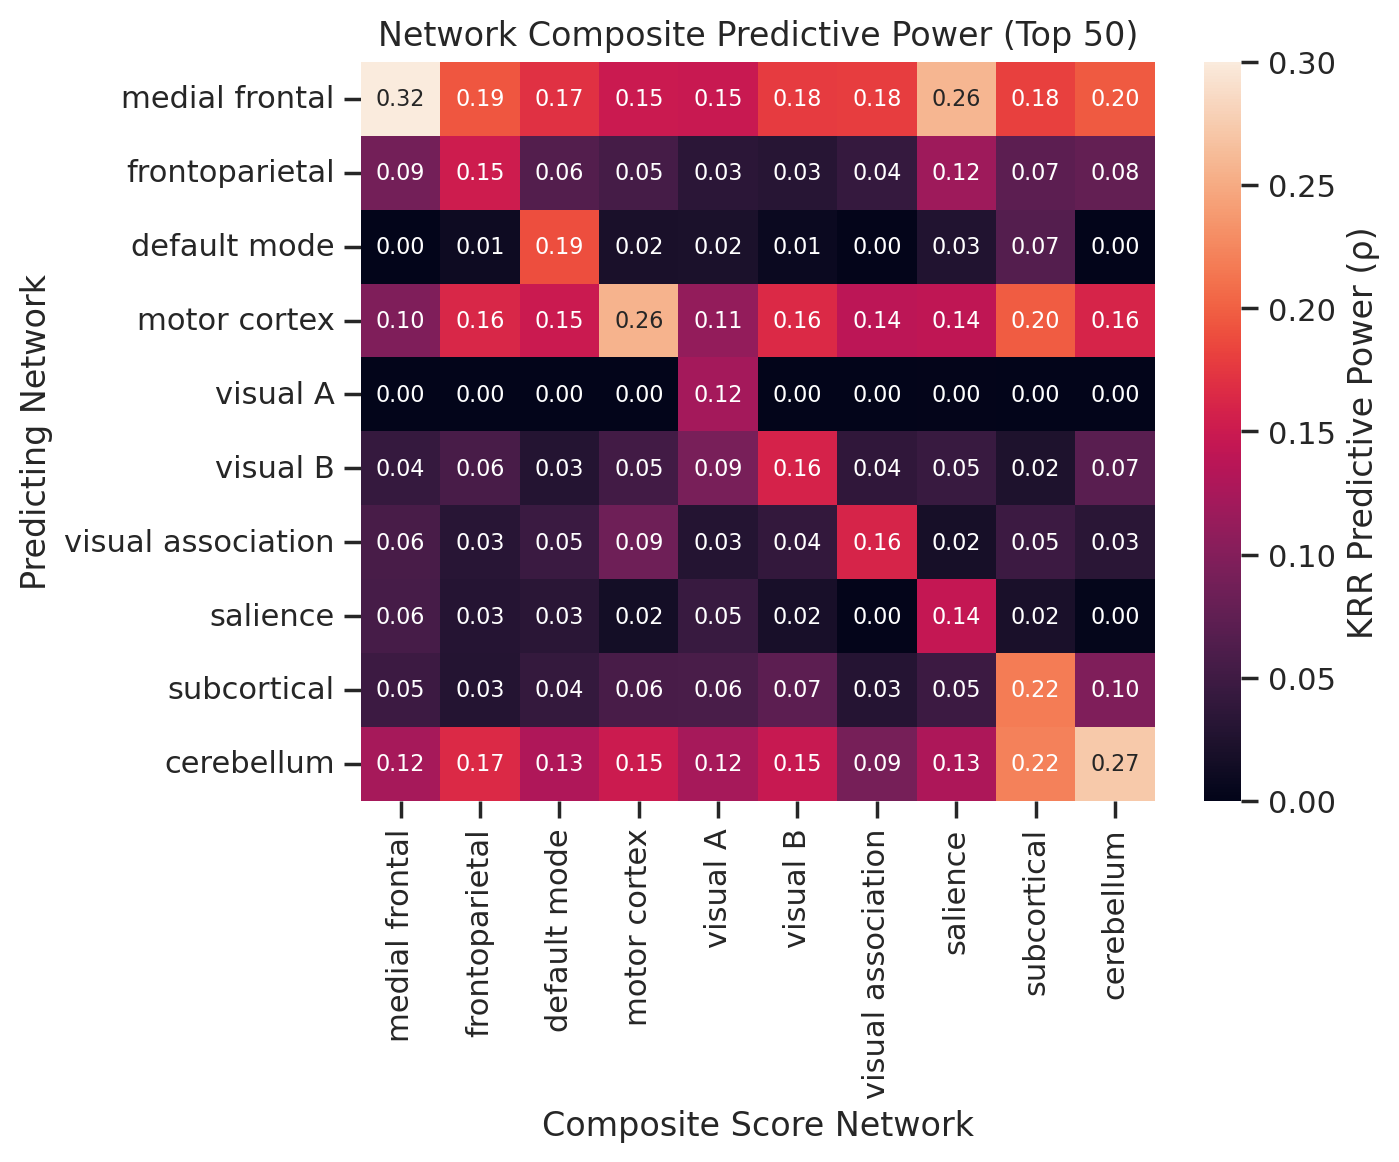


***Supplementary Figure 8*** *— Pairwise comparison of kernel ridge regression (KRR) predictive power across functional networks. Networks predict composite scores of top-ranking items (top 3, 5, 25, and 50 items ranked by predictive power).*

***
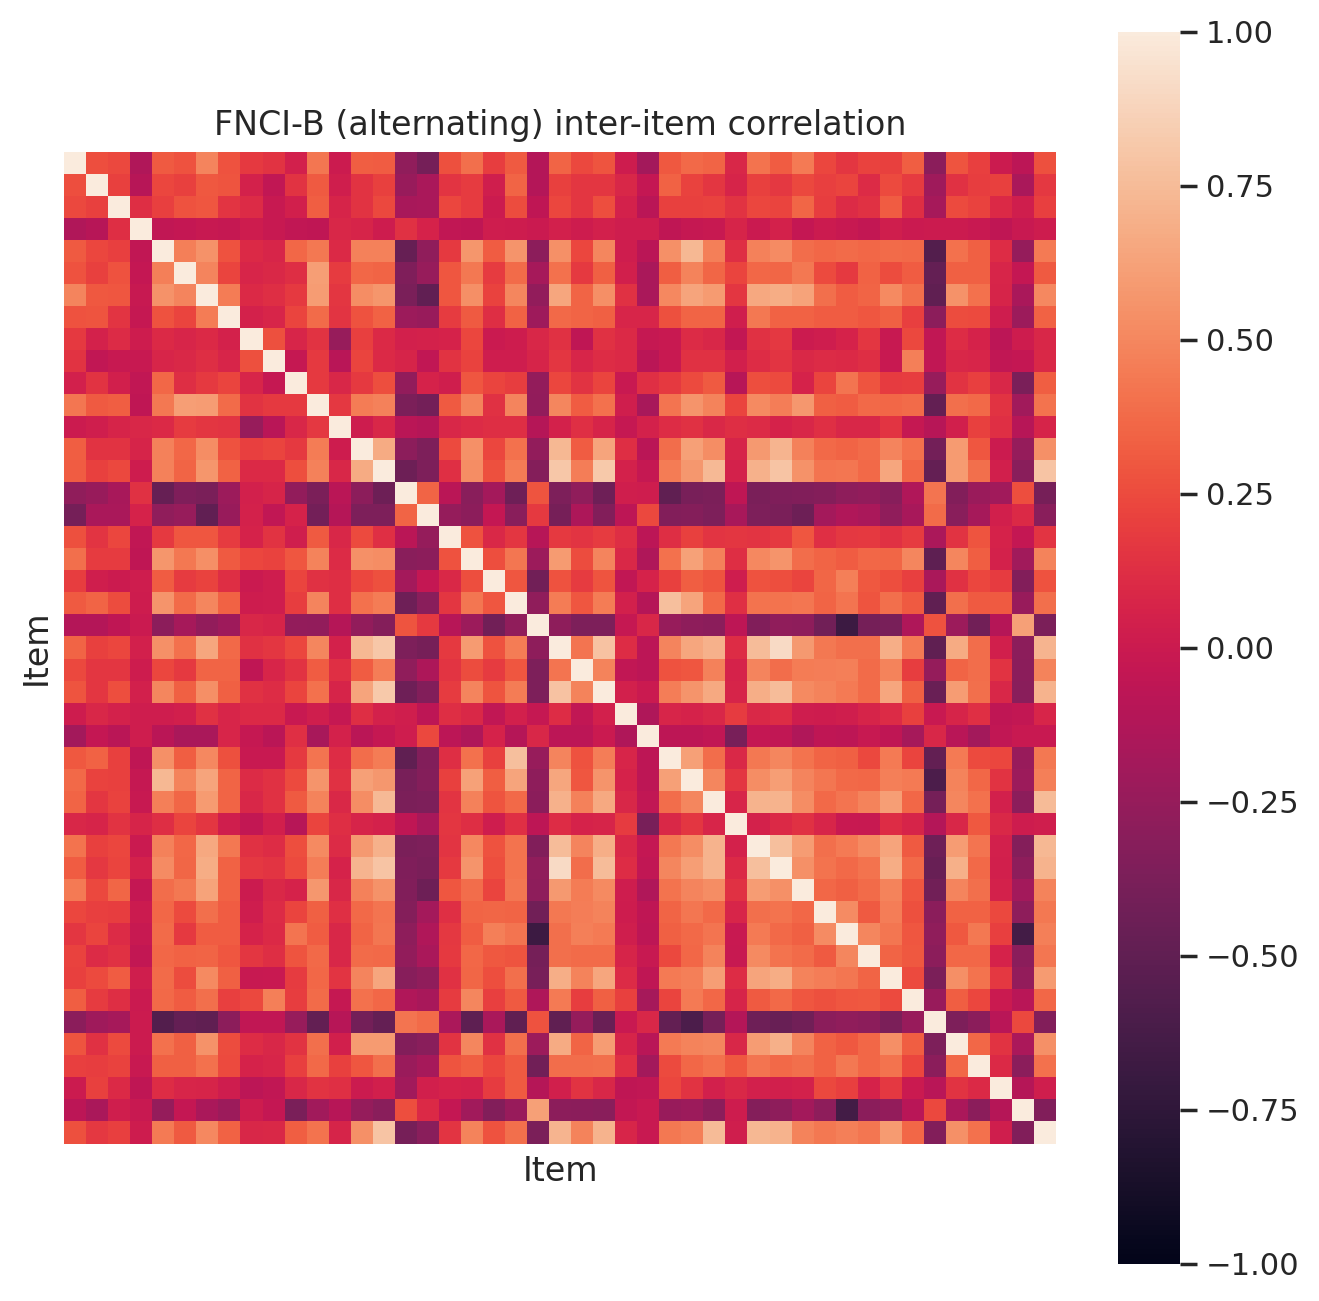
*Supplementary Figure 9 – Functional Network Connectivity Index inter-item correlation structure across groups**

Pearson Correlation


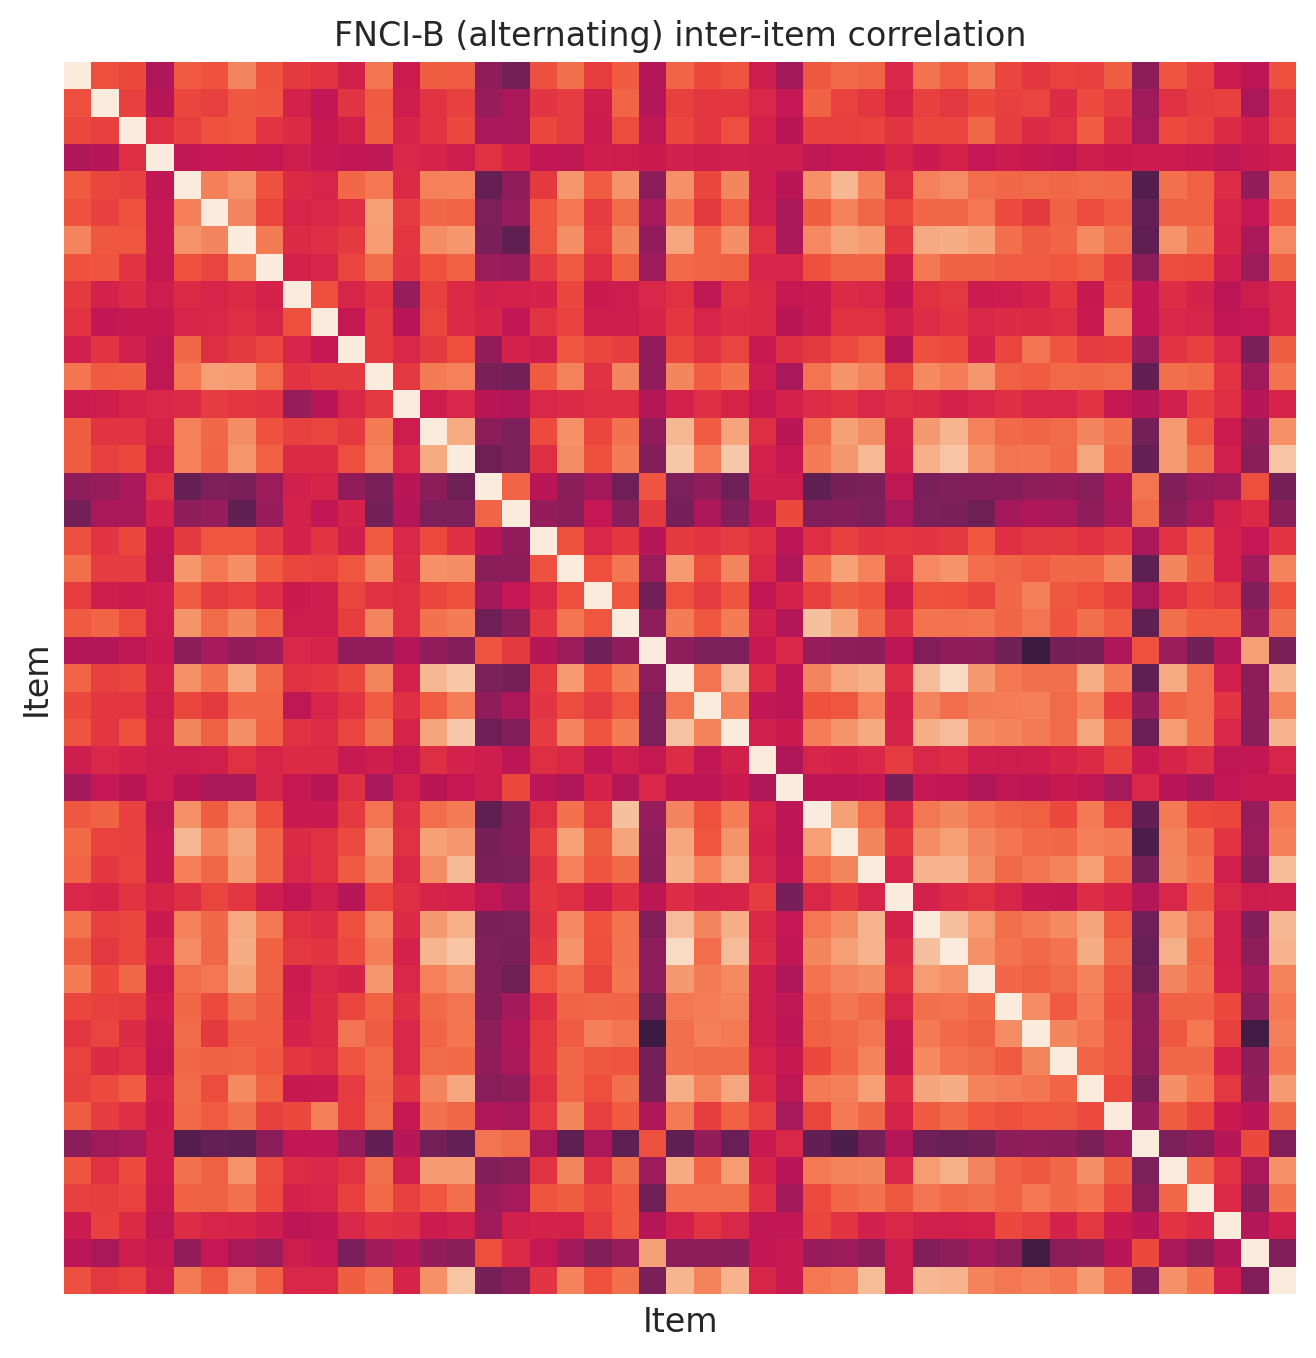

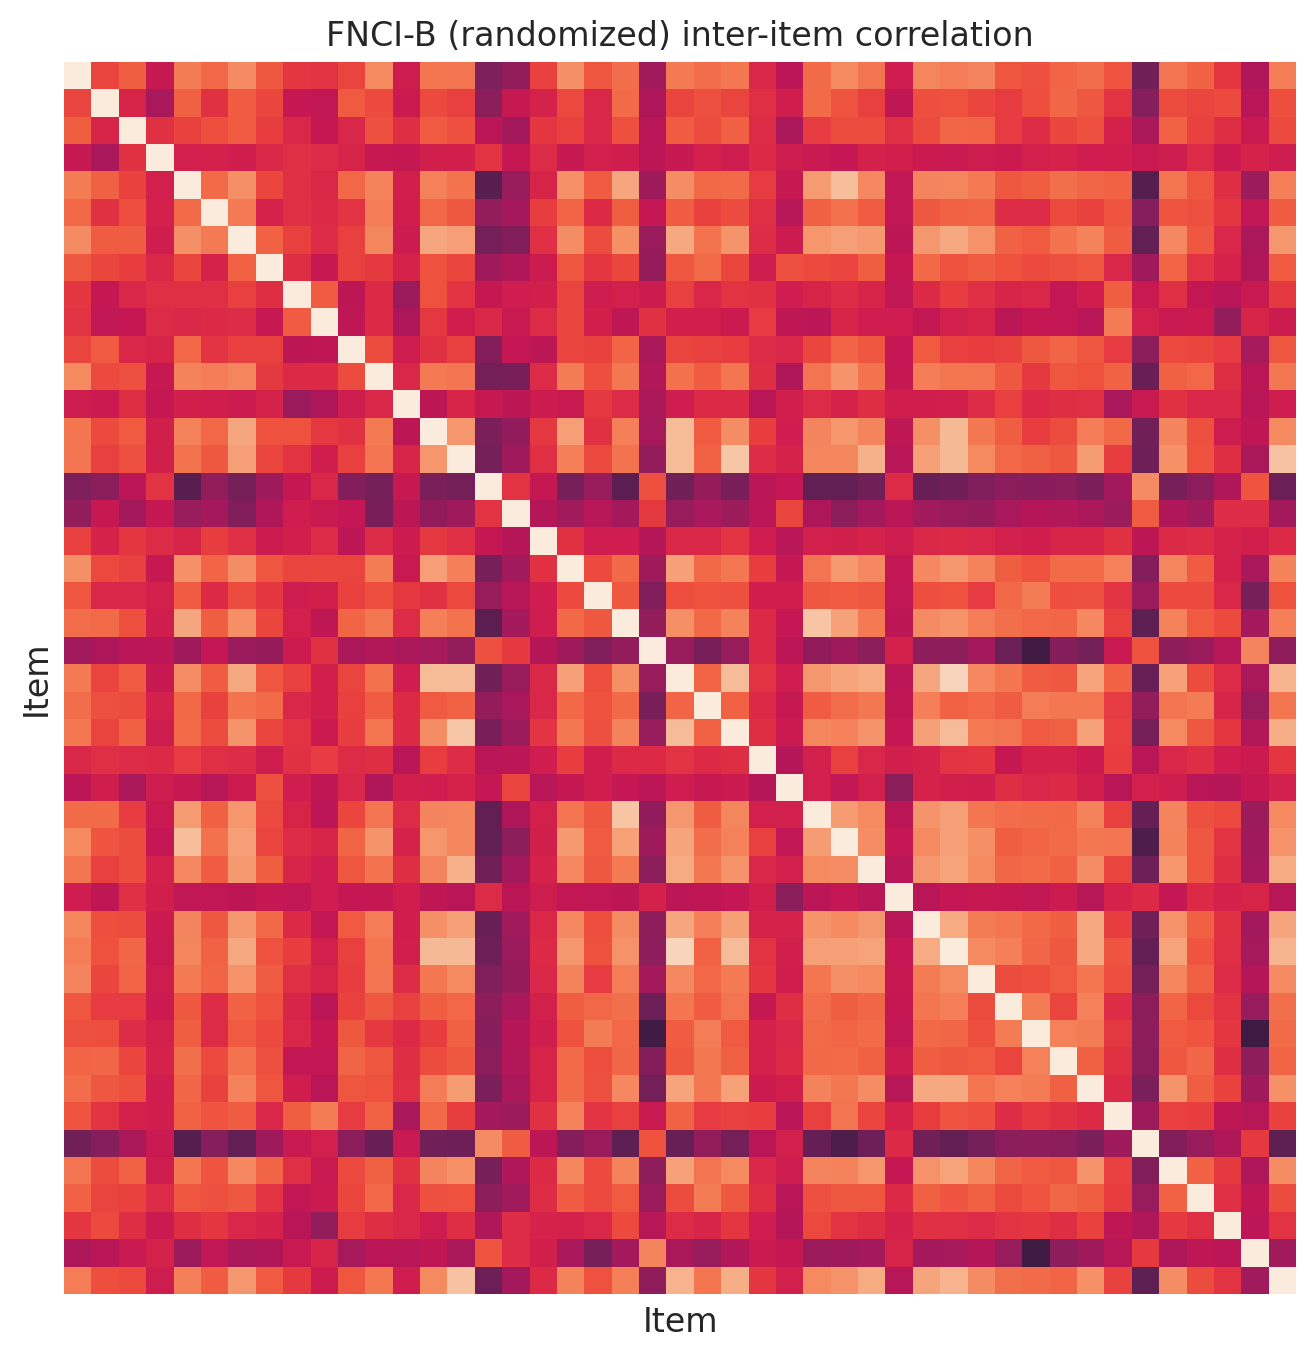

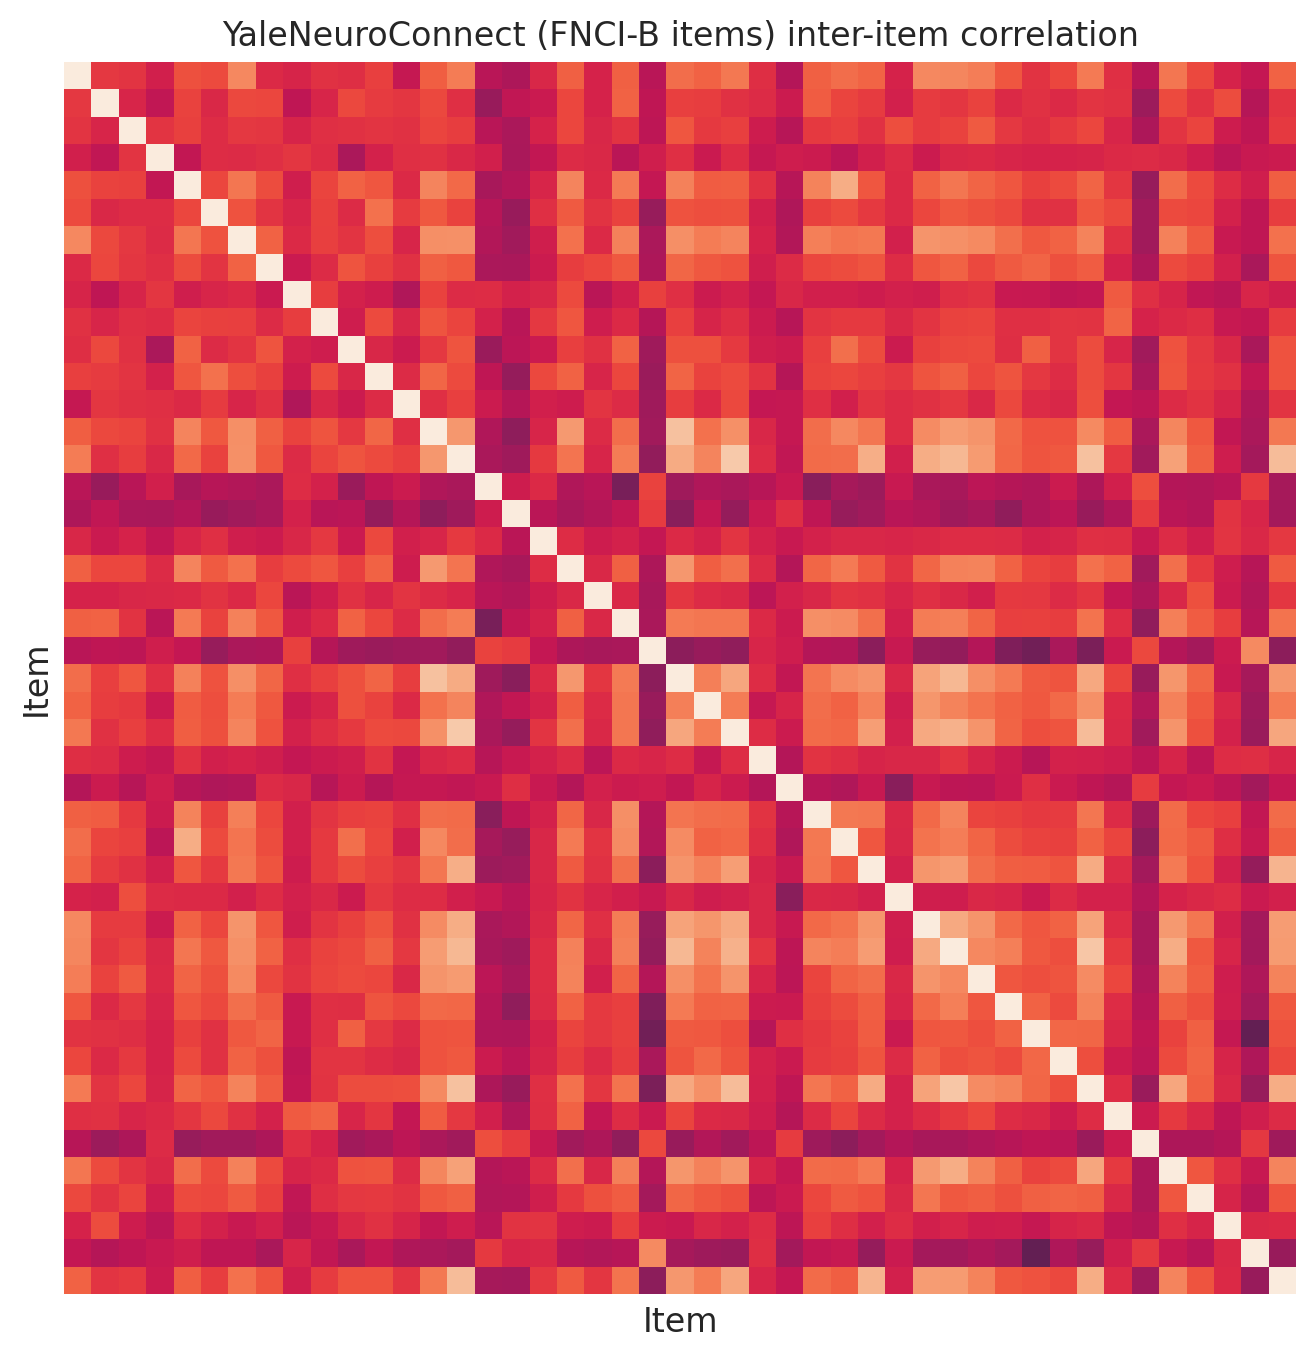

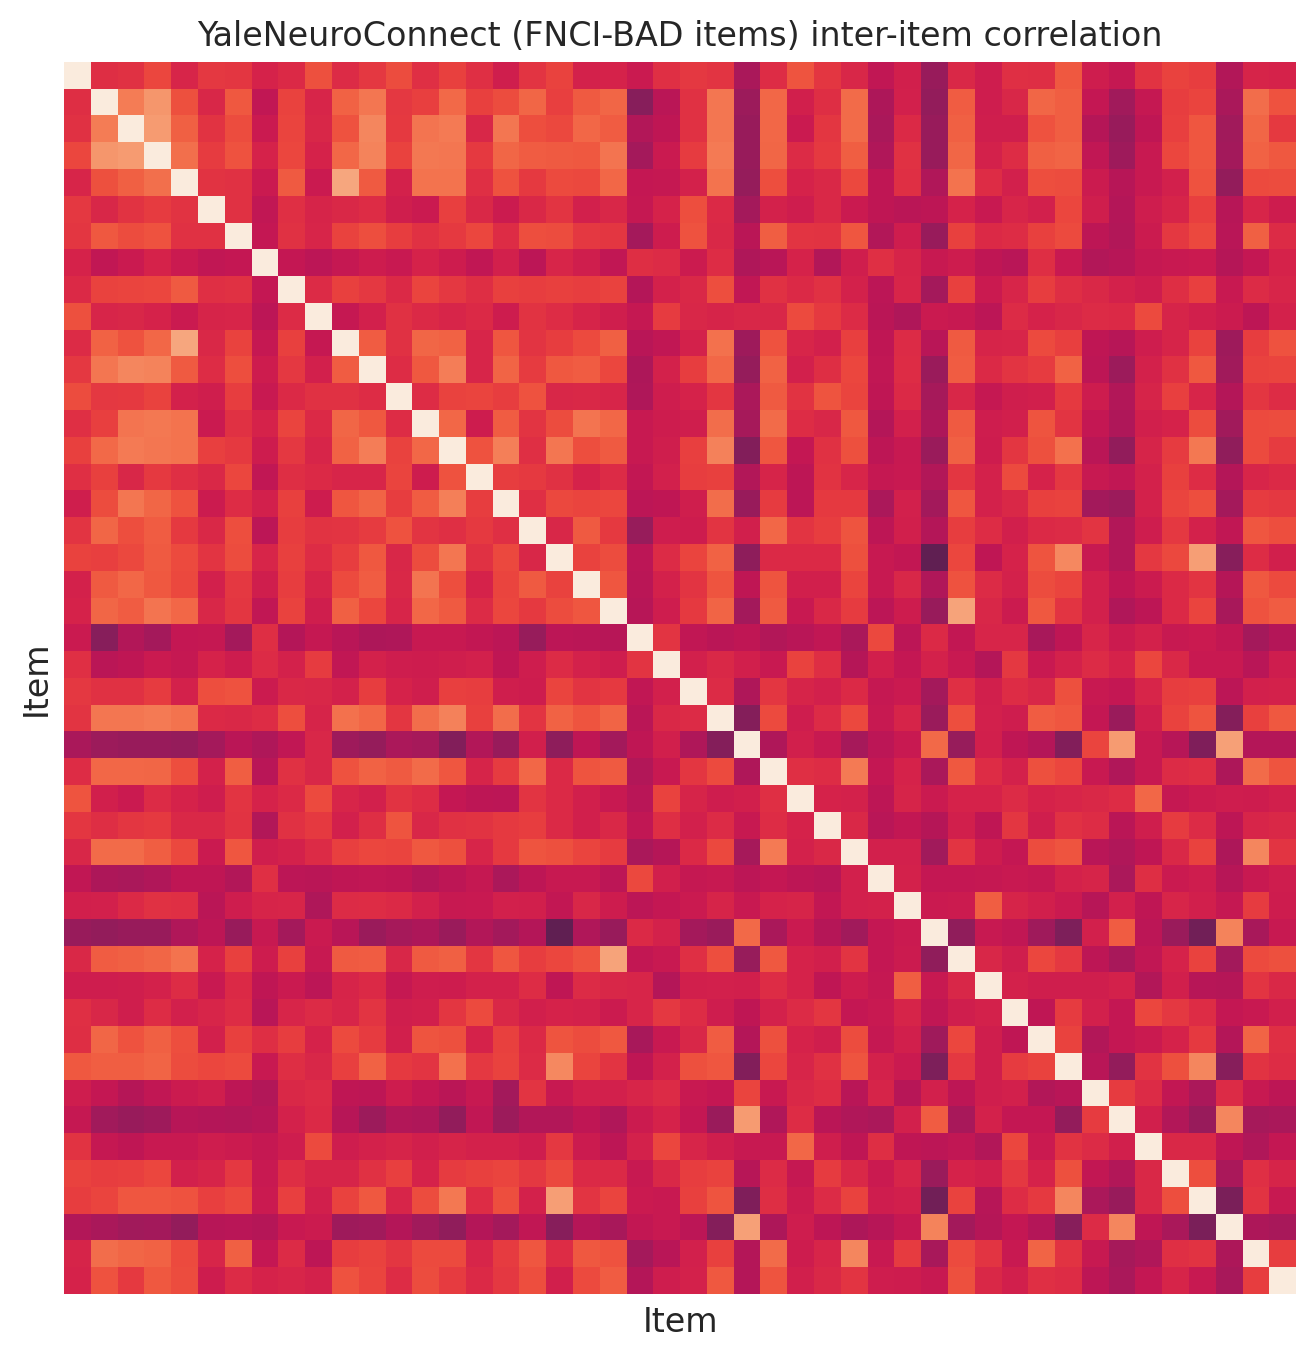

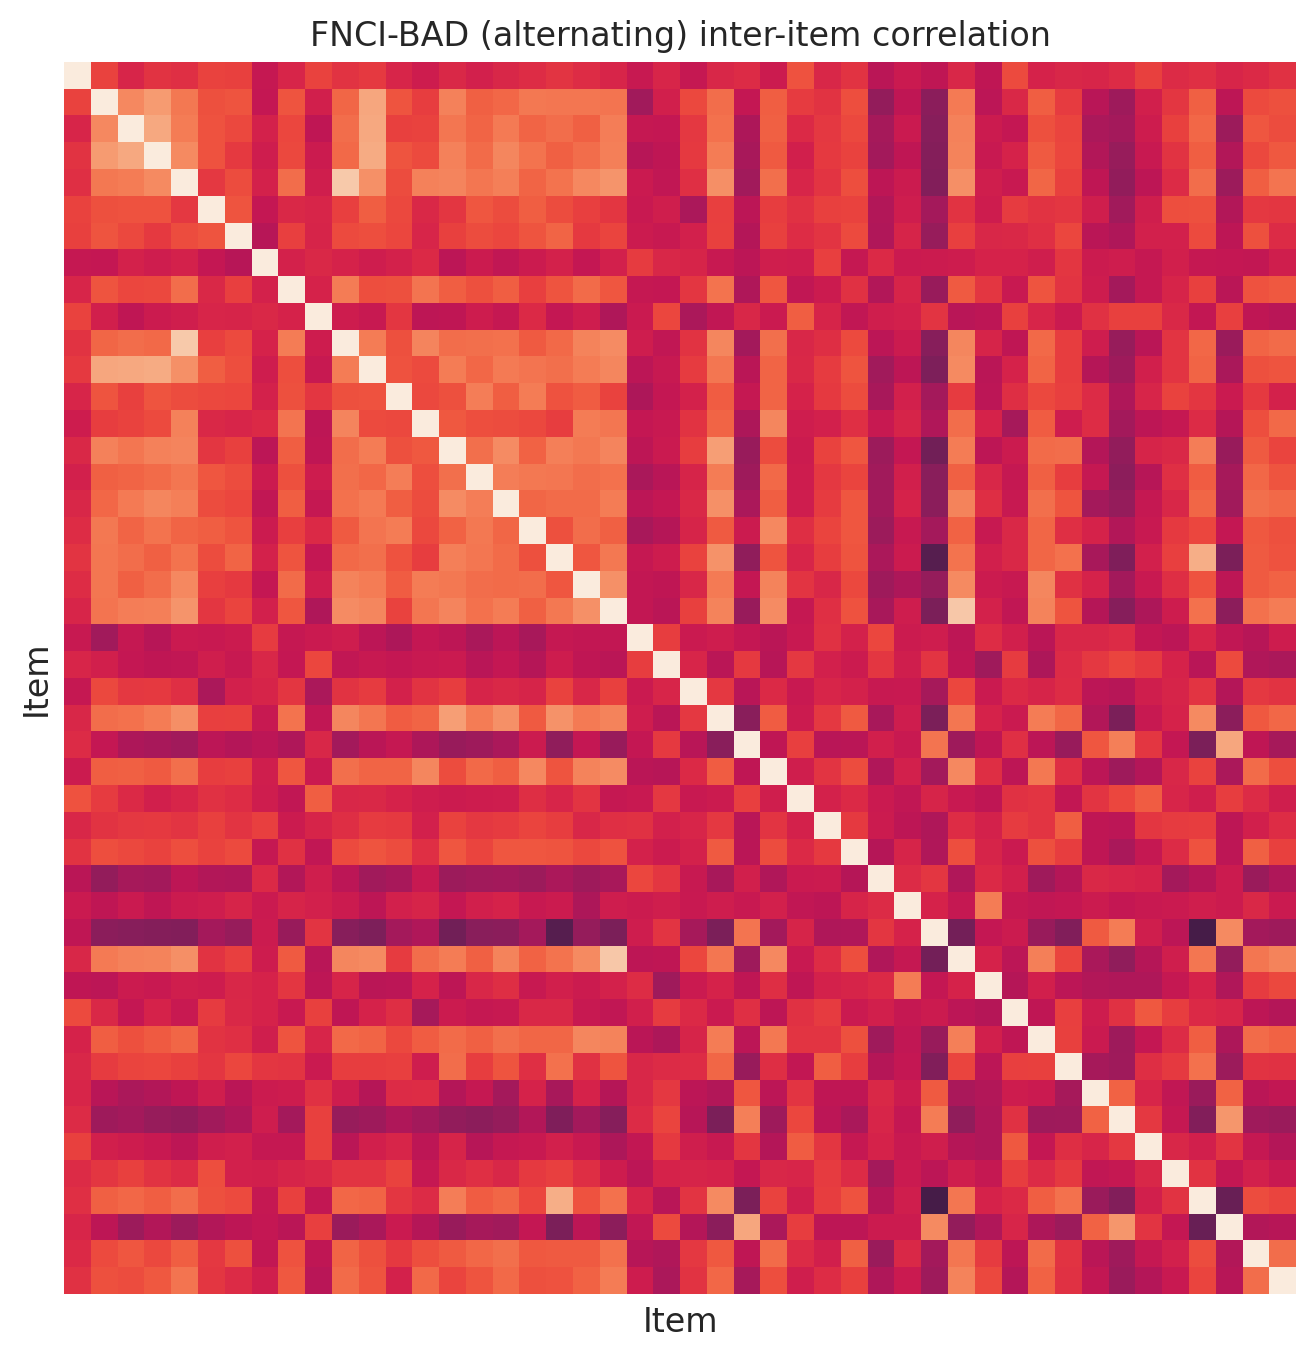


**a)**

**b)**

**c)**

**d)**

**e)**

***Supplementary Figure 9 —*** *Correlation structure of item responses within the Functional Network Connectivity Index – Brief (FNCI-B) and control test (FNCI-BAD) across administration groups****. a)*** *FNCI-B inter-item correlations in the YaleNeuroConnect (YNC) dataset.* ***b)*** *FNCI-B inter-item correlations for online administration with alternating item order.* ***c)*** *FNCI-B inter-item correlations for online administration with randomized item order.* ***d)*** *FNCI-BAD inter-item correlations in the YNC dataset.* ***e)*** *FNCI-BAD inter-item correlations for online administration with alternating item order.*

**Supplementary Figure 10 – Functional Network Connectivity Index inter-item correlation is highly correlated across groups**


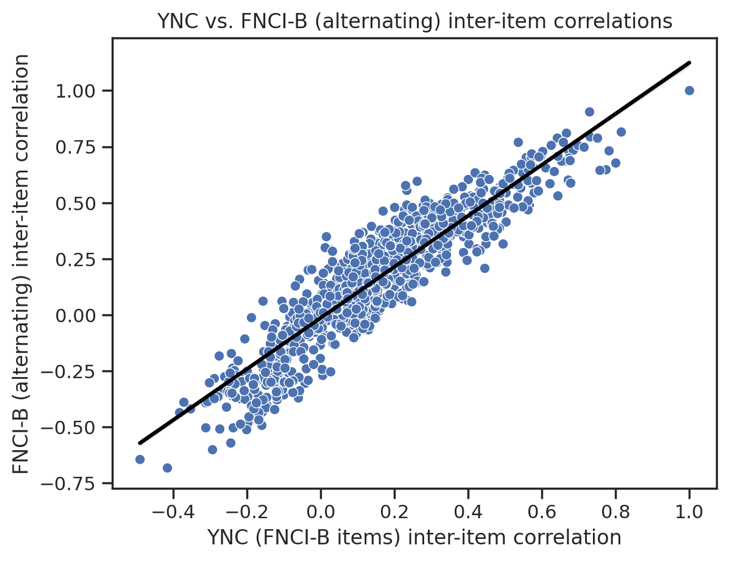


*r2 = 0.87*


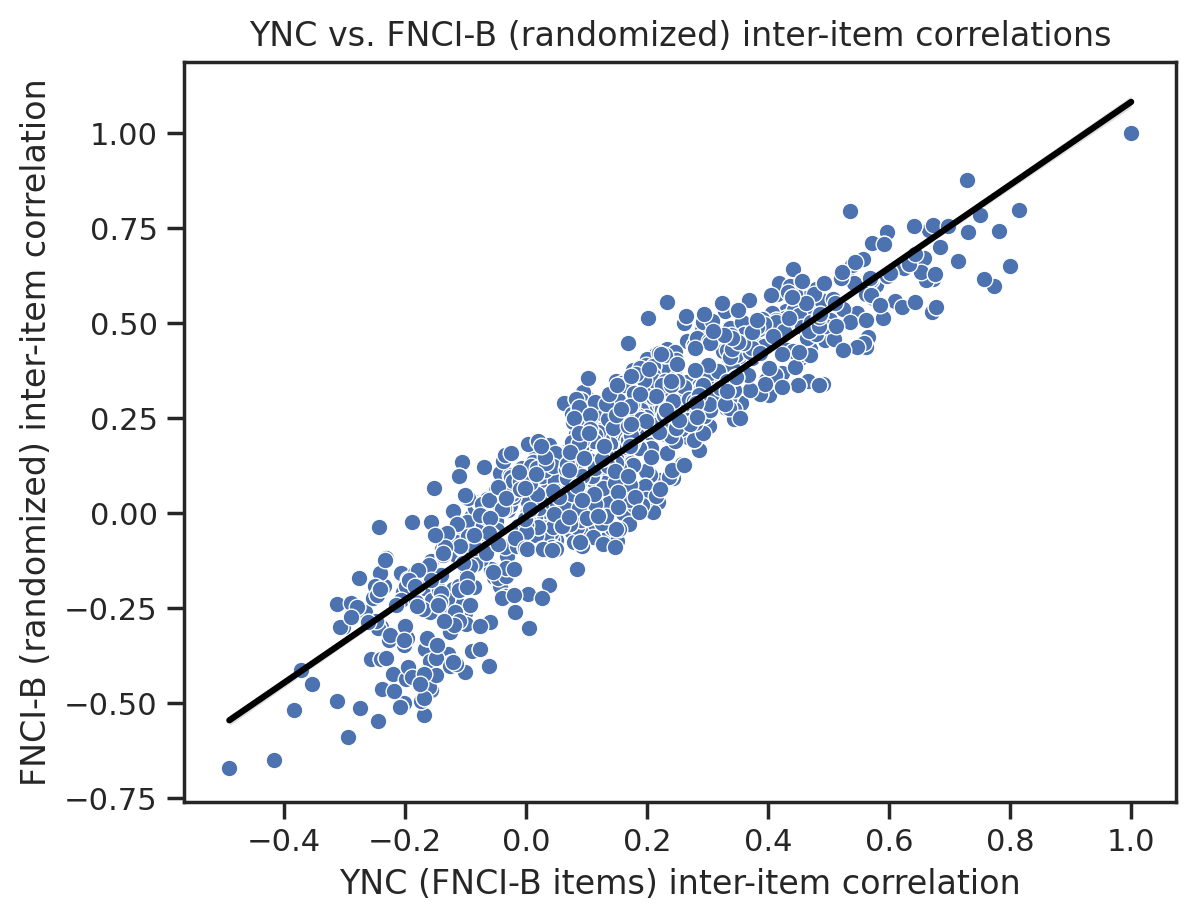


*r2 = 0.86*


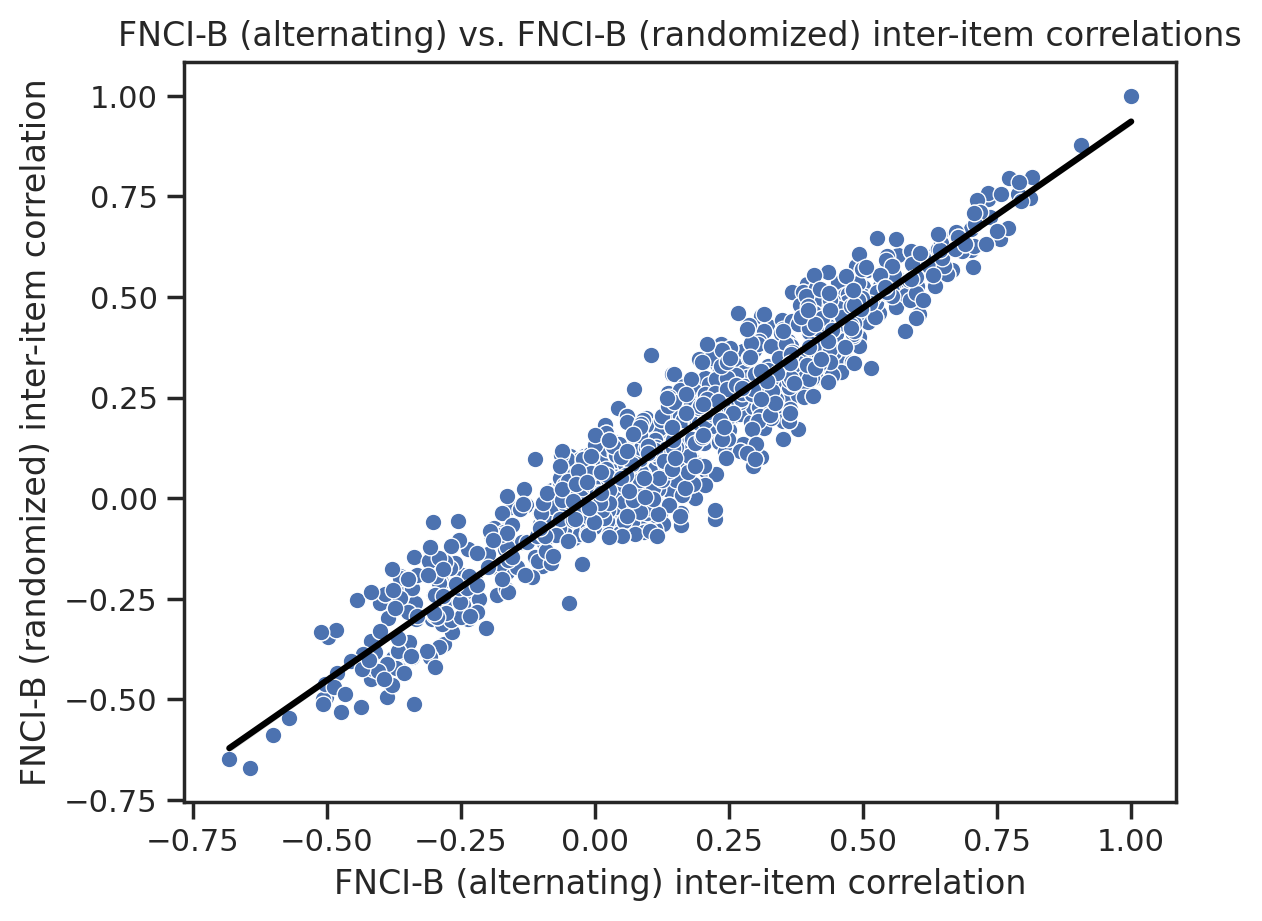


*r2 = 0.93*


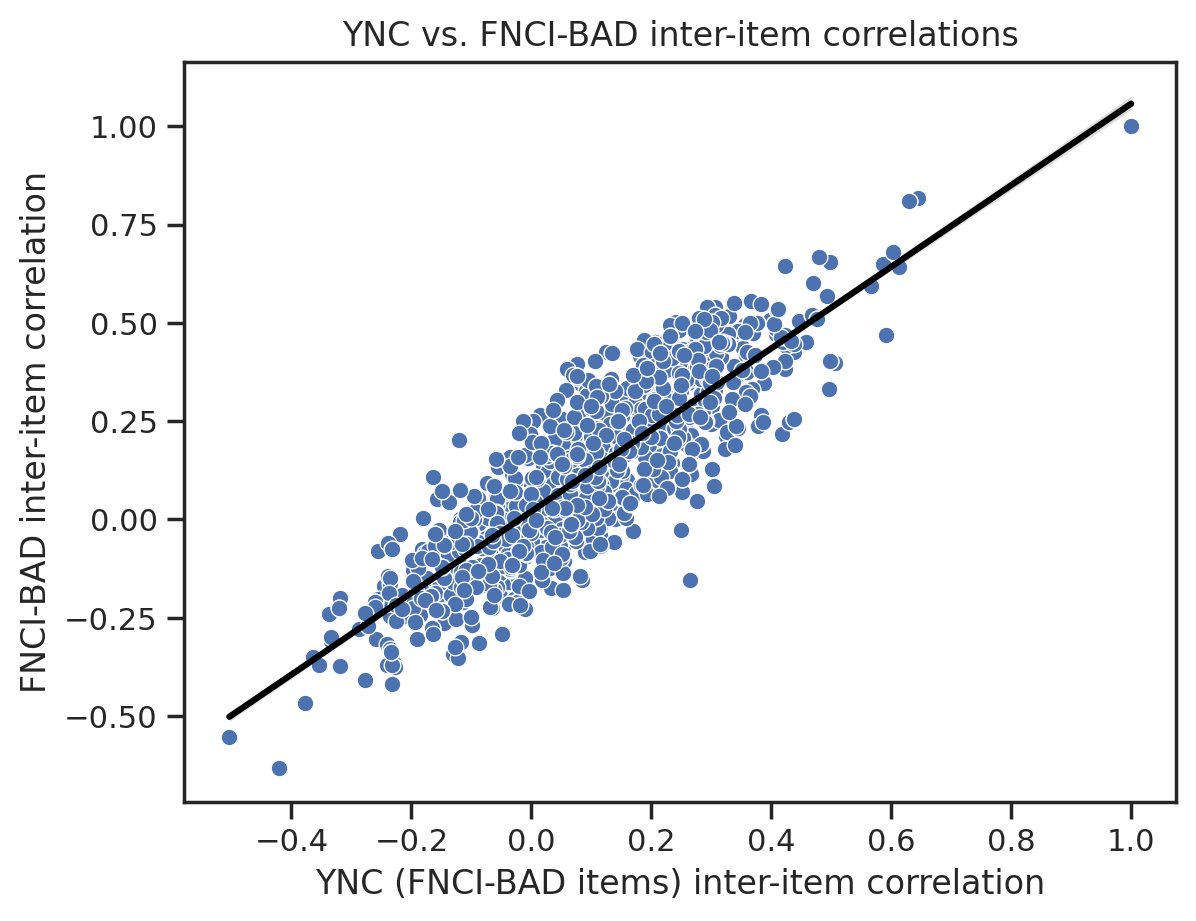


*r2 = 0.81*

**a)**

**b)**

**c)**

**d)**

***Supplementary Figure 10 —*** *Comparison of item response correlation structures across administration groups.* ***a)*** *Inter-item correlation of FNCI-B items in the YaleNeuroConnect (YNC) dataset versus in the online group (alternating item order).* ***b)*** *Inter-item correlation of FNCI-B items in the YNC dataset versus in the online group (randomized item order).* ***c)*** *Inter-item correlation of FNCI-B items in the online group with alternating order versus randomized order.* ***d)*** *Inter-item correlations of FNCI-BAD items in the YNC dataset vs online group (alternating item order). Correlation strength reported as the coefficient of determination (r2).*

**Supplementary Figure 11 – Functional Network Connectivity Index factor structure does not meaningfully differ across groups**


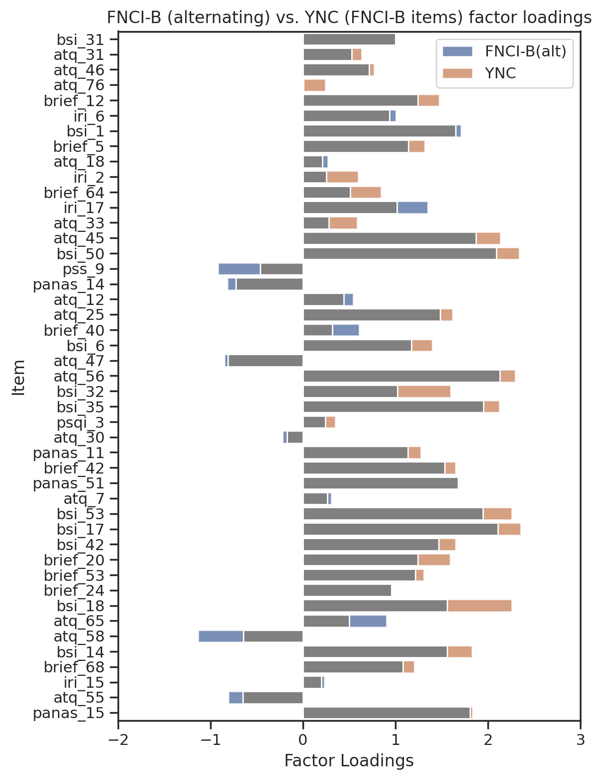

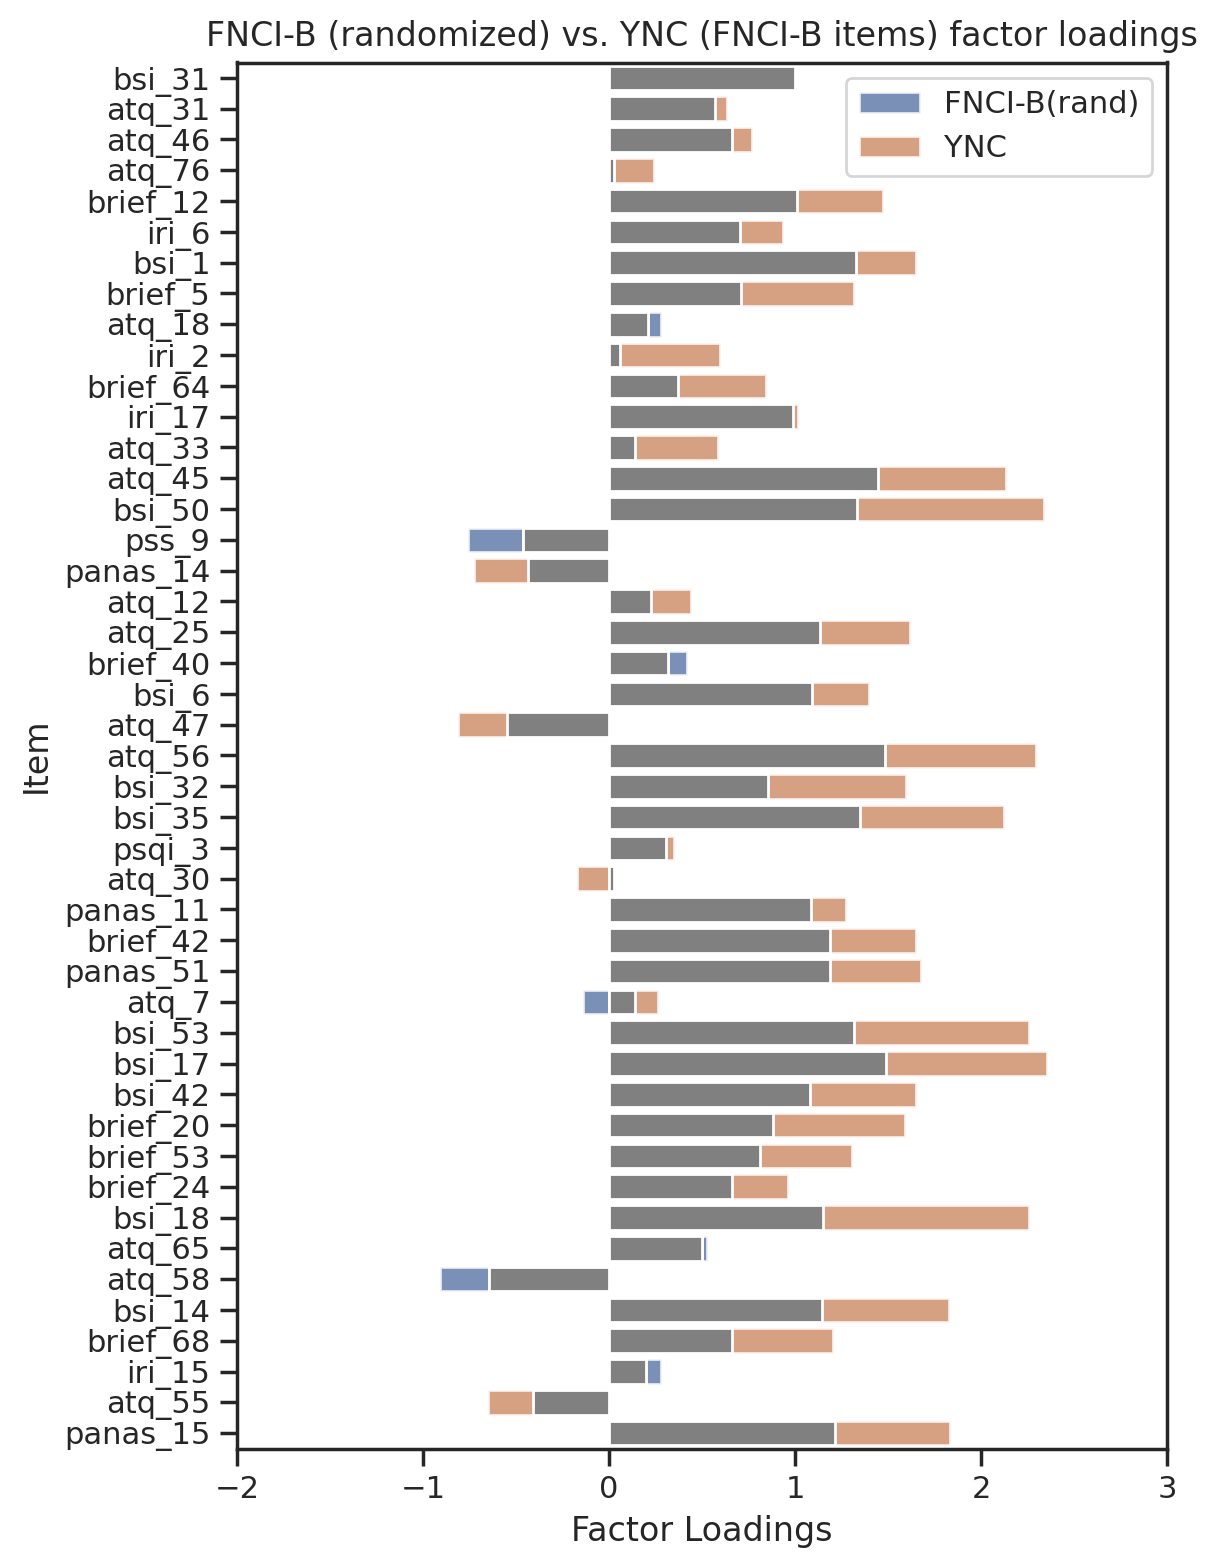


**a)**

**b)**

ΔGFI =

-0.03

ΔGFI = -0.04


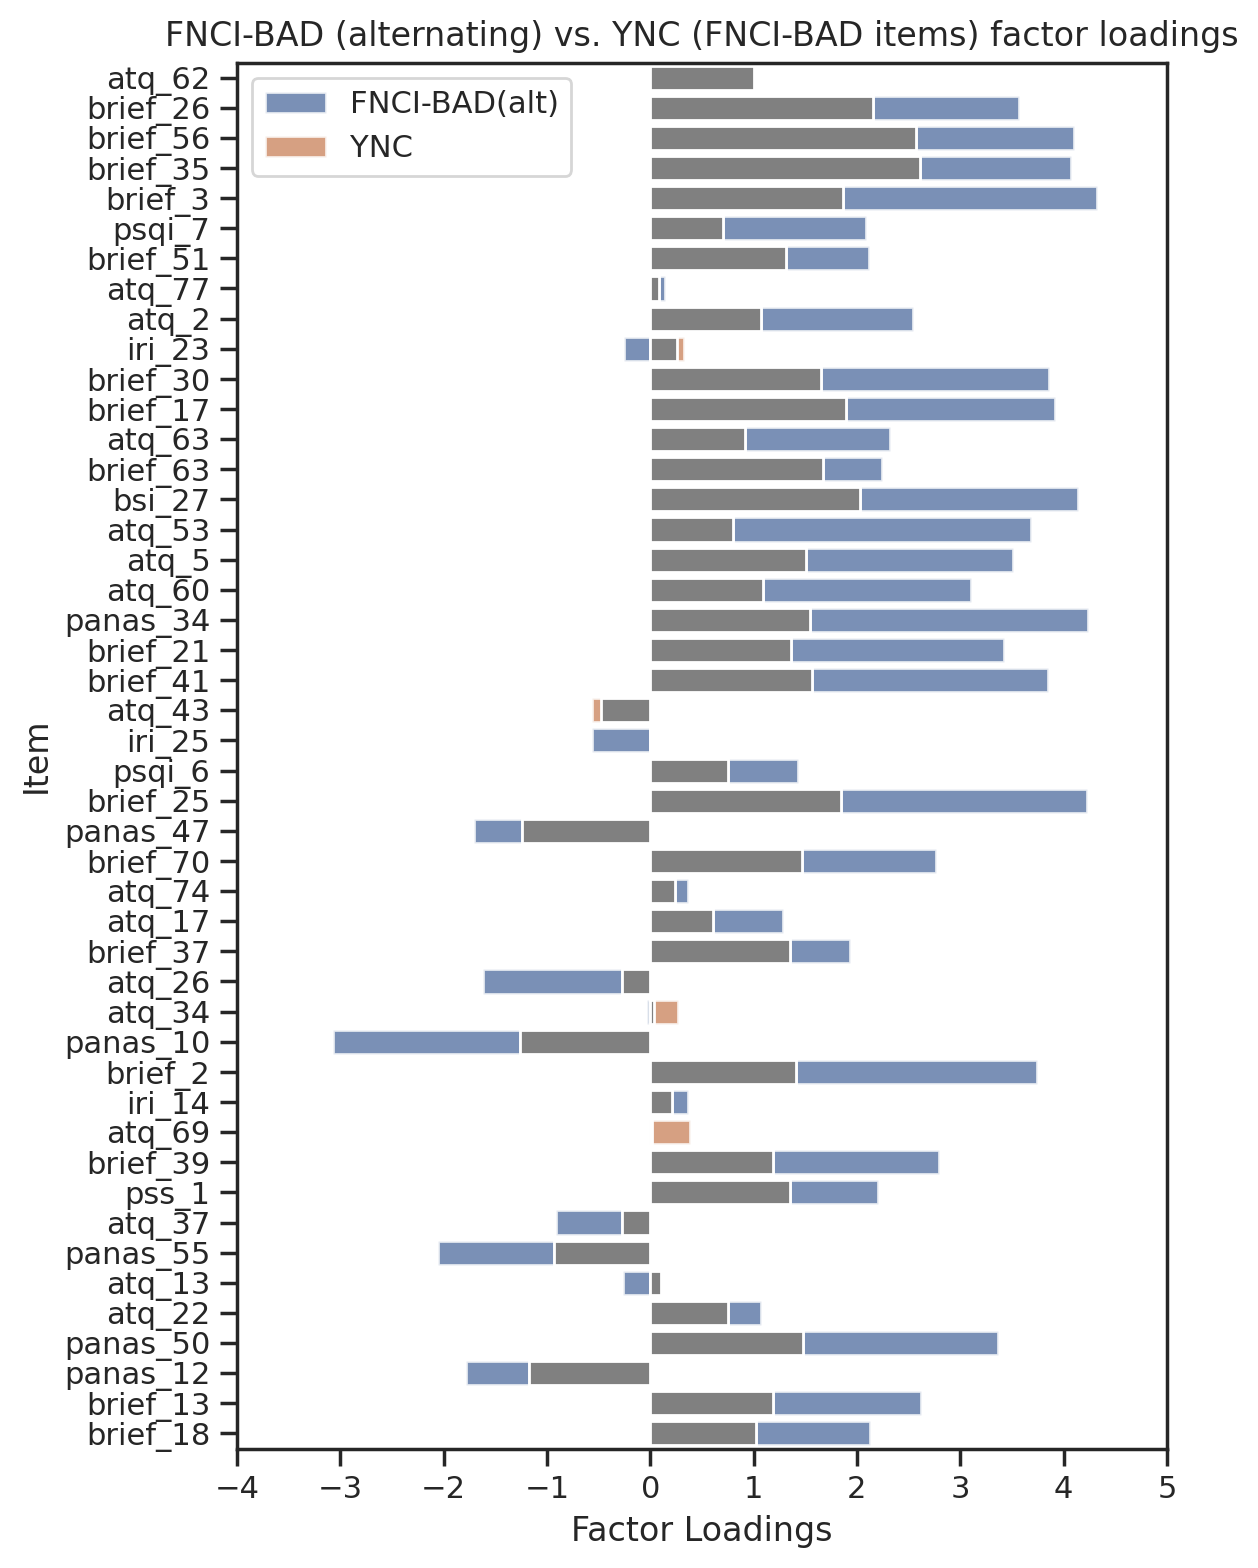


**c)**

ΔGFI = -0.04

***Supplementary Figure 11 —*** *Comparison of the single-factor structure of items across administration groups.* ***a)*** *Factor loadings for each item within the FNCI-B for YaleNeuroConnect (YNC) data (orange) and online administration with alternating item order (blue).* ***b)*** *Factor loadings for each item within the FNCI-B for YNC data (orange) and online administration with randomized item order (blue).* ***c)*** *Factor loadings for each item within the FNCI-BAD for YNC data (orange) and online administration with alternating order (blue).Change in goodness-of-fit from YNC to online administration is reported (ΔGFI) for each comparison.*
