# Supplementary material
Source: Research Square preprint supplement (doi:10.21203/rs.3.rs-9696300/v1)
Supplement: Supplementary file 1 [file 10fe3094f147c2624fc34ded.xlsx]

## Sheet: Supplementary Table 1
Instrument	# Subscales	# Items	Response Range	Notes
Adult Temperament Questionnaire (ATQ)	13	77	7
Interpersonal Reactivity Index (IRI)	4	28	5
Percieved Stress Scale (PSS)	1	14	5
Pittsburgh Sleep Quality Index (PSQI)	1	14	4	Only Likert-scale items were recorded
Behavior Rating Inventory of Executive Function, Adult (BRIEF-A)	12	75	3	Categories "Infrequency", "Inconsistency", and "Negativity" are used to assess reliability of responses
Brief Symptom Inventory (BSI)	10	53	5	Items with distressing content were censored and not collected (#9, #39, #40)
Positive And Negative Affect Schedule, Extended (PANAS-X)	13	60	5
Total	54	321

## Sheet: Supplementary Table 2
item_index	instrument	item_num	item_text	item_summary	reverse_score	in_composite	disincluded	response_range	primary_category	secondary_category			Feature	Description
atq_1	ATQ	1	I become easily frightened	easily frightened	0	1	0	7	Fear				index	Item ID
atq_2	ATQ	2	I am often late for appointments	late for appointments	1	1	0	7	Activation				instrument	Instrument code
atq_3	ATQ	3	Sometimes minor events cause me to feel intense happiness	minor events cause intense happiness	0	1	0	7	Positive Affect				item_num	Item number
atq_4	ATQ	4	I find loud noises to be very irritating	loud noises are irritating	0	1	0	7	Discomfort				item_text	Raw item text
atq_5	ATQ	5	It's often hard for me to alternate between two different tasks	hard to alternate between tasks	1	1	0	7	Attention				item_summary	Summary of item text
atq_6	ATQ	6	I rarely become annoyed when I have to wait in a slow moving line	not annoyed by slow moving lines	1	1	0	7	Frustration				reverse_score	Item scoring direction
atq_7	ATQ	7	I would not enjoy the sensation of listening to loud music with a laser light show	enjoy the sensation of loud music with laser show	1	1	0	7	Pleasure				in_composite	Item inclusion in composite score
atq_8	ATQ	8	I often make plans that I do not follow through with	make plans that I do not follow through	1	1	0	7	Activation				disincluded	Disincluded from data collection
atq_9	ATQ	9	I rarely feel sad after saying goodbye to friends or relatives	not feel sad after saying goodbye to friends/relatives	1	1	0	7	Sadness				response_range	Likert-scale range
atq_10	ATQ	10	Barely noticeable visual details rarely catch my attention	barely noticeable visual details catch my attention	1	1	0	7	Neutral Sensitivity				primary_category	Primary subscale category
atq_11	ATQ	11	Even when I feel energized, I can usually sit still without much trouble if it's necessary	sitting still when energized	0	1	0	7	Inhibition				secondary_category	Secondary subscale category
atq_12	ATQ	12	Looking down at the ground from an extremely high place would make me feel uneasy	uneasy from looking down from a high place	0	1	0	7	Fear
atq_13	ATQ	13	When I am listening to music, I am usually aware of subtle emotional tones	aware of the subtle emotional tones of music	0	1	0	7	Affective Sensitivity
atq_14	ATQ	14	I would not enjoy a job that involves socializing with the public	not enjoying a job that involves socializing with the public	1	1	0	7	Sociability
atq_15	ATQ	15	I can keep performing a task even when I would rather not do it	performing a task when would rather not	0	1	0	7	Activation
atq_16	ATQ	16	I sometimes seem to be unable to feel pleasure from events and activities that I should enjoy	unable to feel pleasure from enjoyable events/activities	1	1	0	7	Positive Affect
atq_17	ATQ	17	I find it very annoying when a store does not stock an item that I wish to buy	annoyed by stores not stocking desired items	0	1	0	7	Frustration
atq_18	ATQ	18	I tend to notice emotional aspects of paintings and pictures	noticing emotional aspects of paintings and pictures	0	1	0	7	Affective Sensitivity
atq_19	ATQ	19	I usually like to talk a lot	like to talk a lot	0	1	0	7	Sociability
atq_20	ATQ	20	I seldom become sad when I watch a sad movie	not sad when watching sad movie	1	1	0	7	Sadness
atq_21	ATQ	21	I'm often aware of the sounds of birds in my vicinity	aware of the sounds of birds	0	1	0	7	Neutral Sensitivity
atq_22	ATQ	22	When I am enclosed in small places such as an elevator, I feel uneasy	uneasy when enclosed in a small space	0	1	0	7	Fear
atq_23	ATQ	23	When listening to music, I usually like to turn up the volume more than other people	turn up music volume more than others	0	1	0	7	Pleasure
atq_24	ATQ	24	I sometimes seem to understand things intuitively	understand things intuitively	0	1	0	7	Associative Sensitivity
atq_25	ATQ	25	Sometimes minor events cause me to feel intense sadness	minor events cause intense sadness	0	1	0	7	Sadness
atq_26	ATQ	26	It is easy for me to hold back my laughter in a situation when laughter wouldn't be appropriate	hold back inappropriate laughter	0	1	0	7	Inhibition
atq_27	ATQ	27	I can make myself work on a difficult task even when I don't feel like trying	work on a difficult task when don't feel like trying	0	1	0	7	Activation
atq_28	ATQ	28	I rarely ever have days where I don't at least experience brief moments of intense happiness	days with brief moments of intense happiness	0	1	0	7	Positive Affect
atq_29	ATQ	29	When I am trying to focus my attention, I am easily distracted	easily distracted when trying to focus attention	1	1	0	7	Attention
atq_30	ATQ	30	I would probably enjoy playing a challenging and fast paced video-game that makes lots of noise and has lots of flashing, bright lights	enjoy a challenging, fast, noisy, video game with bright flashing lights	0	1	0	7	Pleasure
atq_31	ATQ	31	Whenever I have to sit and wait for something (e.g., a waiting room), I become agitated	agitated when sitting and waiting	0	1	0	7	Frustration
atq_32	ATQ	32	I'm often bothered by light that is too bright	bothered by bright light	0	1	0	7	Discomfort
atq_33	ATQ	33	I rarely notice the color of people's eyes	not noticing the color of people's eyes	1	1	0	7	Neutral Sensitivity
atq_34	ATQ	34	I seldom become sad when I hear of an unhappy event	sad when hearing of an unhappy event	1	1	0	7	Sadness
atq_35	ATQ	35	When interrupted or distracted, I usually shift my attention back to whatever I was doing before	shift attention back after interruption/distraction	0	1	0	7	Attention
atq_36	ATQ	36	I find certain scratchy sounds very irritating	irritated by scratchy sounds	0	1	0	7	Discomfort
atq_37	ATQ	37	I like conversations that include several people	like conversations with several people	0	1	0	7	Sociability
atq_38	ATQ	38	I am usually a patient person	patient	1	1	0	7	Frustration
atq_39	ATQ	39	When I am resting with my eyes closed, I sometimes see visual images	see visual images when resting with eyes closed	0	1	0	7	Associative Sensitivity
atq_40	ATQ	40	It is very hard for me to focus my attention when I am distressed	hard to focus attention when distressed	1	1	0	7	Attention
atq_41	ATQ	41	Sometimes my mind is full of a diverse array of loosely connected thoughts and images	mind full of diverse, loosely connected thoughts/ images	0	1	0	7	Associative Sensitivity
atq_42	ATQ	42	Very bright colors sometimes bother me	bothered by very bright colors	0	1	0	7	Discomfort
atq_43	ATQ	43	I can easily resist talking out of turn, even when I'm excited and want to express an idea	resist talking out of turn when excited by idea expression	0	1	0	7	Inhibition
atq_44	ATQ	44	I would probably not enjoy a fast, wild carnival ride	not enjoy fast, wild carnival ride	1	1	0	7	Pleasure
atq_45	ATQ	45	I sometimes feel sad for longer than an hour	feel sad for longer than an hour	0	1	0	7	Sadness
atq_46	ATQ	46	I rarely enjoy socializing with large groups of people	not enjoy socializing with large groups of people	1	1	0	7	Sociability
atq_47	ATQ	47	If I think of something that needs to be done, I usually get right to work on it	get right to work on something needed to be done	0	1	0	7	Activation
atq_48	ATQ	48	It doesn’t take very much to make feel frustrated or irritated	easily feel frustrated or irritated	0	1	0	7	Frustration
atq_49	ATQ	49	It doesn't take much to evoke a happy response in me	easy to evoke a happy response	0	1	0	7	Positive Affect
atq_50	ATQ	50	When I am happy and excited about an upcoming event, I have a hard time focusing my attention on tasks that require concentration	hard time focusing on tasks when happy/excited about upcoming event	1	1	0	7	Attention
atq_51	ATQ	51	Sometimes, I feel a sense of panic or terror for no apparent reason	panic/terror for no reason	0	1	0	7	Fear
atq_52	ATQ	52	I often notice mild odors and fragrances	notice mild odors and fragrances	0	1	0	7	Neutral Sensitivity
atq_53	ATQ	53	I often have trouble resisting my cravings for food drink, etc.	not resisting cravings for food/drink	1	1	0	7	Inhibition
atq_54	ATQ	54	Colorful flashing lights bother me	bothered by colorful flashing lights	0	1	0	7	Discomfort
atq_55	ATQ	55	I usually finish doing things before they are actually due (for example, paying bills, finishing homework, etc.)	finish doing things before they are due	0	1	0	7	Activation
atq_56	ATQ	56	I often feel sad	feel sad	0	1	0	7	Sadness
atq_57	ATQ	57	I am often aware how the color and lighting of a room affects my mood	aware of how room color/lighting affects mood	0	1	0	7	Affective Sensitivity
atq_58	ATQ	58	I usually remain calm without getting frustrated when things are not going smoothly for me	calm when things are not going smoothly	1	1	0	7	Frustration
atq_59	ATQ	59	Loud music is unpleasant to me	loud music is unpleasant	0	1	0	7	Discomfort
atq_60	ATQ	60	When I'm excited about something, it's usually hard for me to resist jumping right into it before I've considered the possible consequences	hard to resist jumping in when excited without considering consequences	1	1	0	7	Inhibition
atq_61	ATQ	61	Loud noises sometimes scare me	loud noises are scary	0	1	0	7	Fear
atq_62	ATQ	62	I sometimes dream of vivid, detailed settings that are unlike anything I have experienced when awake	dream of vivid, detailed settings unlike awake experience	0	1	0	7	Associative Sensitivity
atq_63	ATQ	63	When I see an attractive item in a store, it's usually very hard for me to resist buying it	hard to resist buying attractive item in store	1	1	0	7	Inhibition
atq_64	ATQ	64	I would enjoy watching a laser show with lots of bright, colorful flashing lights	enjoy a laser show with bright, colorful, flashing lights	0	1	0	7	Pleasure
atq_65	ATQ	65	When I hear of an unhappy event, I immediately feel sad	sad when hearing of an unhappy event immediately	0	1	0	7	Sadness
atq_66	ATQ	66	When I watch a movie, I usually don't notice how the setting is used to convey the mood of the characters	not notice mood of movie characters conveyed by setting	1	1	0	7	Affective Sensitivity
atq_67	ATQ	67	I usually like to spend my free time with people	like spending free time with people	0	1	0	7	Sociability
atq_68	ATQ	68	It does not frighten me if I think that I am alone and suddenly discover someone close by	not frightened by sudden others when alone	1	1	0	7	Fear
atq_69	ATQ	69	I am often consciously aware of how the weather seems to affect my mood	aware of weather's affect on mood	0	1	0	7	Affective Sensitivity
atq_70	ATQ	70	It takes a lot to make me feel truly happy	hard to feel happy	1	1	0	7	Positive Affect
atq_71	ATQ	71	I am rarely aware of the texture of things that I hold	not aware of texture of held objects	1	1	0	7	Neutral Sensitivity
atq_72	ATQ	72	When I am afraid of how a situation might turn out, I usually avoid dealing with it	avoid dealing with fearful situations	1	1	0	7	Activation
atq_73	ATQ	73	I especially enjoy conversations where I am able to say things without thinking first	enjoy conversations with impulsive speech	0	1	0	7	Pleasure
atq_74	ATQ	74	Without applying effort, creative ideas sometimes present themselves to me	creative ideas present without effort	0	1	0	7	Associative Sensitivity
atq_75	ATQ	75	When I try something new, I am rarely concerned about the possibility of failing	not concerned about failing when trying new things	1	1	0	7	Fear
atq_76	ATQ	76	It is easy for me to inhibit fun behavior that would be inappropriate	easy to inhibit fun but inappropriate behavior	0	1	0	7	Inhibition
atq_77	ATQ	77	I would not enjoy the feeling that comes from yelling as loud as I can	not enjoy feeling of yelling loudly	1	1	0	7	Pleasure
iri_1	IRI	1	I daydream and fantasize, with some regularity, about things that might happen to me	daydream/fantasize about what might happen	0	1	0	5	Fantasy
iri_2	IRI	2	I often have tender, concerned feelings for people less fortunate than me	tender/concerned feelings for less fortunate others	0	1	0	5	Empathetic Concern
iri_3	IRI	3	I sometimes find it difficult to see things from the "other guy's" point of view	difficult to see from other point of view	1	1	0	5	Perspective Taking
iri_4	IRI	4	Sometimes I don't feel very sorry for other people when they are having problems	not sorry for others when they have problems	1	1	0	5	Empathetic Concern
iri_5	IRI	5	I really get involved with the feelings of the characters in a novel	get involved with feelings of characters from a novel	0	1	0	5	Fantasy
iri_6	IRI	6	In emergency situations, I feel apprehensive and ill-at-ease	apprehensive/not at ease in emergencies	0	1	0	5	Personal Distress
iri_7	IRI	7	I am usually objective when I watch a movie or play, and I don't often get completely caught up in it	not caught up in movie/play, objective when watching	1	1	0	5	Fantasy
iri_8	IRI	8	I try to look at everybody's side of a disagreement before I make a decision	look at all sides of a disagreement before deciding	0	1	0	5	Perspective Taking
iri_9	IRI	9	When I see someone being taken advantage of, I feel kind of protective towards them	feel protective towards others taken advantage of	0	1	0	5	Empathetic Concern
iri_10	IRI	10	I sometimes feel helpless when I am in the middle of a very emotional situation	helpless when in emotional situation	0	1	0	5	Personal Distress
iri_11	IRI	11	I sometimes try to understand my friends better by imagining how things look from their perspective	imagine friend's perspective to understand them better	0	1	0	5	Perspective Taking
iri_12	IRI	12	Becoming extremely involved in a good book or movie is somewhat rare for me	not involved in books/movies	1	1	0	5	Fantasy
iri_13	IRI	13	When I see someone get hurt, I tend to remain calm	calm when others are hurt	1	1	0	5	Personal Distress
iri_14	IRI	14	Other people's misfortunes do not usually disturb me a great deal	not disturbed by other's misfortunes	1	1	0	5	Empathetic Concern
iri_15	IRI	15	If I'm sure I'm right about something, I don't waste much time listening to other people's arguments	don't listen to other's arguments when sure	1	1	0	5	Perspective Taking
iri_16	IRI	16	After seeing a play or movie, I have felt as though I were one of the characters	felt like characters in play/movie	0	1	0	5	Fantasy
iri_17	IRI	17	Being in a tense emotional situation scares me	scared by tense emotional situations	0	1	0	5	Personal Distress
iri_18	IRI	18	When I see someone being treated unfairly, I sometimes don't feel very much pity for them	no pity when others are treated unfairly	1	1	0	5	Empathetic Concern
iri_19	IRI	19	I am usually pretty effective in dealing with emergencies	effective in dealing with emergencies	1	1	0	5	Personal Distress
iri_20	IRI	20	I am often quite touched by things that I see happen	touched by things that happen	0	1	0	5	Empathetic Concern
iri_21	IRI	21	I believe that there are two sides to every question and try to look at them both	looks at both sides of questions	0	1	0	5	Perspective Taking
iri_22	IRI	22	I would describe myself as a pretty soft-hearted person	soft-hearted	0	1	0	5	Empathetic Concern
iri_23	IRI	23	When I watch a good movie, I can very easily put myself in the place of a leading character	puts self in place of leading movie character	0	1	0	5	Fantasy
iri_24	IRI	24	I tend to lose control during emergencies	lose control during emergencies	0	1	0	5	Personal Distress
iri_25	IRI	25	When I'm upset at someone, I usually try to "put myself in his shoes" for a while	puts self in shoes of others when upset	0	1	0	5	Perspective Taking
iri_26	IRI	26	When I am reading an interesting story or novel, I imagine how I would feel if the events in the story were happening to me	imagine self in story events when reading	0	1	0	5	Fantasy
iri_27	IRI	27	When I see someone who badly needs help in an emergency, I go to pieces	goes to pieces when other needs help in an emergency	0	1	0	5	Personal Distress
iri_28	IRI	28	Before criticizing somebody, I try to imagine how I would feel if I were in their place	imagines how other feels before criticizing	0	1	0	5	Perspective Taking
pss_1	PSS	1	Did you feel upset about something that happened unexpectedly?	upset about unexpected happening	0	1	0	5	Stress
pss_2	PSS	2	Did you have the feeling that you were not able to control important things in your life?	feel no control over important things	0	1	0	5	Stress
pss_3	PSS	3	Did you feel nervous and stressed out?	nervous/stressed	0	1	0	5	Stress
pss_4	PSS	4	Did you overcome little daily hassles with satisfaction?	overcome daily hassles with satisfaction	1	1	0	5	Stress
pss_5	PSS	5	Did you deal positively with important life changes?	deal positively with life changes	1	1	0	5	Stress
pss_6	PSS	6	Did you successfully overcome personal problems?	overcome personal problems	1	1	0	5	Stress
pss_7	PSS	7	Did things go just the way you want them to?	things go in desired way	1	1	0	5	Stress
pss_8	PSS	8	Did you have problems in coping with everyday problems?	not coping with everyday problems	0	1	0	5	Stress
pss_9	PSS	9	Did you successfully cope with anger in your life?	coping with anger	1	1	0	5	Stress
pss_10	PSS	10	Did you have the feeling that everything was under control?	feel that everything is under control	1	1	0	5	Stress
pss_11	PSS	11	Did you feel that things were out of control?	feel that things are out of control	0	1	0	5	Stress
pss_12	PSS	12	Did you notice that you were thinking about goals you still had to reach?	thinking about unreached goals	0	1	0	5	Stress
pss_13	PSS	13	Did you feel to be in charge of your time?	feel in charge of own time	1	1	0	5	Stress
pss_14	PSS	14	Did you have the feeling that difficulties were so overwhelming that you could not cope with them?	cannot cope with difficulties	0	1	0	5	Stress
psqi_1	PSQI	1	Cannot get to sleep within 30 minutes	no sleep within 30 minutes	0	1	0	4	Sleep
psqi_2	PSQI	2	Wake up in the middle of the night or early morning	wake up at night	0	1	0	4	Sleep
psqi_3	PSQI	3	Have to get up to use the bathroom	wake up for bathroom	0	1	0	4	Sleep
psqi_4	PSQI	4	Cannot breathe comfortably	cannot breathe comfortably	0	1	0	4	Sleep
psqi_5	PSQI	5	Cough or snore loudly	cough/snore loudly	0	1	0	4	Sleep
psqi_6	PSQI	6	Feel too cold	feel too cold	0	1	0	4	Sleep
psqi_7	PSQI	7	Feel too hot	feel too hot	0	1	0	4	Sleep
psqi_8	PSQI	8	Had bad dreams	have bad dreams	0	1	0	4	Sleep
psqi_9	PSQI	9	Have pain	have pain	0	1	0	4	Sleep
psqi_10	PSQI	10	During the past month, how would you rate your sleep quality overall?	sleep quality	1	1	0	4	Sleep
psqi_11	PSQI	11	During the past month, how often have you taken medicine (prescribed or "over the counter") to help you sleep?	sleep medicine	0	1	0	4	Sleep
psqi_12	PSQI	12	During the past month, how often have you had trouble staying awake while driving, eating meals, or engaging in social activity?	not staying awake	0	1	0	4	Sleep
psqi_13	PSQI	13	During the past month, how much of a problem has it been for you to keep up enough enthusiasm to get things done?	cannot keep up enthusiasm	0	1	0	4	Sleep
psqi_14	PSQI	14	Do you have a bed partner or roommate?	bed partner/roommate	0	0	0	4	Sleep
brief_1	BRIEF-A	1	redacted	angry outbursts	0	1	0	3	Emotional Control	Negativity
brief_2	BRIEF-A	2	redacted	careless errors when completing tasks	0	1	0	3	Task Monitor	Inconsistency
brief_3	BRIEF-A	3	redacted	disorganized	0	1	0	3	Org. of Materials
brief_4	BRIEF-A	4	redacted	not concentrating on tasks	0	1	0	3	Working Memory
brief_5	BRIEF-A	5	redacted	tap fingers/bounce legs	0	1	0	3	Inhibit
brief_6	BRIEF-A	6	redacted	need reminders to begin task when willing	0	1	0	3	Initiate
brief_7	BRIEF-A	7	redacted	messy closet	0	1	0	3	Org. of Materials
brief_8	BRIEF-A	8	redacted	trouble changing from one task to another	0	1	0	3	Shift	Negativity
brief_9	BRIEF-A	9	redacted	overwhelmed by large tasks	0	1	0	3	Plan/Organize
brief_10	BRIEF-A	10	redacted	forget name	0	1	0	3	Infrequency	Infrequency
brief_11	BRIEF-A	11	redacted	trouble with tasks with more than one step	0	1	0	3	Working Memory
brief_12	BRIEF-A	12	redacted	overreact emotionally	0	1	0	3	Emotional Control
brief_13	BRIEF-A	13	redacted	not noticing when others feel bad/mad because of me	0	1	0	3	Self-Monitor
brief_14	BRIEF-A	14	redacted	trouble getting ready for day	0	1	0	3	Initiate
brief_15	BRIEF-A	15	redacted	trouble prioritizing activities	0	1	0	3	Plan/Organize
brief_16	BRIEF-A	16	redacted	not sitting still	0	1	0	3	Inhibit
brief_17	BRIEF-A	17	redacted	forgets task in the middle of things	0	1	0	3	Working Memory
brief_18	BRIEF-A	18	redacted	not checking work for mistakes	0	1	0	3	Task Monitor
brief_19	BRIEF-A	19	redacted	emotional outbursts for little reason	0	1	0	3	Emotional Control	Negativity
brief_20	BRIEF-A	20	redacted	lie around the house a lot	0	1	0	3	Initiate
brief_21	BRIEF-A	21	redacted	start tasks without correct materials	0	1	0	3	Plan/Organize	Negativity
brief_22	BRIEF-A	22	redacted	not accepting different ways to solve problems	0	1	0	3	Shift	Negativity
brief_23	BRIEF-A	23	redacted	talking at the wrong time	0	1	0	3	Self-Monitor	Negativity
brief_24	BRIEF-A	24	redacted	misjudging task difficulty	0	1	0	3	Task Monitor
brief_25	BRIEF-A	25	redacted	problems getting started on own	0	1	0	3	Initiate	Inconsistency
brief_26	BRIEF-A	26	redacted	not staying on same topic when talking	0	1	0	3	Working Memory
brief_27	BRIEF-A	27	redacted	getting tired	0	1	0	3	Infrequency	Infrequency
brief_28	BRIEF-A	28	redacted	reacting more emotionally than friends	0	1	0	3	Emotional Control	Inconsistency
brief_29	BRIEF-A	29	redacted	problems waiting for turn	0	1	0	3	Inhibit	Negativity
brief_30	BRIEF-A	30	redacted	disorganized (by others)	0	1	0	3	Org. of Materials
brief_31	BRIEF-A	31	redacted	losing things	0	1	0	3	Org. of Materials
brief_32	BRIEF-A	32	redacted	not thinking of different ways of problem solving when stuck	0	1	0	3	Shift
brief_33	BRIEF-A	33	redacted	overreact to small problems	0	1	0	3	Emotional Control	Inconsistency
brief_34	BRIEF-A	34	redacted	not planning ahead for future activities	0	1	0	3	Plan/Organize	Inconsistency
brief_35	BRIEF-A	35	redacted	short attention span	0	1	0	3	Working Memory
brief_36	BRIEF-A	36	redacted	inappropriate sexual comments	0	1	0	3	Inhibit	Negativity
brief_37	BRIEF-A	37	redacted	not understanding why others are upset	0	1	0	3	Self-Monitor
brief_38	BRIEF-A	38	redacted	trouble counting to three	0	1	0	3	Infrequency	Infrequency
brief_39	BRIEF-A	39	redacted	unrealistic goals	0	1	0	3	Plan/Organize	Negativity
brief_40	BRIEF-A	40	redacted	messy bathroom	0	1	0	3	Org. of Materials	Negativity
brief_41	BRIEF-A	41	redacted	careless mistakes	0	1	0	3	Task Monitor	Inconsistency
brief_42	BRIEF-A	42	redacted	emotionally upset easily	0	1	0	3	Emotional Control	Inconsistency
brief_43	BRIEF-A	43	redacted	decisions that get self into trouble	0	1	0	3	Inhibit
brief_44	BRIEF-A	44	redacted	bothered by dealing with changes	0	1	0	3	Shift	Inconsistency
brief_45	BRIEF-A	45	redacted	difficulty getting excited about things	0	1	0	3	Initiate
brief_46	BRIEF-A	46	redacted	forget instructions easily	0	1	0	3	Working Memory	Inconsistency
brief_47	BRIEF-A	47	redacted	cannot get good ideas on paper	0	1	0	3	Plan/Organize
brief_48	BRIEF-A	48	redacted	make mistakes	0	1	0	3	Infrequency	Infrequency
brief_49	BRIEF-A	49	redacted	trouble starting tasks	0	1	0	3	Initiate	Inconsistency
brief_50	BRIEF-A	50	redacted	saying without thinking	0	1	0	3	Self-Monitor
brief_51	BRIEF-A	51	redacted	intense anger that ends quickly	0	1	0	3	Emotional Control
brief_52	BRIEF-A	52	redacted	not finishing tasks	0	1	0	3	Task Monitor	Inconsistency
brief_53	BRIEF-A	53	redacted	start things last minute	0	1	0	3	Initiate
brief_54	BRIEF-A	54	redacted	difficulty finishing tasks on own	0	1	0	3	Plan/Organize
brief_55	BRIEF-A	55	redacted	easily distracted (by others)	0	1	0	3	Inhibit
brief_56	BRIEF-A	56	redacted	trouble remembering, short-term	0	1	0	3	Working Memory	Inconsistency
brief_57	BRIEF-A	57	redacted	too emotional (by others)	0	1	0	3	Emotional Control
brief_58	BRIEF-A	58	redacted	rushes	0	1	0	3	Inhibit
brief_59	BRIEF-A	59	redacted	gets annoyed	0	1	0	3	Infrequency	Infrequency
brief_60	BRIEF-A	60	redacted	messy room/home	0	1	0	3	Org. of Materials	Inconsistency
brief_61	BRIEF-A	61	redacted	disturbed by unexpected routine changes	0	1	0	3	Shift	Inconsistency
brief_62	BRIEF-A	62	redacted	trouble with ideas for free time	0	1	0	3	Initiate
brief_63	BRIEF-A	63	redacted	not planning ahead for tasks	0	1	0	3	Plan/Organize	Inconsistency
brief_64	BRIEF-A	64	redacted	not thinking before acting (by others)	0	1	0	3	Self-Monitor	Inconsistency
brief_65	BRIEF-A	65	redacted	trouble finding things	0	1	0	3	Org. of Materials
brief_66	BRIEF-A	66	redacted	problems organizing activities	0	1	0	3	Plan/Organize
brief_67	BRIEF-A	67	redacted	stuck on past problems	0	1	0	3	Shift
brief_68	BRIEF-A	68	redacted	trouble doing multiple things at once	0	1	0	3	Working Memory
brief_69	BRIEF-A	69	redacted	mood changes frequently	0	1	0	3	Emotional Control
brief_70	BRIEF-A	70	redacted	not thinking of consequences before doing	0	1	0	3	Self-Monitor	Inconsistency
brief_71	BRIEF-A	71	redacted	trouble organizing work	0	1	0	3	Plan/Organize
brief_72	BRIEF-A	72	redacted	upset quickly/easily	0	1	0	3	Emotional Control	Inconsistency
brief_73	BRIEF-A	73	redacted	impulsive	0	1	0	3	Inhibit
brief_74	BRIEF-A	74	redacted	not picking up after self	0	1	0	3	Org. of Materials	Inconsistency
brief_75	BRIEF-A	75	redacted	not completing work	0	1	0	3	Task Monitor	Inconsistency
bsi_1	BSI	1	redacted	nervous/shaky inside	0	1	0	5	Anxiety
bsi_2	BSI	2	redacted	faint/dizzy	0	1	0	5	Somatization
bsi_3	BSI	3	redacted	thoughts controlled by others	0	1	0	5	Psychoticism
bsi_4	BSI	4	redacted	others are to blame for troubles	0	1	0	5	Paranoid Ideation
bsi_5	BSI	5	redacted	trouble remembering	0	1	0	5	Obsession-Compulsion
bsi_6	BSI	6	redacted	easily annoyed/irritated	0	1	0	5	Hostility
bsi_7	BSI	7	redacted	pains in heart/chest	0	1	0	5	Somatization
bsi_8	BSI	8	redacted	afraid in open spaces/streets	0	1	0	5	Phobic Anxiety
bsi_9	BSI	9	redacted	thoughts of ending life	0	0	1	5	Depression
bsi_10	BSI	10	redacted	feel others cannot be trusted	0	1	0	5	Paranoid Ideation
bsi_11	BSI	11	redacted	poor appetite	0	1	0	5	Additional
bsi_12	BSI	12	redacted	scared suddenly for no reason	0	1	0	5	Anxiety
bsi_13	BSI	13	redacted	uncontrolled temper outbursts	0	1	0	5	Hostility
bsi_14	BSI	14	redacted	lonely with others	0	1	0	5	Psychoticism
bsi_15	BSI	15	redacted	blocked in doing things	0	1	0	5	Obsession-Compulsion
bsi_16	BSI	16	redacted	feel lonely	0	1	0	5	Depression
bsi_17	BSI	17	redacted	feel blue	0	1	0	5	Depression
bsi_18	BSI	18	redacted	feel no interest in things	0	1	0	5	Depression
bsi_19	BSI	19	redacted	feel fearful	0	1	0	5	Anxiety
bsi_20	BSI	20	redacted	feelings easily hurt	0	1	0	5	Interpersonal Sensitivity
bsi_21	BSI	21	redacted	feel others are unfriendly/disliking	0	1	0	5	Interpersonal Sensitivity
bsi_22	BSI	22	redacted	feel inferior to others	0	1	0	5	Interpersonal Sensitivity
bsi_23	BSI	23	redacted	nausea/upset stomach	0	1	0	5	Somatization
bsi_24	BSI	24	redacted	feel watched/talked about by others	0	1	0	5	Paranoid Ideation
bsi_25	BSI	25	redacted	trouble falling asleep	0	1	0	5	Additional
bsi_26	BSI	26	redacted	checking actions repeatedly	0	1	0	5	Obsession-Compulsion
bsi_27	BSI	27	redacted	difficulty making decisions	0	1	0	5	Obsession-Compulsion
bsi_28	BSI	28	redacted	afraid to travel on public transport	0	1	0	5	Phobic Anxiety
bsi_29	BSI	29	redacted	trouble getting breath	0	1	0	5	Somatization
bsi_30	BSI	30	redacted	hot/cold spells	0	1	0	5	Somatization
bsi_31	BSI	31	redacted	avoid things due to fear	0	1	0	5	Phobic Anxiety
bsi_32	BSI	32	redacted	mind going blank	0	1	0	5	Obsession-Compulsion
bsi_33	BSI	33	redacted	numbness/tingling in body	0	1	0	5	Somatization
bsi_34	BSI	34	redacted	self should be punished for sins	0	1	0	5	Psychoticism
bsi_35	BSI	35	redacted	hopeless about future	0	1	0	5	Depression
bsi_36	BSI	36	redacted	trouble concentrating	0	1	0	5	Obsession-Compulsion
bsi_37	BSI	37	redacted	feel weak in body	0	1	0	5	Somatization
bsi_38	BSI	38	redacted	feel tense/keyed up	0	1	0	5	Anxiety
bsi_39	BSI	39	redacted	thoughts of death/dying	0	0	1	5	Additional
bsi_40	BSI	40	redacted	urges to harm others	0	0	1	5	Hostility
bsi_41	BSI	41	redacted	urges to break/smash things	0	1	0	5	Hostility
bsi_42	BSI	42	redacted	self-conscious with others	0	1	0	5	Interpersonal Sensitivity
bsi_43	BSI	43	redacted	uneasy in crowds	0	1	0	5	Phobic Anxiety
bsi_44	BSI	44	redacted	not feeling close to others	0	1	0	5	Psychoticism
bsi_45	BSI	45	redacted	terror/panic spells	0	1	0	5	Anxiety
bsi_46	BSI	46	redacted	frequently arguing	0	1	0	5	Hostility
bsi_47	BSI	47	redacted	nervous when alone	0	1	0	5	Phobic Anxiety
bsi_48	BSI	48	redacted	others not giving credit for personal achievements	0	1	0	5	Paranoid Ideation
bsi_49	BSI	49	redacted	restless, cannot sit still	0	1	0	5	Anxiety
bsi_50	BSI	50	redacted	feel worthless	0	1	0	5	Depression
bsi_51	BSI	51	redacted	feel others will take advantage	0	1	0	5	Paranoid Ideation
bsi_52	BSI	52	redacted	feel guilt	0	1	0	5	Additional
bsi_53	BSI	53	redacted	something wrong with own mind	0	1	0	5	Psychoticism
panas_1	PANAS-X	1	cheerful	cheerful	0	1	0	5	Joviality
panas_2	PANAS-X	2	disgusted	disgusted	0	1	0	5	Hostility
panas_3	PANAS-X	3	attentive	attentive	0	1	0	5	Attentiveness	Positive Affect
panas_4	PANAS-X	4	bashful	bashful	0	1	0	5	Shyness
panas_5	PANAS-X	5	sluggish	sluggish	0	1	0	5	Fatigue
panas_6	PANAS-X	6	daring	daring	0	1	0	5	Self-Assurance
panas_7	PANAS-X	7	surprised	surprised	0	1	0	5	Surprise
panas_8	PANAS-X	8	strong	strong	0	1	0	5	Self-Assurance	Positive Affect
panas_9	PANAS-X	9	scornful	scornful	0	1	0	5	Hostility
panas_10	PANAS-X	10	relaxed	relaxed	0	1	0	5	Serenity
panas_11	PANAS-X	11	irritable	irritable	0	1	0	5	Hostility	Negative Affect
panas_12	PANAS-X	12	delighted	delighted	0	1	0	5	Joviality
panas_13	PANAS-X	13	inspired	inspired	0	1	0	5	Positive Affect	Positive Affect
panas_14	PANAS-X	14	fearless	fearless	0	1	0	5	Self-Assurance
panas_15	PANAS-X	15	disgusted with self	disgusted with self	0	1	0	5	Guilt
panas_16	PANAS-X	16	sad	sad	0	1	0	5	Sadness
panas_17	PANAS-X	17	calm	calm	0	1	0	5	Serenity
panas_18	PANAS-X	18	afraid	afraid	0	1	0	5	Fear	Negative Affect
panas_19	PANAS-X	19	tired	tired	0	1	0	5	Fatigue
panas_20	PANAS-X	20	amazed	amazed	0	1	0	5	Surprise
panas_21	PANAS-X	21	shaky	shaky	0	1	0	5	Fear
panas_22	PANAS-X	22	happy	happy	0	1	0	5	Joviality
panas_23	PANAS-X	23	timid	timid	0	1	0	5	Shyness
panas_24	PANAS-X	24	alone	alone	0	1	0	5	Sadness
panas_25	PANAS-X	25	alert	alert	0	1	0	5	Attentiveness	Positive Affect
panas_26	PANAS-X	26	upset	upset	0	1	0	5	Negative Affect	Negative Affect
panas_27	PANAS-X	27	angry	angry	0	1	0	5	Hostility
panas_28	PANAS-X	28	bold	bold	0	1	0	5	Self-Assurance
panas_29	PANAS-X	29	blue	blue	0	1	0	5	Sadness
panas_30	PANAS-X	30	shy	shy	0	1	0	5	Shyness
panas_31	PANAS-X	31	active	active	0	1	0	5	Positive Affect	Positive Affect
panas_32	PANAS-X	32	guilty	guilty	0	1	0	5	Guilt	Negative Affect
panas_33	PANAS-X	33	joyful	joyful	0	1	0	5	Joviality
panas_34	PANAS-X	34	nervous	nervous	0	1	0	5	Fear	Negative Affect
panas_35	PANAS-X	35	lonely	lonely	0	1	0	5	Sadness
panas_36	PANAS-X	36	sleepy	sleepy	0	1	0	5	Fatigue
panas_37	PANAS-X	37	excited	excited	0	1	0	5	Joviality	Positive Affect
panas_38	PANAS-X	38	hostile	hostile	0	1	0	5	Hostility	Negative Affect
panas_39	PANAS-X	39	proud	proud	0	1	0	5	Self-Assurance	Positive Affect
panas_40	PANAS-X	40	jittery	jittery	0	1	0	5	Fear	Negative Affect
panas_41	PANAS-X	41	lively	lively	0	1	0	5	Joviality
panas_42	PANAS-X	42	ashamed	ashamed	0	1	0	5	Guilt	Negative Affect
panas_43	PANAS-X	43	at ease	at ease	0	1	0	5	Serenity
panas_44	PANAS-X	44	scared	scared	0	1	0	5	Fear	Negative Affect
panas_45	PANAS-X	45	drowsy	drowsy	0	1	0	5	Fatigue
panas_46	PANAS-X	46	angry at self	angry at self	0	1	0	5	Guilt
panas_47	PANAS-X	47	enthusiastic	enthusiastic	0	1	0	5	Joviality	Positive Affect
panas_48	PANAS-X	48	downhearted	downhearted	0	1	0	5	Sadness
panas_49	PANAS-X	49	sheepish	sheepish	0	1	0	5	Shyness
panas_50	PANAS-X	50	distressed	distressed	0	1	0	5	Negative Affect	Negative Affect
panas_51	PANAS-X	51	blameworthy	blameworthy	0	1	0	5	Guilt
panas_52	PANAS-X	52	determined	determined	0	1	0	5	Attentiveness	Positive Affect
panas_53	PANAS-X	53	frightened	frightened	0	1	0	5	Fear
panas_54	PANAS-X	54	astonished	astonished	0	1	0	5	Surprise
panas_55	PANAS-X	55	interested	interested	0	1	0	5	Positive Affect	Positive Affect
panas_56	PANAS-X	56	loathing	loathing	0	1	0	5	Hostility
panas_57	PANAS-X	57	confident	confident	0	1	0	5	Self-Assurance
panas_58	PANAS-X	58	energetic	energetic	0	1	0	5	Joviality
panas_59	PANAS-X	59	concentrating	concentrating	0	1	0	5	Attentiveness
panas_60	PANAS-X	60	dissatisfied with self	dissatisfied with self	0	1	0	5	Guilt

## Sheet: Supplementary Table 3
item_index	mean	std	skewness	kurtosis	prop_floor	prop_ceiling
atq_1	0.310155	0.285728	0.598472	-0.911917	0.264901	0.0165563
atq_2	0.34851	0.329819	0.437844	-1.20384	0.324503	0.0529801
atq_3	0.549117	0.289038	-0.397063	-0.806453	0.0860927	0.0827815
atq_4	0.570916	0.305688	-0.516786	-0.875207	0.0993377	0.0993377
atq_5	0.377483	0.303679	0.39415	-0.935554	0.211921	0.0562914
atq_6	0.490342	0.316321	0.092567	-1.1809	0.109272	0.112583
atq_7	0.477373	0.345759	0.00274549	-1.31222	0.201987	0.129139
atq_8	0.35734	0.303022	0.436885	-0.985671	0.241722	0.0430464
atq_9	0.383278	0.318413	0.506255	-0.91376	0.201987	0.0860927
atq_10	0.391832	0.286476	0.368786	-0.729472	0.168874	0.0496689
atq_11	0.621689	0.335851	-0.580403	-0.973292	0.109272	0.225166
atq_12	0.571744	0.348233	-0.379069	-1.1963	0.142384	0.208609
atq_13	0.703366	0.280669	-0.939123	0.0553967	0.0430464	0.258278
atq_14	0.38245	0.322609	0.385757	-1.09028	0.241722	0.0695364
atq_15	0.729581	0.228135	-1.13199	1.23266	0.0231788	0.188742
atq_16	0.459161	0.322479	0.0322973	-1.2504	0.165563	0.0860927
atq_17	0.522351	0.289524	-0.376943	-0.784681	0.112583	0.0728477
atq_18	0.602097	0.296509	-0.61446	-0.617555	0.0827815	0.122517
atq_19	0.528974	0.302357	-0.104698	-1.06478	0.0827815	0.112583
atq_20	0.338576	0.291926	0.767261	-0.424206	0.192053	0.0562914
atq_21	0.677704	0.282565	-0.911464	0.0286284	0.0562914	0.201987
atq_22	0.202263	0.256689	1.13179	0.148921	0.476821	0.00993377
atq_23	0.528974	0.325577	-0.147426	-1.17867	0.119205	0.142384
atq_24	0.71606	0.235551	-1.03827	1.096	0.0331126	0.192053
atq_25	0.451711	0.338879	0.0860478	-1.33319	0.195364	0.10596
atq_26	0.596302	0.295768	-0.387372	-0.909159	0.0596026	0.142384
atq_27	0.690949	0.23941	-0.91912	0.535109	0.0231788	0.15894
atq_28	0.470199	0.312742	0.0798318	-1.09504	0.135762	0.0960265
atq_29	0.49117	0.316381	-0.036637	-1.23355	0.119205	0.0927152
atq_30	0.397351	0.321487	0.280337	-1.1429	0.235099	0.0662252
atq_31	0.354305	0.285738	0.43069	-0.99474	0.198675	0.0198675
atq_32	0.541667	0.315976	-0.363704	-1.0193	0.129139	0.112583
atq_33	0.440121	0.317998	0.222501	-1.18946	0.149007	0.0794702
atq_34	0.344647	0.273298	0.58583	-0.572909	0.175497	0.0298013
atq_35	0.619481	0.268045	-0.490608	-0.539764	0.0364238	0.129139
atq_36	0.620861	0.313235	-0.6946	-0.563174	0.10596	0.182119
atq_37	0.602097	0.277871	-0.459939	-0.689814	0.0463576	0.115894
atq_38	0.660044	0.272141	-0.597615	-0.519976	0.0264901	0.188742
atq_39	0.549669	0.333911	-0.31808	-1.21683	0.122517	0.145695
atq_40	0.639625	0.280413	-0.713028	-0.339087	0.0529801	0.152318
atq_41	0.55436	0.325648	-0.341392	-1.08431	0.125828	0.145695
atq_42	0.34713	0.304381	0.433783	-1.0321	0.268212	0.0364238
atq_43	0.610099	0.30484	-0.390091	-1.03726	0.0463576	0.182119
atq_44	0.379415	0.343446	0.486513	-1.11097	0.268212	0.10596
atq_45	0.479029	0.353321	0.0193791	-1.42436	0.188742	0.139073
atq_46	0.435982	0.319904	0.200103	-1.17568	0.168874	0.0827815
atq_47	0.606236	0.283847	-0.476502	-0.757833	0.0496689	0.125828
atq_48	0.401766	0.285717	0.319844	-0.940216	0.13245	0.0430464
atq_49	0.629139	0.254924	-0.741304	-0.105532	0.0397351	0.0860927
atq_50	0.487031	0.281049	-0.159391	-0.973029	0.10596	0.0397351
atq_51	0.291667	0.340439	0.753503	-0.915344	0.453642	0.0629139
atq_52	0.575883	0.308629	-0.504646	-0.863223	0.0993377	0.122517
atq_53	0.52787	0.315308	-0.278895	-1.15502	0.115894	0.0927152
atq_54	0.429084	0.316516	0.130024	-1.18664	0.188742	0.0728477
atq_55	0.584437	0.324493	-0.388754	-1.09064	0.0960265	0.172185
atq_56	0.385762	0.332865	0.434991	-1.13192	0.231788	0.089404
atq_57	0.493102	0.32346	-0.162326	-1.17742	0.168874	0.0927152
atq_58	0.574503	0.28207	-0.289642	-0.906247	0.0496689	0.10596
atq_59	0.424393	0.297391	0.191946	-0.992514	0.15894	0.0562914
atq_60	0.461093	0.305041	0.113634	-1.07878	0.125828	0.0827815
atq_61	0.477097	0.329441	-0.105143	-1.27585	0.18543	0.089404
atq_62	0.508554	0.364662	-0.0902401	-1.39972	0.205298	0.195364
atq_63	0.363135	0.318806	0.402237	-1.20037	0.254967	0.0430464
atq_64	0.503035	0.314186	-0.0618796	-1.06632	0.122517	0.119205
atq_65	0.527318	0.271141	-0.398559	-0.72528	0.0794702	0.0496689
atq_66	0.350166	0.259495	0.458246	-0.580768	0.162252	0.0231788
atq_67	0.566777	0.280737	-0.279007	-0.816855	0.0562914	0.102649
atq_68	0.43074	0.285233	0.124231	-1.04773	0.13245	0.0331126
atq_69	0.625276	0.288495	-0.797352	-0.202961	0.0827815	0.139073
atq_70	0.452539	0.33568	0.220085	-1.25164	0.165563	0.122517
atq_71	0.346302	0.28714	0.500542	-0.811646	0.215232	0.0331126
atq_72	0.510486	0.303299	-0.172125	-1.06497	0.10596	0.089404
atq_73	0.586093	0.298021	-0.458394	-0.726247	0.0827815	0.139073
atq_74	0.630519	0.277434	-0.572029	-0.496798	0.0430464	0.155629
atq_75	0.432671	0.292283	0.167395	-0.998056	0.139073	0.0529801
atq_76	0.610651	0.318921	-0.606942	-0.778079	0.10596	0.175497
atq_77	0.527594	0.329185	-0.0880389	-1.25092	0.10596	0.152318
iri_1	0.53394	0.329676	-0.242257	-1.07141	0.162252	0.165563
iri_2	0.691225	0.28322	-0.779587	-0.0582842	0.0562914	0.304636
iri_3	0.246689	0.253688	1.05834	0.744948	0.370861	0.0298013
iri_4	0.247517	0.272824	0.997142	0.232405	0.42053	0.0331126
iri_5	0.561672	0.31368	-0.372487	-0.79426	0.135762	0.168874
iri_6	0.392384	0.308396	0.297109	-0.986244	0.241722	0.0662252
iri_7	0.352649	0.288586	0.504175	-0.584001	0.251656	0.0529801
iri_8	0.759106	0.241379	-1.09318	1.18021	0.0298013	0.360927
iri_9	0.819123	0.226542	-1.50949	2.51808	0.0231788	0.493377
iri_10	0.519454	0.309532	-0.127523	-1.00719	0.125828	0.13245
iri_11	0.740894	0.236162	-0.898639	0.640529	0.0198675	0.311258
iri_12	0.277318	0.301365	0.906597	-0.182215	0.407285	0.0562914
iri_13	0.516556	0.29059	-0.129014	-0.842675	0.10596	0.10596
iri_14	0.269868	0.265739	0.93866	0.335368	0.344371	0.0364238
iri_15	0.421358	0.29359	0.246871	-0.815003	0.175497	0.0728477
iri_16	0.399834	0.334393	0.258259	-1.20243	0.288079	0.089404
iri_17	0.463162	0.314613	0.108223	-1.06626	0.165563	0.109272
iri_18	0.141556	0.223317	1.80309	3.10052	0.625828	0.0165563
iri_19	0.703642	0.246072	-0.460119	-0.614665	0.00662252	0.281457
iri_20	0.675497	0.243341	-0.501748	-0.178166	0.0198675	0.215232
iri_21	0.761175	0.250268	-0.963959	0.473049	0.0231788	0.400662
iri_22	0.71399	0.253089	-0.744665	0.116041	0.0264901	0.298013
iri_23	0.547185	0.321645	-0.270558	-0.964918	0.142384	0.172185
iri_24	0.173841	0.203771	1.08954	0.852215	0.490066	0.00331126
iri_25	0.583609	0.293628	-0.400295	-0.611998	0.0927152	0.165563
iri_26	0.582781	0.319262	-0.454744	-0.851419	0.125828	0.188742
iri_27	0.229305	0.25409	0.964801	0.201851	0.437086	0.0165563
iri_28	0.670944	0.254955	-0.597979	0.0173176	0.0364238	0.225166
pss_1	0.44495	0.258817	0.232318	-0.218016	0.109272	0.0695364
pss_2	0.430877	0.321942	0.187847	-1.00173	0.228477	0.109272
pss_3	0.565811	0.283225	-0.213934	-0.532491	0.0827815	0.15894
pss_4	0.684189	0.253022	-0.668062	0.177704	0.0364238	0.241722
pss_5	0.720613	0.220934	-0.606239	0.171833	0.00993377	0.251656
pss_6	0.676738	0.233383	-0.34324	-0.295038	0.013245	0.215232
pss_7	0.53601	0.24133	-0.139582	-0.063816	0.0562914	0.0794702
pss_8	0.360513	0.267741	0.486153	-0.421975	0.195364	0.0397351
pss_9	0.723924	0.240243	-0.531748	-0.280666	0.013245	0.317881
pss_10	0.591474	0.270281	-0.307728	-0.542871	0.0529801	0.149007
pss_11	0.412666	0.30274	0.355281	-0.756599	0.192053	0.0927152
pss_12	0.750414	0.259075	-1.09659	1.02749	0.0463576	0.380795
pss_13	0.673013	0.241921	-0.584045	0.0986085	0.0264901	0.201987
pss_14	0.330712	0.316612	0.63832	-0.671917	0.34106	0.0761589
psqi_1	0.460265	0.375126	0.207423	-1.32983	0.278146	0.235099
psqi_2	0.512141	0.376055	-0.0628679	-1.37487	0.248344	0.261589
psqi_3	0.391832	0.361337	0.400099	-1.15124	0.354305	0.15894
psqi_4	0.0794702	0.211199	2.89773	8.01606	0.847682	0.0231788
psqi_5	0.125828	0.289452	2.2399	3.6384	0.807947	0.0728477
psqi_6	0.209713	0.296692	1.24925	0.516782	0.596026	0.0529801
psqi_7	0.328918	0.341509	0.620605	-0.851102	0.423841	0.10596
psqi_8	0.239514	0.303223	1.08773	0.201735	0.529801	0.0629139
psqi_9	0.142384	0.280995	1.89632	2.42272	0.754967	0.0496689
psqi_10	0.364238	0.248587	0.426814	0.0779136	0.195364	0.0397351
psqi_11	0.206402	0.348603	1.41906	0.464144	0.692053	0.115894
psqi_12	0.161148	0.260205	1.56611	1.66259	0.665563	0.0298013
psqi_13	0.350993	0.322156	0.557622	-0.687793	0.34106	0.0993377
psqi_14	0.450331	0.386556	0.0953812	-1.46761	0.347682	0.208609
brief_1	0.181291	0.27119	1.14007	0.263141	0.668874	0.0298013
brief_2	0.342715	0.275096	0.00774221	-0.656175	0.357616	0.0430464
brief_3	0.370861	0.34082	0.373713	-0.84724	0.39404	0.135762
brief_4	0.43957	0.370012	0.192358	-1.15637	0.34106	0.218543
brief_5	0.463576	0.380589	0.122466	-1.26067	0.327815	0.254967
brief_6	0.205298	0.319736	1.29142	0.47332	0.672185	0.0827815
brief_7	0.380795	0.396029	0.449724	-1.26665	0.460265	0.221854
brief_8	0.261589	0.309508	0.753757	-0.422827	0.543046	0.0662252
brief_9	0.430464	0.37372	0.230883	-1.17919	0.357616	0.218543
brief_10	0.00993377	0.0698883	6.8814	45.3536	0.980132	0
brief_11	0.153974	0.255115	1.34752	0.808801	0.715232	0.0231788
brief_12	0.30298	0.331248	0.636847	-0.640592	0.493377	0.0993377
brief_13	0.165563	0.26238	1.25961	0.577856	0.695364	0.0264901
brief_14	0.213576	0.328463	1.25605	0.327444	0.665563	0.0927152
brief_15	0.316225	0.3388	0.603094	-0.717376	0.480132	0.112583
brief_16	0.312086	0.347743	0.655956	-0.744195	0.5	0.122517
brief_17	0.246689	0.322839	0.951829	-0.202233	0.589404	0.0827815
brief_18	0.247517	0.288545	0.655701	-0.579147	0.546358	0.0397351
brief_19	0.14404	0.257668	1.57309	1.56392	0.741722	0.0298013
brief_20	0.395695	0.373385	0.357922	-1.13529	0.403974	0.195364
brief_21	0.210265	0.301702	1.12512	0.226602	0.639073	0.0596026
brief_22	0.150662	0.25384	1.38879	0.935364	0.721854	0.0231788
brief_23	0.248344	0.307028	0.831837	-0.312463	0.566225	0.0629139
brief_24	0.369205	0.299965	0.176054	-0.553929	0.344371	0.0827815
brief_25	0.256623	0.304243	0.746968	-0.420728	0.546358	0.0596026
brief_26	0.286424	0.350483	0.812193	-0.588506	0.549669	0.122517
brief_27	0.620861	0.320084	-0.262792	-0.682736	0.112583	0.354305
brief_28	0.298841	0.356907	0.758493	-0.706761	0.536424	0.13245
brief_29	0.15894	0.269556	1.4627	1.19476	0.718543	0.0364238
brief_30	0.211921	0.325735	1.25858	0.354552	0.665563	0.089404
brief_31	0.307947	0.35466	0.705173	-0.741009	0.516556	0.13245
brief_32	0.238411	0.30135	0.864231	-0.251654	0.57947	0.0562914
brief_33	0.246689	0.315026	0.903082	-0.236568	0.57947	0.0728477
brief_34	0.22351	0.305884	1.03121	0.0225153	0.615894	0.0629139
brief_35	0.384106	0.373293	0.403239	-1.1139	0.42053	0.188742
brief_36	0.0662252	0.183863	2.75226	7.17839	0.877483	0.00993377
brief_37	0.182119	0.290968	1.35125	0.806221	0.688742	0.0529801
brief_38	0.00331126	0.0406218	12.1658	146.007	0.993377	0
brief_39	0.212748	0.274276	0.796217	-0.476222	0.602649	0.0264901
brief_40	0.110927	0.223487	1.77674	2.19426	0.791391	0.013245
brief_41	0.305464	0.300241	0.408743	-0.693816	0.450331	0.0596026
brief_42	0.284768	0.353012	0.830672	-0.584203	0.556291	0.125828
brief_43	0.187086	0.289229	1.27433	0.618248	0.675497	0.0496689
brief_44	0.331126	0.340448	0.53798	-0.774601	0.456954	0.119205
brief_45	0.299669	0.355918	0.754236	-0.697818	0.533113	0.13245
brief_46	0.288079	0.34312	0.774675	-0.579893	0.536424	0.112583
brief_47	0.293046	0.344946	0.753065	-0.617734	0.529801	0.115894
brief_48	0.516556	0.272903	0.022135	0.352833	0.13245	0.165563
brief_49	0.386589	0.345489	0.327226	-0.90413	0.377483	0.149007
brief_50	0.285596	0.319259	0.662239	-0.56716	0.509934	0.0794702
brief_51	0.241722	0.332884	1.04173	-0.119602	0.612583	0.0960265
brief_52	0.297185	0.338013	0.696638	-0.63761	0.513245	0.10596
brief_53	0.458609	0.387653	0.143558	-1.3191	0.344371	0.261589
brief_54	0.18543	0.274109	1.12999	0.271034	0.662252	0.0331126
brief_55	0.279801	0.367296	0.901552	-0.598368	0.586093	0.145695
brief_56	0.357616	0.394638	0.54933	-1.18566	0.493377	0.208609
brief_57	0.213576	0.350483	1.33275	0.304624	0.695364	0.122517
brief_58	0.337748	0.321178	0.417192	-0.703251	0.42053	0.0960265
brief_59	0.480132	0.301606	0.016294	-0.252428	0.201987	0.162252
brief_60	0.339404	0.35042	0.536198	-0.851074	0.456954	0.135762
brief_61	0.352649	0.363139	0.513376	-0.96751	0.453642	0.15894
brief_62	0.275662	0.363919	0.915139	-0.558865	0.589404	0.139073
brief_63	0.238411	0.317457	0.984135	-0.117986	0.599338	0.0761589
brief_64	0.163907	0.294674	1.61831	1.51962	0.735099	0.0629139
brief_65	0.25	0.330483	0.968042	-0.225332	0.592715	0.0927152
brief_66	0.221854	0.305736	1.04522	0.0496115	0.619205	0.0629139
brief_67	0.347682	0.35528	0.514135	-0.903695	0.450331	0.145695
brief_68	0.283113	0.333828	0.763181	-0.529764	0.533113	0.0993377
brief_69	0.290563	0.33144	0.7029	-0.589782	0.516556	0.0960265
brief_70	0.173841	0.291766	1.4638	1.10231	0.708609	0.0562914
brief_71	0.238411	0.320062	1.00012	-0.105784	0.602649	0.0794702
brief_72	0.263245	0.314764	0.780498	-0.407099	0.546358	0.0728477
brief_73	0.288079	0.340691	0.764614	-0.57439	0.533113	0.109272
brief_74	0.193709	0.299046	1.28007	0.586994	0.672185	0.0596026
brief_75	0.245033	0.306992	0.857352	-0.275012	0.572848	0.0629139
bsi_1	0.270281	0.29558	0.784372	-0.481962	0.437086	0.0364238
bsi_2	0.100993	0.195578	2.00929	3.43928	0.741722	0.00331126
bsi_3	0.0413907	0.163804	4.52745	20.8768	0.92053	0.0165563
bsi_4	0.0902318	0.18293	2.34907	5.78804	0.751656	0.00662252
bsi_5	0.330298	0.302723	0.598788	-0.737499	0.307947	0.0496689
bsi_6	0.288907	0.287179	0.874144	-0.0205893	0.347682	0.0529801
bsi_7	0.0745033	0.195824	2.84692	7.60989	0.84106	0.00993377
bsi_8	0.0765728	0.17614	2.54902	6.32281	0.801325	0.00331126
bsi_10	0.163079	0.270349	1.71202	2.04848	0.649007	0.0397351
bsi_11	0.154801	0.26598	1.72609	2.04397	0.675497	0.0331126
bsi_12	0.0968543	0.217187	2.43446	5.39999	0.788079	0.0165563
bsi_13	0.0732616	0.193228	3.10046	9.71234	0.831126	0.0165563
bsi_14	0.236755	0.305899	1.15426	0.188507	0.509934	0.0562914
bsi_15	0.306291	0.334291	0.799993	-0.588386	0.417219	0.0960265
bsi_16	0.28394	0.330148	0.959718	-0.333201	0.437086	0.089404
bsi_17	0.26904	0.32946	1.01661	-0.229467	0.476821	0.0860927
bsi_18	0.221026	0.318467	1.26701	0.351383	0.586093	0.0728477
bsi_19	0.164735	0.26934	1.6132	1.59508	0.649007	0.0298013
bsi_20	0.187914	0.279369	1.39606	0.901981	0.602649	0.0331126
bsi_21	0.198675	0.279702	1.3887	1.05745	0.562914	0.0430464
bsi_22	0.226821	0.308687	1.12718	-0.0115799	0.559603	0.0463576
bsi_23	0.155629	0.258761	1.71413	2.13396	0.655629	0.0298013
bsi_24	0.120861	0.222731	1.84287	2.51444	0.718543	0.00662252
bsi_25	0.289735	0.337899	0.879207	-0.538068	0.456954	0.0927152
bsi_26	0.278146	0.318867	0.910841	-0.352444	0.443709	0.0695364
bsi_27	0.301325	0.317267	0.769419	-0.543005	0.397351	0.0695364
bsi_28	0.0604305	0.164836	2.99639	8.88172	0.854305	0.00331126
bsi_29	0.0745033	0.188255	2.9745	9.09638	0.821192	0.013245
bsi_30	0.0918874	0.20465	2.41355	5.35997	0.788079	0.00993377
bsi_31	0.105132	0.219053	2.26191	4.65877	0.761589	0.0165563
bsi_32	0.235099	0.308526	1.19294	0.31665	0.519868	0.0662252
bsi_33	0.116722	0.227231	2.09271	3.7918	0.731788	0.0165563
bsi_34	0.0819536	0.203808	2.70171	6.84713	0.824503	0.013245
bsi_35	0.222682	0.312693	1.19303	0.15014	0.576159	0.0562914
bsi_36	0.343543	0.329293	0.638885	-0.770944	0.331126	0.0960265
bsi_37	0.120033	0.242359	2.14904	3.87181	0.745033	0.0264901
bsi_38	0.249172	0.304485	1.07419	0.132443	0.483444	0.0629139
bsi_41	0.0728477	0.193251	3.00829	8.89969	0.837748	0.013245
bsi_42	0.259106	0.297449	0.885492	-0.319609	0.460265	0.0397351
bsi_43	0.154801	0.272153	1.64294	1.56551	0.701987	0.0298013
bsi_44	0.161838	0.27725	1.72256	1.95212	0.668874	0.0430464
bsi_45	0.0968543	0.230183	2.54572	5.77619	0.807947	0.0264901
bsi_46	0.0960265	0.218983	2.48082	5.54072	0.791391	0.0165563
bsi_47	0.089404	0.199083	2.40959	5.49333	0.791391	0.00993377
bsi_48	0.126656	0.236332	2.03718	3.60307	0.708609	0.0231788
bsi_49	0.158113	0.25522	1.61906	1.77935	0.645695	0.0231788
bsi_50	0.209023	0.326258	1.2929	0.218266	0.645695	0.0662252
bsi_51	0.216887	0.317735	1.32539	0.4839	0.586093	0.0728477
bsi_52	0.22144	0.312997	1.26377	0.380483	0.569536	0.0662252
bsi_53	0.234272	0.346825	1.21665	0.0146735	0.609272	0.10596
panas_1	0.573262	0.259502	-0.483788	-0.31446	0.0662252	0.089404
panas_2	0.146109	0.23373	1.67794	2.18912	0.639073	0.013245
panas_3	0.617964	0.25166	-0.441605	-0.269538	0.0364238	0.139073
panas_4	0.175083	0.234631	1.26341	1.01263	0.559603	0.013245
panas_5	0.36548	0.291709	0.489553	-0.671614	0.228477	0.0562914
panas_6	0.285182	0.294351	0.622592	-0.75128	0.417219	0.0298013
panas_7	0.204884	0.231641	1.12555	0.93662	0.44702	0.013245
panas_8	0.531043	0.301778	-0.149155	-0.874975	0.112583	0.139073
panas_9	0.111755	0.203608	1.8898	3.08585	0.715232	0.00662252
panas_10	0.499586	0.291508	-0.047947	-0.834592	0.115894	0.102649
panas_11	0.29346	0.280944	0.742254	-0.252106	0.34106	0.0397351
panas_12	0.469785	0.287054	0.0121895	-0.750741	0.139073	0.0827815
panas_13	0.504553	0.321292	-0.166241	-0.976796	0.182119	0.135762
panas_14	0.35803	0.314007	0.366818	-0.961603	0.324503	0.0629139
panas_15	0.189983	0.295609	1.5633	1.39301	0.609272	0.0629139
panas_16	0.295944	0.309072	0.855676	-0.331203	0.374172	0.0662252
panas_17	0.584851	0.262345	-0.279854	-0.523635	0.0463576	0.129139
panas_18	0.199917	0.280206	1.38274	0.984242	0.556291	0.0397351
panas_19	0.548427	0.285633	-0.0499912	-0.823707	0.0662252	0.149007
panas_20	0.302566	0.300504	0.743906	-0.380438	0.364238	0.0596026
panas_21	0.142798	0.249468	1.84789	2.70023	0.678808	0.0264901
panas_22	0.58154	0.276473	-0.4344	-0.521825	0.0728477	0.125828
panas_23	0.173013	0.241062	1.28473	0.803868	0.57947	0.00993377
panas_24	0.267798	0.319208	1.02067	-0.127656	0.456954	0.0761589
panas_25	0.532699	0.287504	-0.139489	-0.622681	0.102649	0.13245
panas_26	0.251242	0.277268	0.960757	0.0781338	0.423841	0.0331126
panas_27	0.189983	0.254872	1.30919	0.962543	0.543046	0.0198675
panas_28	0.332368	0.302079	0.471954	-0.84281	0.334437	0.0463576
panas_29	0.236341	0.285062	1.13485	0.443959	0.470199	0.0463576
panas_30	0.182533	0.263843	1.40908	1.14122	0.586093	0.0264901
panas_31	0.561672	0.297369	-0.189	-0.865696	0.0827815	0.165563
panas_32	0.179222	0.25819	1.42564	1.23727	0.582781	0.0231788
panas_33	0.495447	0.298859	-0.176038	-0.900003	0.149007	0.089404
panas_34	0.329056	0.30705	0.66652	-0.582617	0.31457	0.0662252
panas_35	0.250414	0.306101	1.00097	-0.125137	0.493377	0.0529801
panas_36	0.493791	0.289655	0.150271	-0.777474	0.0960265	0.122517
panas_37	0.496275	0.273855	-0.00184411	-0.609667	0.0960265	0.089404
panas_38	0.0749172	0.168742	2.55633	6.72574	0.794702	0.00331126
panas_39	0.422599	0.316786	0.281293	-0.967134	0.208609	0.102649
panas_40	0.197434	0.266444	1.23934	0.560024	0.549669	0.0198675
panas_41	0.433361	0.290989	0.175036	-0.766021	0.168874	0.0761589
panas_42	0.140315	0.249633	1.83135	2.52833	0.692053	0.0231788
panas_43	0.482202	0.306599	-0.0596722	-0.950561	0.162252	0.102649
panas_44	0.151904	0.247811	1.7349	2.50227	0.649007	0.0298013
panas_45	0.337334	0.302054	0.486805	-0.772082	0.321192	0.0529801
panas_46	0.233858	0.317012	1.21136	0.258734	0.539735	0.0728477
panas_47	0.507864	0.289256	-0.100786	-0.79303	0.112583	0.102649
panas_48	0.214818	0.296109	1.27471	0.507685	0.549669	0.0463576
panas_49	0.109685	0.197638	1.88938	3.06176	0.708609	0.00331126
panas_50	0.257036	0.297069	0.996607	0.0252329	0.450331	0.0529801
panas_51	0.169288	0.278587	1.60298	1.48725	0.652318	0.0364238
panas_52	0.605132	0.291452	-0.424915	-0.641621	0.0728477	0.188742
panas_53	0.128725	0.245889	2.08312	3.67107	0.715232	0.0298013
panas_54	0.189983	0.262101	1.29323	0.889383	0.569536	0.0264901
panas_55	0.598924	0.272632	-0.463201	-0.258792	0.0728477	0.152318
panas_56	0.114238	0.222509	2.09831	3.94073	0.735099	0.0165563
panas_57	0.521109	0.299188	-0.105344	-0.872967	0.112583	0.129139
panas_58	0.467301	0.284965	0.067984	-0.654906	0.135762	0.089404
panas_59	0.551738	0.289387	-0.293841	-0.628685	0.102649	0.13245
panas_60	0.249586	0.327406	1.1081	-0.0401985	0.52649	0.0827815

## Sheet: Supplementary Table 4
network	included_nodes
medial frontal	10, 12, 16, 52, 53, 54, 56, 57, 64, 65, 137, 140, 145, 148, 149, 150, 151, 153, 156, 162, 165, 183, 185, 186, 187, 190, 192, 194, 219
frontoparietal	1, 4, 7, 8, 9, 14, 17, 19, 21, 22, 30, 31, 47, 48, 55, 70, 111, 112, 116, 139, 142, 143, 147, 154, 157, 164, 182, 184, 193, 196, 199, 242, 246, 247
default mode	3, 5, 6, 13, 49, 50, 85, 86, 90, 96, 115, 134, 138, 141, 203, 222, 223, 225, 227, 239
motor cortex	23, 24, 25, 26, 27, 33, 34, 35, 37, 38, 39, 40, 45, 46, 51, 58, 60, 61, 62, 63, 84, 89, 92, 97, 109, 158, 159, 160, 161, 163, 166, 167, 168, 170, 171, 172, 173, 174, 179, 180, 181, 188, 189, 191, 195, 197, 202, 218, 228, 235
visual A	42, 68, 72, 75, 77, 79, 80, 82, 87, 98, 176, 198, 205, 207, 208, 211, 215, 216
visual B	76, 78, 81, 100, 102, 212, 213, 214, 241
visual association	41, 43, 59, 66, 67, 69, 71, 73, 74, 175, 177, 200, 201, 204, 206, 209, 210, 240
salience	2, 11, 15, 18, 20, 28, 29, 32, 36, 44, 83, 88, 91, 110, 119, 135, 136, 144, 146, 152, 155, 169, 178, 220, 221, 224, 226, 244, 245, 251
subcortical	93, 94, 95, 99, 120, 121, 122, 123, 124, 125, 126, 127, 128, 217, 229, 230, 231, 232, 233, 234, 257, 258, 259, 260, 261, 262, 263, 264, 265
cerebellum	101, 103, 104, 105, 106, 107, 108, 113, 114, 117, 118, 129, 130, 131, 132, 133, 236, 237, 238, 243, 248, 249, 250, 252, 253, 254, 255, 256, 266, 267, 268
VisCent	17, 27, 67, 73, 74, 76, 78, 81, 100, 102, 104, 105, 107, 108, 109, 110, 111, 112, 113, 114, 115, 116, 117, 118, 120, 121, 122, 127, 128, 129, 131, 132, 133, 162, 184, 188, 204, 206, 207, 210, 212, 213, 214, 217, 220, 229, 236, 237, 238, 239, 240, 241, 242, 243, 246, 247, 249, 250, 252, 253, 254, 255, 256, 257, 258, 260, 262, 263, 265, 266, 267
VisPeri	68, 72, 75, 77, 79, 80, 82, 87, 98, 101, 106, 126, 205, 208, 211, 215, 216, 244, 248
SomMotA	24, 25, 26, 33, 39, 89, 160, 167, 172, 174, 218
SomMotB	23, 37, 40, 61, 62, 158, 159, 163, 173, 180
DorsAttnA	43, 49, 50, 66, 69, 71, 93, 119, 178, 200, 201, 203, 209
DorsAttnB	32, 38, 41, 44, 45, 165, 166, 171, 175, 179
SalVentAttnA	28, 29, 34, 35, 46, 84, 91, 124, 161, 168, 169, 170, 181, 221, 226, 261
SalVentAttnB	9, 11, 15, 20, 36, 144, 146, 150, 155, 219
LimbicB	51, 52, 57, 58, 59, 60, 92, 94, 96, 97, 99, 185, 186, 189, 194, 195, 196, 202, 228, 232, 234, 235, 268
LimbicA	1, 2, 3, 4, 18, 123, 125, 134, 135, 136, 137, 139, 152, 259
ContA	42, 88, 176, 264
ContB	19, 21, 22, 30, 31, 70, 147, 154, 157, 164, 177, 199
ContC	7, 8, 14, 47, 55, 142, 143
DefaultA	54, 63, 65, 191, 192
DefaultB	86, 95, 103, 130, 198, 230, 231, 233, 245, 251
DefaultC	5, 6, 13, 48, 64, 83, 85, 90, 138, 140, 141, 182, 222, 223, 224, 225, 227
TempPar	10, 12, 16, 53, 56, 145, 148, 149, 151, 153, 156, 183, 187, 190, 193, 197

## Sheet: Supplementary Table 5
network	item	group	pred_power
Whole Brain	atq_1	Experimental	0.120908
Whole Brain	atq_1	Null	0.0327707
Whole Brain	atq_10	Experimental	0.104163
Whole Brain	atq_10	Null	0.0339037
Whole Brain	atq_11	Experimental	0.0723965
Whole Brain	atq_11	Null	0.0344522
Whole Brain	atq_12	Experimental	0.110118
Whole Brain	atq_12	Null	0.0270845
Whole Brain	atq_13	Experimental	0.0048803
Whole Brain	atq_13	Null	0.0274697
Whole Brain	atq_14	Experimental	0.000614399
Whole Brain	atq_14	Null	0.0344657
Whole Brain	atq_15	Experimental	0.0720384
Whole Brain	atq_15	Null	0.0374885
Whole Brain	atq_16	Experimental	0.114914
Whole Brain	atq_16	Null	0.0287631
Whole Brain	atq_17	Experimental	0.0731667
Whole Brain	atq_17	Null	0.026058
Whole Brain	atq_18	Experimental	0.0505535
Whole Brain	atq_18	Null	0.0345854
Whole Brain	atq_19	Experimental	0.116699
Whole Brain	atq_19	Null	0.0298365
Whole Brain	atq_2	Experimental	0.0774532
Whole Brain	atq_2	Null	0.020713
Whole Brain	atq_20	Experimental	0.152647
Whole Brain	atq_20	Null	0.0353824
Whole Brain	atq_21	Experimental	0.0263593
Whole Brain	atq_21	Null	0.0316185
Whole Brain	atq_22	Experimental	0.0241237
Whole Brain	atq_22	Null	0.028007
Whole Brain	atq_23	Experimental	0.065878
Whole Brain	atq_23	Null	0.0298172
Whole Brain	atq_24	Experimental	0.0605394
Whole Brain	atq_24	Null	0.0355782
Whole Brain	atq_25	Experimental	0.144177
Whole Brain	atq_25	Null	0.0269924
Whole Brain	atq_26	Experimental	0.0156797
Whole Brain	atq_26	Null	0.0273405
Whole Brain	atq_27	Experimental	0.0495603
Whole Brain	atq_27	Null	0.0259817
Whole Brain	atq_28	Experimental	0.126852
Whole Brain	atq_28	Null	0.03269
Whole Brain	atq_29	Experimental	0.106469
Whole Brain	atq_29	Null	0.0267328
Whole Brain	atq_3	Experimental	3.0493e-05
Whole Brain	atq_3	Null	0.0372321
Whole Brain	atq_30	Experimental	0.146494
Whole Brain	atq_30	Null	0.0337135
Whole Brain	atq_31	Experimental	0.0932357
Whole Brain	atq_31	Null	0.0359888
Whole Brain	atq_32	Experimental	0.135151
Whole Brain	atq_32	Null	0.0324152
Whole Brain	atq_33	Experimental	0.0786233
Whole Brain	atq_33	Null	0.0260883
Whole Brain	atq_34	Experimental	0
Whole Brain	atq_34	Null	0.0257315
Whole Brain	atq_35	Experimental	0.0267357
Whole Brain	atq_35	Null	0.022107
Whole Brain	atq_36	Experimental	0.040458
Whole Brain	atq_36	Null	0.0253162
Whole Brain	atq_37	Experimental	0.0079642
Whole Brain	atq_37	Null	0.0222549
Whole Brain	atq_38	Experimental	0.0293849
Whole Brain	atq_38	Null	0.0492786
Whole Brain	atq_39	Experimental	0.0764419
Whole Brain	atq_39	Null	0.0290448
Whole Brain	atq_4	Experimental	0.0190621
Whole Brain	atq_4	Null	0.0244427
Whole Brain	atq_40	Experimental	0.1213
Whole Brain	atq_40	Null	0.0290411
Whole Brain	atq_41	Experimental	0.122177
Whole Brain	atq_41	Null	0.0381113
Whole Brain	atq_42	Experimental	0.0396721
Whole Brain	atq_42	Null	0.0343531
Whole Brain	atq_43	Experimental	0.0621118
Whole Brain	atq_43	Null	0.0361059
Whole Brain	atq_44	Experimental	0.133797
Whole Brain	atq_44	Null	0.0272647
Whole Brain	atq_45	Experimental	0.186955
Whole Brain	atq_45	Null	0.0330674
Whole Brain	atq_46	Experimental	0.0842685
Whole Brain	atq_46	Null	0.0348063
Whole Brain	atq_47	Experimental	0.0985174
Whole Brain	atq_47	Null	0.0357449
Whole Brain	atq_48	Experimental	0.176472
Whole Brain	atq_48	Null	0.0246959
Whole Brain	atq_49	Experimental	0.00407115
Whole Brain	atq_49	Null	0.0339026
Whole Brain	atq_5	Experimental	0.0369229
Whole Brain	atq_5	Null	0.0254201
Whole Brain	atq_50	Experimental	0.0780407
Whole Brain	atq_50	Null	0.03296
Whole Brain	atq_51	Experimental	0.14508
Whole Brain	atq_51	Null	0.0236772
Whole Brain	atq_52	Experimental	0.124811
Whole Brain	atq_52	Null	0.0322385
Whole Brain	atq_53	Experimental	0.00266122
Whole Brain	atq_53	Null	0.0319833
Whole Brain	atq_54	Experimental	0.155287
Whole Brain	atq_54	Null	0.0262406
Whole Brain	atq_55	Experimental	0.0486789
Whole Brain	atq_55	Null	0.027228
Whole Brain	atq_56	Experimental	0.185612
Whole Brain	atq_56	Null	0.0293454
Whole Brain	atq_57	Experimental	0.176185
Whole Brain	atq_57	Null	0.028201
Whole Brain	atq_58	Experimental	0.0483581
Whole Brain	atq_58	Null	0.0246765
Whole Brain	atq_59	Experimental	0.182816
Whole Brain	atq_59	Null	0.0423435
Whole Brain	atq_6	Experimental	0.00695516
Whole Brain	atq_6	Null	0.0350994
Whole Brain	atq_60	Experimental	0.0327174
Whole Brain	atq_60	Null	0.0318112
Whole Brain	atq_61	Experimental	0.0779065
Whole Brain	atq_61	Null	0.0317499
Whole Brain	atq_62	Experimental	0.00993862
Whole Brain	atq_62	Null	0.0295083
Whole Brain	atq_63	Experimental	0.000227719
Whole Brain	atq_63	Null	0.030812
Whole Brain	atq_64	Experimental	0.0901907
Whole Brain	atq_64	Null	0.0305849
Whole Brain	atq_65	Experimental	0.110511
Whole Brain	atq_65	Null	0.0253869
Whole Brain	atq_66	Experimental	0.0508052
Whole Brain	atq_66	Null	0.0295473
Whole Brain	atq_67	Experimental	0.174786
Whole Brain	atq_67	Null	0.0337282
Whole Brain	atq_68	Experimental	0.0477008
Whole Brain	atq_68	Null	0.0336872
Whole Brain	atq_69	Experimental	0.000392542
Whole Brain	atq_69	Null	0.0329415
Whole Brain	atq_7	Experimental	0.146329
Whole Brain	atq_7	Null	0.0389394
Whole Brain	atq_70	Experimental	0.15018
Whole Brain	atq_70	Null	0.0366251
Whole Brain	atq_71	Experimental	0.13162
Whole Brain	atq_71	Null	0.0272255
Whole Brain	atq_72	Experimental	0.0642941
Whole Brain	atq_72	Null	0.0271045
Whole Brain	atq_73	Experimental	0.121448
Whole Brain	atq_73	Null	0.0296141
Whole Brain	atq_74	Experimental	0
Whole Brain	atq_74	Null	0.0291243
Whole Brain	atq_75	Experimental	0.0538726
Whole Brain	atq_75	Null	0.0267573
Whole Brain	atq_76	Experimental	0.230559
Whole Brain	atq_76	Null	0.0361141
Whole Brain	atq_77	Experimental	0.0690021
Whole Brain	atq_77	Null	0.0347522
Whole Brain	atq_8	Experimental	0.0090736
Whole Brain	atq_8	Null	0.0275213
Whole Brain	atq_9	Experimental	0.0909075
Whole Brain	atq_9	Null	0.0317834
Whole Brain	brief_1	Experimental	0.149936
Whole Brain	brief_1	Null	0.0267416
Whole Brain	brief_10	Experimental	0.108586
Whole Brain	brief_10	Null	0.0316443
Whole Brain	brief_11	Experimental	0.0936484
Whole Brain	brief_11	Null	0.0308668
Whole Brain	brief_12	Experimental	0.232555
Whole Brain	brief_12	Null	0.0294875
Whole Brain	brief_13	Experimental	0
Whole Brain	brief_13	Null	0.0301394
Whole Brain	brief_14	Experimental	0.192499
Whole Brain	brief_14	Null	0.0337822
Whole Brain	brief_15	Experimental	0.0294739
Whole Brain	brief_15	Null	0.0275211
Whole Brain	brief_16	Experimental	0.0750973
Whole Brain	brief_16	Null	0.0316551
Whole Brain	brief_17	Experimental	0.0967609
Whole Brain	brief_17	Null	0.0351456
Whole Brain	brief_18	Experimental	0.0119882
Whole Brain	brief_18	Null	0.0272013
Whole Brain	brief_19	Experimental	0.190029
Whole Brain	brief_19	Null	0.0345726
Whole Brain	brief_2	Experimental	0
Whole Brain	brief_2	Null	0.0280547
Whole Brain	brief_20	Experimental	0.208455
Whole Brain	brief_20	Null	0.0232723
Whole Brain	brief_21	Experimental	0
Whole Brain	brief_21	Null	0.0358252
Whole Brain	brief_22	Experimental	0.000738355
Whole Brain	brief_22	Null	0.0346975
Whole Brain	brief_23	Experimental	0.00294148
Whole Brain	brief_23	Null	0.0250573
Whole Brain	brief_24	Experimental	0.0523754
Whole Brain	brief_24	Null	0.0267385
Whole Brain	brief_25	Experimental	0.0141041
Whole Brain	brief_25	Null	0.0257645
Whole Brain	brief_26	Experimental	0.0173986
Whole Brain	brief_26	Null	0.0322804
Whole Brain	brief_27	Experimental	0.0890994
Whole Brain	brief_27	Null	0.030355
Whole Brain	brief_28	Experimental	0.205344
Whole Brain	brief_28	Null	0.0346201
Whole Brain	brief_29	Experimental	0.0635956
Whole Brain	brief_29	Null	0.033587
Whole Brain	brief_3	Experimental	0.00137504
Whole Brain	brief_3	Null	0.0270665
Whole Brain	brief_30	Experimental	0.0264968
Whole Brain	brief_30	Null	0.0308905
Whole Brain	brief_31	Experimental	0.0624949
Whole Brain	brief_31	Null	0.0372385
Whole Brain	brief_32	Experimental	0.00104716
Whole Brain	brief_32	Null	0.0216954
Whole Brain	brief_33	Experimental	0.176788
Whole Brain	brief_33	Null	0.0289693
Whole Brain	brief_34	Experimental	0.00671617
Whole Brain	brief_34	Null	0.0358736
Whole Brain	brief_35	Experimental	0.0507131
Whole Brain	brief_35	Null	0.0344511
Whole Brain	brief_36	Experimental	0.00542529
Whole Brain	brief_36	Null	0.0343838
Whole Brain	brief_37	Experimental	0.00393537
Whole Brain	brief_37	Null	0.0358933
Whole Brain	brief_38	Experimental	0.0895043
Whole Brain	brief_38	Null	0.0227166
Whole Brain	brief_39	Experimental	0
Whole Brain	brief_39	Null	0.0287651
Whole Brain	brief_4	Experimental	0.103428
Whole Brain	brief_4	Null	0.0313687
Whole Brain	brief_40	Experimental	0.00309854
Whole Brain	brief_40	Null	0.0269826
Whole Brain	brief_41	Experimental	0
Whole Brain	brief_41	Null	0.0302472
Whole Brain	brief_42	Experimental	0.22036
Whole Brain	brief_42	Null	0.0328599
Whole Brain	brief_43	Experimental	0.10534
Whole Brain	brief_43	Null	0.0261831
Whole Brain	brief_44	Experimental	0.0425072
Whole Brain	brief_44	Null	0.0314886
Whole Brain	brief_45	Experimental	0.0757383
Whole Brain	brief_45	Null	0.031132
Whole Brain	brief_46	Experimental	0.121104
Whole Brain	brief_46	Null	0.0305455
Whole Brain	brief_47	Experimental	0.110903
Whole Brain	brief_47	Null	0.0298971
Whole Brain	brief_48	Experimental	0.0810815
Whole Brain	brief_48	Null	0.0300858
Whole Brain	brief_49	Experimental	0.131345
Whole Brain	brief_49	Null	0.0374176
Whole Brain	brief_5	Experimental	0.18793
Whole Brain	brief_5	Null	0.0341162
Whole Brain	brief_50	Experimental	0.0541816
Whole Brain	brief_50	Null	0.0365443
Whole Brain	brief_51	Experimental	0.0318889
Whole Brain	brief_51	Null	0.0180281
Whole Brain	brief_52	Experimental	0.166383
Whole Brain	brief_52	Null	0.0316193
Whole Brain	brief_53	Experimental	0.0575042
Whole Brain	brief_53	Null	0.0383019
Whole Brain	brief_54	Experimental	0.013509
Whole Brain	brief_54	Null	0.0303287
Whole Brain	brief_55	Experimental	0.109251
Whole Brain	brief_55	Null	0.0273966
Whole Brain	brief_56	Experimental	0.0565739
Whole Brain	brief_56	Null	0.0305488
Whole Brain	brief_57	Experimental	0.16367
Whole Brain	brief_57	Null	0.0376476
Whole Brain	brief_58	Experimental	0
Whole Brain	brief_58	Null	0.0288872
Whole Brain	brief_59	Experimental	0.105218
Whole Brain	brief_59	Null	0.0327086
Whole Brain	brief_6	Experimental	0.122539
Whole Brain	brief_6	Null	0.034756
Whole Brain	brief_60	Experimental	0.0399601
Whole Brain	brief_60	Null	0.0345638
Whole Brain	brief_61	Experimental	0.0434945
Whole Brain	brief_61	Null	0.0343026
Whole Brain	brief_62	Experimental	0.0913566
Whole Brain	brief_62	Null	0.0313622
Whole Brain	brief_63	Experimental	0.000137048
Whole Brain	brief_63	Null	0.035885
Whole Brain	brief_64	Experimental	0.122062
Whole Brain	brief_64	Null	0.0267345
Whole Brain	brief_65	Experimental	0.119904
Whole Brain	brief_65	Null	0.0334551
Whole Brain	brief_66	Experimental	0.0378149
Whole Brain	brief_66	Null	0.045739
Whole Brain	brief_67	Experimental	0.203493
Whole Brain	brief_67	Null	0.0222362
Whole Brain	brief_68	Experimental	0.0190951
Whole Brain	brief_68	Null	0.0299608
Whole Brain	brief_69	Experimental	0.163522
Whole Brain	brief_69	Null	0.0300936
Whole Brain	brief_7	Experimental	0.186754
Whole Brain	brief_7	Null	0.0299604
Whole Brain	brief_70	Experimental	0.00177202
Whole Brain	brief_70	Null	0.0371402
Whole Brain	brief_71	Experimental	0.0407024
Whole Brain	brief_71	Null	0.0239036
Whole Brain	brief_72	Experimental	0.172325
Whole Brain	brief_72	Null	0.0223203
Whole Brain	brief_73	Experimental	0.131215
Whole Brain	brief_73	Null	0.035029
Whole Brain	brief_74	Experimental	0.0865507
Whole Brain	brief_74	Null	0.0325411
Whole Brain	brief_75	Experimental	0.0514105
Whole Brain	brief_75	Null	0.0253365
Whole Brain	brief_8	Experimental	0.0597403
Whole Brain	brief_8	Null	0.030971
Whole Brain	brief_9	Experimental	0.00789681
Whole Brain	brief_9	Null	0.0324608
Whole Brain	bsi_1	Experimental	0.165399
Whole Brain	bsi_1	Null	0.0266325
Whole Brain	bsi_10	Experimental	0.0906367
Whole Brain	bsi_10	Null	0.0248651
Whole Brain	bsi_11	Experimental	0.0812853
Whole Brain	bsi_11	Null	0.0279947
Whole Brain	bsi_12	Experimental	0.092824
Whole Brain	bsi_12	Null	0.0292465
Whole Brain	bsi_13	Experimental	0.102594
Whole Brain	bsi_13	Null	0.0295871
Whole Brain	bsi_14	Experimental	0.130057
Whole Brain	bsi_14	Null	0.0308992
Whole Brain	bsi_15	Experimental	0.0728719
Whole Brain	bsi_15	Null	0.0336314
Whole Brain	bsi_16	Experimental	0.136163
Whole Brain	bsi_16	Null	0.0357711
Whole Brain	bsi_17	Experimental	0.129727
Whole Brain	bsi_17	Null	0.0257969
Whole Brain	bsi_18	Experimental	0.218911
Whole Brain	bsi_18	Null	0.0262759
Whole Brain	bsi_19	Experimental	0.110046
Whole Brain	bsi_19	Null	0.0364303
Whole Brain	bsi_2	Experimental	0.111937
Whole Brain	bsi_2	Null	0.0287025
Whole Brain	bsi_20	Experimental	0.195728
Whole Brain	bsi_20	Null	0.0283438
Whole Brain	bsi_21	Experimental	0.0732413
Whole Brain	bsi_21	Null	0.0365934
Whole Brain	bsi_22	Experimental	0.115765
Whole Brain	bsi_22	Null	0.0309631
Whole Brain	bsi_23	Experimental	0.0246108
Whole Brain	bsi_23	Null	0.0289548
Whole Brain	bsi_24	Experimental	0.135175
Whole Brain	bsi_24	Null	0.033497
Whole Brain	bsi_25	Experimental	0.177762
Whole Brain	bsi_25	Null	0.0275711
Whole Brain	bsi_26	Experimental	0.0640719
Whole Brain	bsi_26	Null	0.0348019
Whole Brain	bsi_27	Experimental	0.0118366
Whole Brain	bsi_27	Null	0.0345571
Whole Brain	bsi_28	Experimental	0.139186
Whole Brain	bsi_28	Null	0.0383766
Whole Brain	bsi_29	Experimental	0.14238
Whole Brain	bsi_29	Null	0.0305982
Whole Brain	bsi_3	Experimental	0.145325
Whole Brain	bsi_3	Null	0.0306373
Whole Brain	bsi_30	Experimental	0.108254
Whole Brain	bsi_30	Null	0.0284401
Whole Brain	bsi_31	Experimental	0.28713
Whole Brain	bsi_31	Null	0.028926
Whole Brain	bsi_32	Experimental	0.117284
Whole Brain	bsi_32	Null	0.0310327
Whole Brain	bsi_33	Experimental	0.0250338
Whole Brain	bsi_33	Null	0.0212628
Whole Brain	bsi_34	Experimental	0.192046
Whole Brain	bsi_34	Null	0.0311338
Whole Brain	bsi_35	Experimental	0.204999
Whole Brain	bsi_35	Null	0.0338684
Whole Brain	bsi_36	Experimental	0.0185447
Whole Brain	bsi_36	Null	0.030124
Whole Brain	bsi_37	Experimental	0.0533587
Whole Brain	bsi_37	Null	0.0299418
Whole Brain	bsi_38	Experimental	0.103656
Whole Brain	bsi_38	Null	0.0317861
Whole Brain	bsi_4	Experimental	0.00224984
Whole Brain	bsi_4	Null	0.0333206
Whole Brain	bsi_41	Experimental	0.0507534
Whole Brain	bsi_41	Null	0.028423
Whole Brain	bsi_42	Experimental	0.0929992
Whole Brain	bsi_42	Null	0.0375677
Whole Brain	bsi_43	Experimental	0.148021
Whole Brain	bsi_43	Null	0.0375587
Whole Brain	bsi_44	Experimental	0.0926235
Whole Brain	bsi_44	Null	0.0386267
Whole Brain	bsi_45	Experimental	0.172834
Whole Brain	bsi_45	Null	0.0297247
Whole Brain	bsi_46	Experimental	0.0619207
Whole Brain	bsi_46	Null	0.0261875
Whole Brain	bsi_47	Experimental	0.123249
Whole Brain	bsi_47	Null	0.0366804
Whole Brain	bsi_48	Experimental	0.0823187
Whole Brain	bsi_48	Null	0.0376801
Whole Brain	bsi_49	Experimental	0.085601
Whole Brain	bsi_49	Null	0.0277464
Whole Brain	bsi_5	Experimental	0.0113221
Whole Brain	bsi_5	Null	0.032964
Whole Brain	bsi_50	Experimental	0.18903
Whole Brain	bsi_50	Null	0.0361806
Whole Brain	bsi_51	Experimental	0.124095
Whole Brain	bsi_51	Null	0.0342552
Whole Brain	bsi_52	Experimental	0.16799
Whole Brain	bsi_52	Null	0.0302619
Whole Brain	bsi_53	Experimental	0.143812
Whole Brain	bsi_53	Null	0.0351703
Whole Brain	bsi_6	Experimental	0.0456636
Whole Brain	bsi_6	Null	0.0321807
Whole Brain	bsi_7	Experimental	0.166562
Whole Brain	bsi_7	Null	0.0276525
Whole Brain	bsi_8	Experimental	0.0582452
Whole Brain	bsi_8	Null	0.0259665
Whole Brain	iri_1	Experimental	0.208129
Whole Brain	iri_1	Null	0.0289161
Whole Brain	iri_10	Experimental	0.166915
Whole Brain	iri_10	Null	0.0291606
Whole Brain	iri_11	Experimental	6.785e-05
Whole Brain	iri_11	Null	0.0318116
Whole Brain	iri_12	Experimental	0.0998534
Whole Brain	iri_12	Null	0.0274366
Whole Brain	iri_13	Experimental	0.0328829
Whole Brain	iri_13	Null	0.0304888
Whole Brain	iri_14	Experimental	0.0180609
Whole Brain	iri_14	Null	0.0292047
Whole Brain	iri_15	Experimental	0.038615
Whole Brain	iri_15	Null	0.0341693
Whole Brain	iri_16	Experimental	0.000955562
Whole Brain	iri_16	Null	0.0266627
Whole Brain	iri_17	Experimental	0.170594
Whole Brain	iri_17	Null	0.0428482
Whole Brain	iri_18	Experimental	0.0150399
Whole Brain	iri_18	Null	0.0300474
Whole Brain	iri_19	Experimental	0.149341
Whole Brain	iri_19	Null	0.0333648
Whole Brain	iri_2	Experimental	0
Whole Brain	iri_2	Null	0.0319979
Whole Brain	iri_20	Experimental	0.0787843
Whole Brain	iri_20	Null	0.0266616
Whole Brain	iri_21	Experimental	0.0273559
Whole Brain	iri_21	Null	0.041726
Whole Brain	iri_22	Experimental	0.0544939
Whole Brain	iri_22	Null	0.0403849
Whole Brain	iri_23	Experimental	0
Whole Brain	iri_23	Null	0.0303452
Whole Brain	iri_24	Experimental	0.105802
Whole Brain	iri_24	Null	0.0292324
Whole Brain	iri_25	Experimental	0.0590487
Whole Brain	iri_25	Null	0.032818
Whole Brain	iri_26	Experimental	0.112361
Whole Brain	iri_26	Null	0.0330621
Whole Brain	iri_27	Experimental	0.158539
Whole Brain	iri_27	Null	0.0348744
Whole Brain	iri_28	Experimental	0.0164377
Whole Brain	iri_28	Null	0.0312493
Whole Brain	iri_3	Experimental	0.000256484
Whole Brain	iri_3	Null	0.0289468
Whole Brain	iri_4	Experimental	0.0368995
Whole Brain	iri_4	Null	0.0287366
Whole Brain	iri_5	Experimental	0.176055
Whole Brain	iri_5	Null	0.0256186
Whole Brain	iri_6	Experimental	0.190171
Whole Brain	iri_6	Null	0.0307637
Whole Brain	iri_7	Experimental	0.0528877
Whole Brain	iri_7	Null	0.0290228
Whole Brain	iri_8	Experimental	0.00149898
Whole Brain	iri_8	Null	0.0394553
Whole Brain	iri_9	Experimental	0.0544827
Whole Brain	iri_9	Null	0.0360947
Whole Brain	panas_1	Experimental	0.134699
Whole Brain	panas_1	Null	0.0224529
Whole Brain	panas_10	Experimental	0.0926181
Whole Brain	panas_10	Null	0.0356704
Whole Brain	panas_11	Experimental	0.155241
Whole Brain	panas_11	Null	0.0346079
Whole Brain	panas_12	Experimental	0.018958
Whole Brain	panas_12	Null	0.0272017
Whole Brain	panas_13	Experimental	0.0579335
Whole Brain	panas_13	Null	0.0335626
Whole Brain	panas_14	Experimental	0.171759
Whole Brain	panas_14	Null	0.030138
Whole Brain	panas_15	Experimental	0.173086
Whole Brain	panas_15	Null	0.0314864
Whole Brain	panas_16	Experimental	0.115369
Whole Brain	panas_16	Null	0.0240597
Whole Brain	panas_17	Experimental	0.160618
Whole Brain	panas_17	Null	0.0241822
Whole Brain	panas_18	Experimental	0.0132668
Whole Brain	panas_18	Null	0.0312541
Whole Brain	panas_19	Experimental	0.0282058
Whole Brain	panas_19	Null	0.035083
Whole Brain	panas_2	Experimental	0.189617
Whole Brain	panas_2	Null	0.0367829
Whole Brain	panas_20	Experimental	0.079634
Whole Brain	panas_20	Null	0.0336278
Whole Brain	panas_21	Experimental	0.0535517
Whole Brain	panas_21	Null	0.0222009
Whole Brain	panas_22	Experimental	0.172407
Whole Brain	panas_22	Null	0.0284297
Whole Brain	panas_23	Experimental	0.0226741
Whole Brain	panas_23	Null	0.0301161
Whole Brain	panas_24	Experimental	0.0699143
Whole Brain	panas_24	Null	0.0327685
Whole Brain	panas_25	Experimental	0.0618126
Whole Brain	panas_25	Null	0.0206004
Whole Brain	panas_26	Experimental	0.0183887
Whole Brain	panas_26	Null	0.0339424
Whole Brain	panas_27	Experimental	0.08127
Whole Brain	panas_27	Null	0.0248525
Whole Brain	panas_28	Experimental	0.193419
Whole Brain	panas_28	Null	0.0347505
Whole Brain	panas_29	Experimental	0.0717253
Whole Brain	panas_29	Null	0.0217752
Whole Brain	panas_3	Experimental	9.12871e-06
Whole Brain	panas_3	Null	0.0273067
Whole Brain	panas_30	Experimental	0.0746072
Whole Brain	panas_30	Null	0.0313655
Whole Brain	panas_31	Experimental	0.18164
Whole Brain	panas_31	Null	0.0347419
Whole Brain	panas_32	Experimental	0.0346465
Whole Brain	panas_32	Null	0.0286593
Whole Brain	panas_33	Experimental	0.140973
Whole Brain	panas_33	Null	0.0240596
Whole Brain	panas_34	Experimental	5.20925e-05
Whole Brain	panas_34	Null	0.0308399
Whole Brain	panas_35	Experimental	0.043906
Whole Brain	panas_35	Null	0.0279464
Whole Brain	panas_36	Experimental	0.048826
Whole Brain	panas_36	Null	0.0219341
Whole Brain	panas_37	Experimental	0.199923
Whole Brain	panas_37	Null	0.0252441
Whole Brain	panas_38	Experimental	0.10106
Whole Brain	panas_38	Null	0.027232
Whole Brain	panas_39	Experimental	0.142347
Whole Brain	panas_39	Null	0.0255089
Whole Brain	panas_4	Experimental	0.0618657
Whole Brain	panas_4	Null	0.0329265
Whole Brain	panas_40	Experimental	0.0132619
Whole Brain	panas_40	Null	0.0250561
Whole Brain	panas_41	Experimental	0.124416
Whole Brain	panas_41	Null	0.0317914
Whole Brain	panas_42	Experimental	0.166152
Whole Brain	panas_42	Null	0.0354554
Whole Brain	panas_43	Experimental	0.0170442
Whole Brain	panas_43	Null	0.030754
Whole Brain	panas_44	Experimental	0.0387349
Whole Brain	panas_44	Null	0.0336589
Whole Brain	panas_45	Experimental	0.0733422
Whole Brain	panas_45	Null	0.0332742
Whole Brain	panas_46	Experimental	0.146109
Whole Brain	panas_46	Null	0.0258248
Whole Brain	panas_47	Experimental	0.0488179
Whole Brain	panas_47	Null	0.0273575
Whole Brain	panas_48	Experimental	0.0846972
Whole Brain	panas_48	Null	0.0333747
Whole Brain	panas_49	Experimental	0.00922028
Whole Brain	panas_49	Null	0.032081
Whole Brain	panas_5	Experimental	0.127183
Whole Brain	panas_5	Null	0.0391583
Whole Brain	panas_50	Experimental	0.0546547
Whole Brain	panas_50	Null	0.0216371
Whole Brain	panas_51	Experimental	0.184882
Whole Brain	panas_51	Null	0.0258903
Whole Brain	panas_52	Experimental	0.160191
Whole Brain	panas_52	Null	0.0269656
Whole Brain	panas_53	Experimental	0.0737739
Whole Brain	panas_53	Null	0.0271494
Whole Brain	panas_54	Experimental	0.105102
Whole Brain	panas_54	Null	0.0269763
Whole Brain	panas_55	Experimental	0.0352842
Whole Brain	panas_55	Null	0.0361952
Whole Brain	panas_56	Experimental	0.132836
Whole Brain	panas_56	Null	0.0347676
Whole Brain	panas_57	Experimental	0.153728
Whole Brain	panas_57	Null	0.025292
Whole Brain	panas_58	Experimental	0.11843
Whole Brain	panas_58	Null	0.0299712
Whole Brain	panas_59	Experimental	0.129598
Whole Brain	panas_59	Null	0.0363414
Whole Brain	panas_6	Experimental	0.00956028
Whole Brain	panas_6	Null	0.0351171
Whole Brain	panas_60	Experimental	0.148026
Whole Brain	panas_60	Null	0.0339894
Whole Brain	panas_7	Experimental	0.026758
Whole Brain	panas_7	Null	0.0246173
Whole Brain	panas_8	Experimental	0.173126
Whole Brain	panas_8	Null	0.0323586
Whole Brain	panas_9	Experimental	0.0825033
Whole Brain	panas_9	Null	0.025661
Whole Brain	psqi_1	Experimental	0.145388
Whole Brain	psqi_1	Null	0.032409
Whole Brain	psqi_10	Experimental	0.157799
Whole Brain	psqi_10	Null	0.0280535
Whole Brain	psqi_11	Experimental	0.143088
Whole Brain	psqi_11	Null	0.0291727
Whole Brain	psqi_12	Experimental	0.041816
Whole Brain	psqi_12	Null	0.0377875
Whole Brain	psqi_13	Experimental	0.0447126
Whole Brain	psqi_13	Null	0.0393891
Whole Brain	psqi_14	Experimental	0.0055693
Whole Brain	psqi_14	Null	0.0302098
Whole Brain	psqi_2	Experimental	0.208378
Whole Brain	psqi_2	Null	0.0367059
Whole Brain	psqi_3	Experimental	0.150996
Whole Brain	psqi_3	Null	0.0222812
Whole Brain	psqi_4	Experimental	0.100732
Whole Brain	psqi_4	Null	0.0318859
Whole Brain	psqi_5	Experimental	0.15495
Whole Brain	psqi_5	Null	0.0290221
Whole Brain	psqi_6	Experimental	0
Whole Brain	psqi_6	Null	0.0305683
Whole Brain	psqi_7	Experimental	0.00481257
Whole Brain	psqi_7	Null	0.0375988
Whole Brain	psqi_8	Experimental	0.0811427
Whole Brain	psqi_8	Null	0.039947
Whole Brain	psqi_9	Experimental	0.106487
Whole Brain	psqi_9	Null	0.0322532
Whole Brain	pss_1	Experimental	0
Whole Brain	pss_1	Null	0.0353547
Whole Brain	pss_10	Experimental	0
Whole Brain	pss_10	Null	0.021781
Whole Brain	pss_11	Experimental	0.0529851
Whole Brain	pss_11	Null	0.031748
Whole Brain	pss_12	Experimental	0.0272107
Whole Brain	pss_12	Null	0.0315899
Whole Brain	pss_13	Experimental	0.00108467
Whole Brain	pss_13	Null	0.0202723
Whole Brain	pss_14	Experimental	0.0226819
Whole Brain	pss_14	Null	0.0402024
Whole Brain	pss_2	Experimental	0.112541
Whole Brain	pss_2	Null	0.0336519
Whole Brain	pss_3	Experimental	0.186088
Whole Brain	pss_3	Null	0.030167
Whole Brain	pss_4	Experimental	0.0557955
Whole Brain	pss_4	Null	0.0297842
Whole Brain	pss_5	Experimental	0.0309336
Whole Brain	pss_5	Null	0.0284055
Whole Brain	pss_6	Experimental	0.156482
Whole Brain	pss_6	Null	0.031798
Whole Brain	pss_7	Experimental	0.0714953
Whole Brain	pss_7	Null	0.0281592
Whole Brain	pss_8	Experimental	0.0510713
Whole Brain	pss_8	Null	0.0279963
Whole Brain	pss_9	Experimental	0.128787
Whole Brain	pss_9	Null	0.0301621
cerebellum	atq_1	Experimental	0.0445224
cerebellum	atq_1	Null	0.0363686
cerebellum	atq_10	Experimental	0.15178
cerebellum	atq_10	Null	0.0250234
cerebellum	atq_11	Experimental	0.0788576
cerebellum	atq_11	Null	0.0247069
cerebellum	atq_12	Experimental	0.07818
cerebellum	atq_12	Null	0.0213554
cerebellum	atq_13	Experimental	0.02069
cerebellum	atq_13	Null	0.0327356
cerebellum	atq_14	Experimental	0
cerebellum	atq_14	Null	0.0292906
cerebellum	atq_15	Experimental	0.0376504
cerebellum	atq_15	Null	0.037139
cerebellum	atq_16	Experimental	0.137325
cerebellum	atq_16	Null	0.0264145
cerebellum	atq_17	Experimental	0.0415315
cerebellum	atq_17	Null	0.0381096
cerebellum	atq_18	Experimental	0.126943
cerebellum	atq_18	Null	0.0294318
cerebellum	atq_19	Experimental	0
cerebellum	atq_19	Null	0.0299912
cerebellum	atq_2	Experimental	0.0327495
cerebellum	atq_2	Null	0.0320854
cerebellum	atq_20	Experimental	0.119505
cerebellum	atq_20	Null	0.0300367
cerebellum	atq_21	Experimental	0.0748985
cerebellum	atq_21	Null	0.0350339
cerebellum	atq_22	Experimental	0.0017841
cerebellum	atq_22	Null	0.0350587
cerebellum	atq_23	Experimental	0.0473629
cerebellum	atq_23	Null	0.0360677
cerebellum	atq_24	Experimental	0.0637375
cerebellum	atq_24	Null	0.0303052
cerebellum	atq_25	Experimental	0.0279683
cerebellum	atq_25	Null	0.0257116
cerebellum	atq_26	Experimental	0.0113916
cerebellum	atq_26	Null	0.0355059
cerebellum	atq_27	Experimental	0
cerebellum	atq_27	Null	0.0327116
cerebellum	atq_28	Experimental	0.0859056
cerebellum	atq_28	Null	0.0349244
cerebellum	atq_29	Experimental	0
cerebellum	atq_29	Null	0.0326516
cerebellum	atq_3	Experimental	0.0011307
cerebellum	atq_3	Null	0.0361424
cerebellum	atq_30	Experimental	0.00956868
cerebellum	atq_30	Null	0.030087
cerebellum	atq_31	Experimental	0.247822
cerebellum	atq_31	Null	0.0345527
cerebellum	atq_32	Experimental	0.0992575
cerebellum	atq_32	Null	0.0297138
cerebellum	atq_33	Experimental	0.0398729
cerebellum	atq_33	Null	0.0331104
cerebellum	atq_34	Experimental	0
cerebellum	atq_34	Null	0.0321658
cerebellum	atq_35	Experimental	0.0735132
cerebellum	atq_35	Null	0.0243389
cerebellum	atq_36	Experimental	0.0108858
cerebellum	atq_36	Null	0.0263568
cerebellum	atq_37	Experimental	0.0845062
cerebellum	atq_37	Null	0.0322114
cerebellum	atq_38	Experimental	0.0713013
cerebellum	atq_38	Null	0.0278164
cerebellum	atq_39	Experimental	0
cerebellum	atq_39	Null	0.0329685
cerebellum	atq_4	Experimental	0.0376474
cerebellum	atq_4	Null	0.0297805
cerebellum	atq_40	Experimental	0.122595
cerebellum	atq_40	Null	0.0245404
cerebellum	atq_41	Experimental	0.0487662
cerebellum	atq_41	Null	0.0355448
cerebellum	atq_42	Experimental	0.145335
cerebellum	atq_42	Null	0.0371658
cerebellum	atq_43	Experimental	0.0842124
cerebellum	atq_43	Null	0.0362576
cerebellum	atq_44	Experimental	0.0475829
cerebellum	atq_44	Null	0.0336209
cerebellum	atq_45	Experimental	0.123308
cerebellum	atq_45	Null	0.0262869
cerebellum	atq_46	Experimental	0.00125326
cerebellum	atq_46	Null	0.034856
cerebellum	atq_47	Experimental	0.0230855
cerebellum	atq_47	Null	0.0337304
cerebellum	atq_48	Experimental	0.129303
cerebellum	atq_48	Null	0.0269646
cerebellum	atq_49	Experimental	0.0342469
cerebellum	atq_49	Null	0.0259095
cerebellum	atq_5	Experimental	0.00313732
cerebellum	atq_5	Null	0.0268704
cerebellum	atq_50	Experimental	0.0526239
cerebellum	atq_50	Null	0.0285505
cerebellum	atq_51	Experimental	0.00267013
cerebellum	atq_51	Null	0.0312929
cerebellum	atq_52	Experimental	0.0160009
cerebellum	atq_52	Null	0.0355783
cerebellum	atq_53	Experimental	0.0128247
cerebellum	atq_53	Null	0.032413
cerebellum	atq_54	Experimental	0.124226
cerebellum	atq_54	Null	0.0229414
cerebellum	atq_55	Experimental	0.0728791
cerebellum	atq_55	Null	0.0342645
cerebellum	atq_56	Experimental	0.144254
cerebellum	atq_56	Null	0.0381487
cerebellum	atq_57	Experimental	0
cerebellum	atq_57	Null	0.0288183
cerebellum	atq_58	Experimental	0.0606128
cerebellum	atq_58	Null	0.033387
cerebellum	atq_59	Experimental	0.152186
cerebellum	atq_59	Null	0.0460708
cerebellum	atq_6	Experimental	0.00497138
cerebellum	atq_6	Null	0.0245083
cerebellum	atq_60	Experimental	0.0403028
cerebellum	atq_60	Null	0.0391326
cerebellum	atq_61	Experimental	0.129382
cerebellum	atq_61	Null	0.0236516
cerebellum	atq_62	Experimental	0
cerebellum	atq_62	Null	0.0267978
cerebellum	atq_63	Experimental	0.0106893
cerebellum	atq_63	Null	0.0292669
cerebellum	atq_64	Experimental	0.0227411
cerebellum	atq_64	Null	0.0294087
cerebellum	atq_65	Experimental	0.213856
cerebellum	atq_65	Null	0.0263391
cerebellum	atq_66	Experimental	0
cerebellum	atq_66	Null	0.0263178
cerebellum	atq_67	Experimental	0
cerebellum	atq_67	Null	0.0277706
cerebellum	atq_68	Experimental	0.0758357
cerebellum	atq_68	Null	0.0348916
cerebellum	atq_69	Experimental	0.0437319
cerebellum	atq_69	Null	0.0295731
cerebellum	atq_7	Experimental	0.118099
cerebellum	atq_7	Null	0.0274051
cerebellum	atq_70	Experimental	0.0865865
cerebellum	atq_70	Null	0.0250011
cerebellum	atq_71	Experimental	0.0730989
cerebellum	atq_71	Null	0.0338538
cerebellum	atq_72	Experimental	0.105483
cerebellum	atq_72	Null	0.0358558
cerebellum	atq_73	Experimental	0.00817202
cerebellum	atq_73	Null	0.0343802
cerebellum	atq_74	Experimental	0
cerebellum	atq_74	Null	0.0263909
cerebellum	atq_75	Experimental	0
cerebellum	atq_75	Null	0.0300105
cerebellum	atq_76	Experimental	0.0782715
cerebellum	atq_76	Null	0.0341
cerebellum	atq_77	Experimental	0.0592633
cerebellum	atq_77	Null	0.0401105
cerebellum	atq_8	Experimental	0.00179824
cerebellum	atq_8	Null	0.0299217
cerebellum	atq_9	Experimental	0.052913
cerebellum	atq_9	Null	0.0295376
cerebellum	brief_1	Experimental	0.157763
cerebellum	brief_1	Null	0.0294867
cerebellum	brief_10	Experimental	0.0409013
cerebellum	brief_10	Null	0.0358114
cerebellum	brief_11	Experimental	0.0174782
cerebellum	brief_11	Null	0.0276087
cerebellum	brief_12	Experimental	0.0355415
cerebellum	brief_12	Null	0.0301148
cerebellum	brief_13	Experimental	0.0720219
cerebellum	brief_13	Null	0.0286647
cerebellum	brief_14	Experimental	0.0511946
cerebellum	brief_14	Null	0.0295505
cerebellum	brief_15	Experimental	0.000200987
cerebellum	brief_15	Null	0.0336231
cerebellum	brief_16	Experimental	0.0435309
cerebellum	brief_16	Null	0.0332871
cerebellum	brief_17	Experimental	0.0741765
cerebellum	brief_17	Null	0.0362946
cerebellum	brief_18	Experimental	0.0594869
cerebellum	brief_18	Null	0.0352388
cerebellum	brief_19	Experimental	0.199087
cerebellum	brief_19	Null	0.0262156
cerebellum	brief_2	Experimental	0.0442853
cerebellum	brief_2	Null	0.0277872
cerebellum	brief_20	Experimental	0.0563896
cerebellum	brief_20	Null	0.0276019
cerebellum	brief_21	Experimental	0.00124317
cerebellum	brief_21	Null	0.0261373
cerebellum	brief_22	Experimental	0.0329562
cerebellum	brief_22	Null	0.0422178
cerebellum	brief_23	Experimental	0.0701843
cerebellum	brief_23	Null	0.0356363
cerebellum	brief_24	Experimental	0.0020928
cerebellum	brief_24	Null	0.0280691
cerebellum	brief_25	Experimental	0.012343
cerebellum	brief_25	Null	0.0360334
cerebellum	brief_26	Experimental	0.0414036
cerebellum	brief_26	Null	0.0295775
cerebellum	brief_27	Experimental	0.0250998
cerebellum	brief_27	Null	0.0355401
cerebellum	brief_28	Experimental	0.0996246
cerebellum	brief_28	Null	0.0350321
cerebellum	brief_29	Experimental	0.0760749
cerebellum	brief_29	Null	0.0398263
cerebellum	brief_3	Experimental	6.11008e-06
cerebellum	brief_3	Null	0.0352476
cerebellum	brief_30	Experimental	0.00732824
cerebellum	brief_30	Null	0.0245034
cerebellum	brief_31	Experimental	0.0276333
cerebellum	brief_31	Null	0.0330068
cerebellum	brief_32	Experimental	0.0875889
cerebellum	brief_32	Null	0.0210129
cerebellum	brief_33	Experimental	0.0794494
cerebellum	brief_33	Null	0.029655
cerebellum	brief_34	Experimental	0.0292576
cerebellum	brief_34	Null	0.0393294
cerebellum	brief_35	Experimental	0.055094
cerebellum	brief_35	Null	0.0407847
cerebellum	brief_36	Experimental	0.000864655
cerebellum	brief_36	Null	0.0440896
cerebellum	brief_37	Experimental	0.0418085
cerebellum	brief_37	Null	0.0362075
cerebellum	brief_38	Experimental	0.0169519
cerebellum	brief_38	Null	0.0259618
cerebellum	brief_39	Experimental	0.0369265
cerebellum	brief_39	Null	0.0359714
cerebellum	brief_4	Experimental	0.00446004
cerebellum	brief_4	Null	0.0365239
cerebellum	brief_40	Experimental	0.0694324
cerebellum	brief_40	Null	0.0328964
cerebellum	brief_41	Experimental	0.0156821
cerebellum	brief_41	Null	0.0301242
cerebellum	brief_42	Experimental	0.0554332
cerebellum	brief_42	Null	0.0321455
cerebellum	brief_43	Experimental	0.0872909
cerebellum	brief_43	Null	0.0196286
cerebellum	brief_44	Experimental	0.116508
cerebellum	brief_44	Null	0.0328013
cerebellum	brief_45	Experimental	0.121458
cerebellum	brief_45	Null	0.026778
cerebellum	brief_46	Experimental	0.016317
cerebellum	brief_46	Null	0.0351677
cerebellum	brief_47	Experimental	0.030868
cerebellum	brief_47	Null	0.0394714
cerebellum	brief_48	Experimental	0.104582
cerebellum	brief_48	Null	0.0331226
cerebellum	brief_49	Experimental	0.111432
cerebellum	brief_49	Null	0.0344781
cerebellum	brief_5	Experimental	0.192896
cerebellum	brief_5	Null	0.0271548
cerebellum	brief_50	Experimental	0.0224764
cerebellum	brief_50	Null	0.0253652
cerebellum	brief_51	Experimental	0.0945542
cerebellum	brief_51	Null	0.027992
cerebellum	brief_52	Experimental	0.0672509
cerebellum	brief_52	Null	0.0213512
cerebellum	brief_53	Experimental	0.0796027
cerebellum	brief_53	Null	0.0387064
cerebellum	brief_54	Experimental	0.0502619
cerebellum	brief_54	Null	0.0301151
cerebellum	brief_55	Experimental	0.0845917
cerebellum	brief_55	Null	0.0311618
cerebellum	brief_56	Experimental	0.0402178
cerebellum	brief_56	Null	0.0365733
cerebellum	brief_57	Experimental	0.0937205
cerebellum	brief_57	Null	0.0337047
cerebellum	brief_58	Experimental	0.210157
cerebellum	brief_58	Null	0.0331887
cerebellum	brief_59	Experimental	0.201294
cerebellum	brief_59	Null	0.0316343
cerebellum	brief_6	Experimental	0.118391
cerebellum	brief_6	Null	0.0304728
cerebellum	brief_60	Experimental	0.111491
cerebellum	brief_60	Null	0.0351828
cerebellum	brief_61	Experimental	0.0909484
cerebellum	brief_61	Null	0.0342663
cerebellum	brief_62	Experimental	0.0976138
cerebellum	brief_62	Null	0.0364749
cerebellum	brief_63	Experimental	0.00695151
cerebellum	brief_63	Null	0.030649
cerebellum	brief_64	Experimental	0.0197318
cerebellum	brief_64	Null	0.0286235
cerebellum	brief_65	Experimental	0.0406625
cerebellum	brief_65	Null	0.0383027
cerebellum	brief_66	Experimental	0.0404826
cerebellum	brief_66	Null	0.0337268
cerebellum	brief_67	Experimental	0.0278611
cerebellum	brief_67	Null	0.0304584
cerebellum	brief_68	Experimental	0
cerebellum	brief_68	Null	0.0358215
cerebellum	brief_69	Experimental	0.121308
cerebellum	brief_69	Null	0.0334477
cerebellum	brief_7	Experimental	0.118249
cerebellum	brief_7	Null	0.0337355
cerebellum	brief_70	Experimental	0.0438729
cerebellum	brief_70	Null	0.0351504
cerebellum	brief_71	Experimental	0.000121322
cerebellum	brief_71	Null	0.0300071
cerebellum	brief_72	Experimental	0.154965
cerebellum	brief_72	Null	0.0296293
cerebellum	brief_73	Experimental	0.161069
cerebellum	brief_73	Null	0.0342304
cerebellum	brief_74	Experimental	0.0583572
cerebellum	brief_74	Null	0.0421587
cerebellum	brief_75	Experimental	0.0722775
cerebellum	brief_75	Null	0.0270626
cerebellum	brief_8	Experimental	0.0190138
cerebellum	brief_8	Null	0.0310104
cerebellum	brief_9	Experimental	0.00187379
cerebellum	brief_9	Null	0.0292491
cerebellum	bsi_1	Experimental	0.0888615
cerebellum	bsi_1	Null	0.02442
cerebellum	bsi_10	Experimental	0.0141353
cerebellum	bsi_10	Null	0.0324573
cerebellum	bsi_11	Experimental	0.0389085
cerebellum	bsi_11	Null	0.0290428
cerebellum	bsi_12	Experimental	0.0412639
cerebellum	bsi_12	Null	0.0355391
cerebellum	bsi_13	Experimental	0.110226
cerebellum	bsi_13	Null	0.0316769
cerebellum	bsi_14	Experimental	0.00501274
cerebellum	bsi_14	Null	0.0384483
cerebellum	bsi_15	Experimental	0.00980959
cerebellum	bsi_15	Null	0.0366885
cerebellum	bsi_16	Experimental	0.20079
cerebellum	bsi_16	Null	0.0330937
cerebellum	bsi_17	Experimental	0.121126
cerebellum	bsi_17	Null	0.0376882
cerebellum	bsi_18	Experimental	0.0699381
cerebellum	bsi_18	Null	0.0265604
cerebellum	bsi_19	Experimental	0.0754442
cerebellum	bsi_19	Null	0.0353777
cerebellum	bsi_2	Experimental	0.0123621
cerebellum	bsi_2	Null	0.0320456
cerebellum	bsi_20	Experimental	0.101969
cerebellum	bsi_20	Null	0.0340508
cerebellum	bsi_21	Experimental	0.021572
cerebellum	bsi_21	Null	0.0289784
cerebellum	bsi_22	Experimental	0.0183589
cerebellum	bsi_22	Null	0.0328626
cerebellum	bsi_23	Experimental	0.0642988
cerebellum	bsi_23	Null	0.0348347
cerebellum	bsi_24	Experimental	0.0338086
cerebellum	bsi_24	Null	0.0257061
cerebellum	bsi_25	Experimental	0.0531971
cerebellum	bsi_25	Null	0.0301352
cerebellum	bsi_26	Experimental	0.12647
cerebellum	bsi_26	Null	0.0279345
cerebellum	bsi_27	Experimental	0.0132872
cerebellum	bsi_27	Null	0.0253257
cerebellum	bsi_28	Experimental	0.0794216
cerebellum	bsi_28	Null	0.035587
cerebellum	bsi_29	Experimental	0.00045708
cerebellum	bsi_29	Null	0.0327195
cerebellum	bsi_3	Experimental	0.0274692
cerebellum	bsi_3	Null	0.0283181
cerebellum	bsi_30	Experimental	0.0268669
cerebellum	bsi_30	Null	0.025368
cerebellum	bsi_31	Experimental	0.0210067
cerebellum	bsi_31	Null	0.0389864
cerebellum	bsi_32	Experimental	0.0549429
cerebellum	bsi_32	Null	0.0306721
cerebellum	bsi_33	Experimental	0.0994516
cerebellum	bsi_33	Null	0.028073
cerebellum	bsi_34	Experimental	0.143206
cerebellum	bsi_34	Null	0.0267818
cerebellum	bsi_35	Experimental	0.104464
cerebellum	bsi_35	Null	0.031772
cerebellum	bsi_36	Experimental	0.147336
cerebellum	bsi_36	Null	0.028972
cerebellum	bsi_37	Experimental	0
cerebellum	bsi_37	Null	0.0300597
cerebellum	bsi_38	Experimental	3.45041e-06
cerebellum	bsi_38	Null	0.026187
cerebellum	bsi_4	Experimental	0.0840802
cerebellum	bsi_4	Null	0.0325451
cerebellum	bsi_41	Experimental	0.0296624
cerebellum	bsi_41	Null	0.0277052
cerebellum	bsi_42	Experimental	0.0348476
cerebellum	bsi_42	Null	0.0366363
cerebellum	bsi_43	Experimental	0.110671
cerebellum	bsi_43	Null	0.0442046
cerebellum	bsi_44	Experimental	0.0144074
cerebellum	bsi_44	Null	0.0265292
cerebellum	bsi_45	Experimental	0.148493
cerebellum	bsi_45	Null	0.0346292
cerebellum	bsi_46	Experimental	0.135188
cerebellum	bsi_46	Null	0.0344522
cerebellum	bsi_47	Experimental	0.000706762
cerebellum	bsi_47	Null	0.0305366
cerebellum	bsi_48	Experimental	0.0130953
cerebellum	bsi_48	Null	0.0300552
cerebellum	bsi_49	Experimental	0.0941337
cerebellum	bsi_49	Null	0.0313324
cerebellum	bsi_5	Experimental	0.00453702
cerebellum	bsi_5	Null	0.0293926
cerebellum	bsi_50	Experimental	0.0527415
cerebellum	bsi_50	Null	0.0306172
cerebellum	bsi_51	Experimental	0
cerebellum	bsi_51	Null	0.0380932
cerebellum	bsi_52	Experimental	0.165187
cerebellum	bsi_52	Null	0.0339503
cerebellum	bsi_53	Experimental	0.126414
cerebellum	bsi_53	Null	0.0359443
cerebellum	bsi_6	Experimental	0.227818
cerebellum	bsi_6	Null	0.0411127
cerebellum	bsi_7	Experimental	0.063979
cerebellum	bsi_7	Null	0.0258793
cerebellum	bsi_8	Experimental	0.0153483
cerebellum	bsi_8	Null	0.0259034
cerebellum	iri_1	Experimental	0.00119132
cerebellum	iri_1	Null	0.0317431
cerebellum	iri_10	Experimental	0.123444
cerebellum	iri_10	Null	0.0307145
cerebellum	iri_11	Experimental	0.00361633
cerebellum	iri_11	Null	0.0297779
cerebellum	iri_12	Experimental	0.0722582
cerebellum	iri_12	Null	0.028864
cerebellum	iri_13	Experimental	0.00301175
cerebellum	iri_13	Null	0.0394173
cerebellum	iri_14	Experimental	0.00910968
cerebellum	iri_14	Null	0.0308066
cerebellum	iri_15	Experimental	0.077805
cerebellum	iri_15	Null	0.0337941
cerebellum	iri_16	Experimental	0.00955617
cerebellum	iri_16	Null	0.0347096
cerebellum	iri_17	Experimental	0.233815
cerebellum	iri_17	Null	0.0344176
cerebellum	iri_18	Experimental	0.0899112
cerebellum	iri_18	Null	0.0270715
cerebellum	iri_19	Experimental	0.000808085
cerebellum	iri_19	Null	0.0271201
cerebellum	iri_2	Experimental	0
cerebellum	iri_2	Null	0.0344008
cerebellum	iri_20	Experimental	0.0561096
cerebellum	iri_20	Null	0.0370375
cerebellum	iri_21	Experimental	0
cerebellum	iri_21	Null	0.0290385
cerebellum	iri_22	Experimental	0.0443857
cerebellum	iri_22	Null	0.0375277
cerebellum	iri_23	Experimental	0
cerebellum	iri_23	Null	0.0329561
cerebellum	iri_24	Experimental	8.13211e-05
cerebellum	iri_24	Null	0.027281
cerebellum	iri_25	Experimental	0.00115756
cerebellum	iri_25	Null	0.0302448
cerebellum	iri_26	Experimental	0.0895369
cerebellum	iri_26	Null	0.0245571
cerebellum	iri_27	Experimental	0.0843022
cerebellum	iri_27	Null	0.0365789
cerebellum	iri_28	Experimental	0.142433
cerebellum	iri_28	Null	0.0295289
cerebellum	iri_3	Experimental	0.0243722
cerebellum	iri_3	Null	0.0318397
cerebellum	iri_4	Experimental	0.0104257
cerebellum	iri_4	Null	0.0222814
cerebellum	iri_5	Experimental	0.0906931
cerebellum	iri_5	Null	0.0327537
cerebellum	iri_6	Experimental	0.0395234
cerebellum	iri_6	Null	0.0268169
cerebellum	iri_7	Experimental	0.0341182
cerebellum	iri_7	Null	0.0189152
cerebellum	iri_8	Experimental	0.000806554
cerebellum	iri_8	Null	0.0323662
cerebellum	iri_9	Experimental	0.00322201
cerebellum	iri_9	Null	0.0274215
cerebellum	panas_1	Experimental	0.0146873
cerebellum	panas_1	Null	0.0298515
cerebellum	panas_10	Experimental	0.0745094
cerebellum	panas_10	Null	0.0376202
cerebellum	panas_11	Experimental	0.135635
cerebellum	panas_11	Null	0.0331814
cerebellum	panas_12	Experimental	0.0153157
cerebellum	panas_12	Null	0.0335005
cerebellum	panas_13	Experimental	0.0173967
cerebellum	panas_13	Null	0.0241286
cerebellum	panas_14	Experimental	0.0452576
cerebellum	panas_14	Null	0.0303245
cerebellum	panas_15	Experimental	0.130591
cerebellum	panas_15	Null	0.0384066
cerebellum	panas_16	Experimental	0.0897484
cerebellum	panas_16	Null	0.0293856
cerebellum	panas_17	Experimental	0.151453
cerebellum	panas_17	Null	0.0369478
cerebellum	panas_18	Experimental	0.113623
cerebellum	panas_18	Null	0.0307064
cerebellum	panas_19	Experimental	0.0117855
cerebellum	panas_19	Null	0.0282648
cerebellum	panas_2	Experimental	0.171182
cerebellum	panas_2	Null	0.0280506
cerebellum	panas_20	Experimental	0
cerebellum	panas_20	Null	0.0360745
cerebellum	panas_21	Experimental	0.0149561
cerebellum	panas_21	Null	0.0304396
cerebellum	panas_22	Experimental	0.042564
cerebellum	panas_22	Null	0.0328846
cerebellum	panas_23	Experimental	0.0110377
cerebellum	panas_23	Null	0.0255132
cerebellum	panas_24	Experimental	0.136835
cerebellum	panas_24	Null	0.0281439
cerebellum	panas_25	Experimental	0.00632666
cerebellum	panas_25	Null	0.036447
cerebellum	panas_26	Experimental	0.10748
cerebellum	panas_26	Null	0.0284153
cerebellum	panas_27	Experimental	0.0991659
cerebellum	panas_27	Null	0.0293358
cerebellum	panas_28	Experimental	0.111224
cerebellum	panas_28	Null	0.027968
cerebellum	panas_29	Experimental	0.0818503
cerebellum	panas_29	Null	0.0265785
cerebellum	panas_3	Experimental	0.048048
cerebellum	panas_3	Null	0.0282213
cerebellum	panas_30	Experimental	0.00769135
cerebellum	panas_30	Null	0.0374938
cerebellum	panas_31	Experimental	0
cerebellum	panas_31	Null	0.0241745
cerebellum	panas_32	Experimental	0.104783
cerebellum	panas_32	Null	0.0309153
cerebellum	panas_33	Experimental	0.0463099
cerebellum	panas_33	Null	0.0314616
cerebellum	panas_34	Experimental	0.0454538
cerebellum	panas_34	Null	0.0256201
cerebellum	panas_35	Experimental	0.19967
cerebellum	panas_35	Null	0.0323995
cerebellum	panas_36	Experimental	0.0335625
cerebellum	panas_36	Null	0.0316047
cerebellum	panas_37	Experimental	0.132514
cerebellum	panas_37	Null	0.0269573
cerebellum	panas_38	Experimental	0.0679589
cerebellum	panas_38	Null	0.0267031
cerebellum	panas_39	Experimental	0.0719704
cerebellum	panas_39	Null	0.0345856
cerebellum	panas_4	Experimental	0.129011
cerebellum	panas_4	Null	0.0330657
cerebellum	panas_40	Experimental	0.00149896
cerebellum	panas_40	Null	0.0305087
cerebellum	panas_41	Experimental	0.0011601
cerebellum	panas_41	Null	0.0342211
cerebellum	panas_42	Experimental	0.154567
cerebellum	panas_42	Null	0.0300284
cerebellum	panas_43	Experimental	0.131448
cerebellum	panas_43	Null	0.0373119
cerebellum	panas_44	Experimental	0.122058
cerebellum	panas_44	Null	0.0307901
cerebellum	panas_45	Experimental	0.00560586
cerebellum	panas_45	Null	0.0322543
cerebellum	panas_46	Experimental	0.112169
cerebellum	panas_46	Null	0.0249264
cerebellum	panas_47	Experimental	0.000534941
cerebellum	panas_47	Null	0.0298907
cerebellum	panas_48	Experimental	0.0338778
cerebellum	panas_48	Null	0.0301521
cerebellum	panas_49	Experimental	0.0648704
cerebellum	panas_49	Null	0.030353
cerebellum	panas_5	Experimental	0.0606234
cerebellum	panas_5	Null	0.0448023
cerebellum	panas_50	Experimental	0.0745008
cerebellum	panas_50	Null	0.0266983
cerebellum	panas_51	Experimental	0.226046
cerebellum	panas_51	Null	0.0291287
cerebellum	panas_52	Experimental	0.122417
cerebellum	panas_52	Null	0.0249076
cerebellum	panas_53	Experimental	0.0498133
cerebellum	panas_53	Null	0.0333161
cerebellum	panas_54	Experimental	0.0602627
cerebellum	panas_54	Null	0.0307194
cerebellum	panas_55	Experimental	0.0510986
cerebellum	panas_55	Null	0.0362082
cerebellum	panas_56	Experimental	0.146156
cerebellum	panas_56	Null	0.0274401
cerebellum	panas_57	Experimental	0.0163487
cerebellum	panas_57	Null	0.0332499
cerebellum	panas_58	Experimental	0.00901489
cerebellum	panas_58	Null	0.0296562
cerebellum	panas_59	Experimental	0.00109982
cerebellum	panas_59	Null	0.0313274
cerebellum	panas_6	Experimental	0
cerebellum	panas_6	Null	0.0307344
cerebellum	panas_60	Experimental	0.185209
cerebellum	panas_60	Null	0.0279744
cerebellum	panas_7	Experimental	0.0526249
cerebellum	panas_7	Null	0.0361697
cerebellum	panas_8	Experimental	0.0384641
cerebellum	panas_8	Null	0.0332059
cerebellum	panas_9	Experimental	0.107831
cerebellum	panas_9	Null	0.0256314
cerebellum	psqi_1	Experimental	0.102624
cerebellum	psqi_1	Null	0.0306648
cerebellum	psqi_10	Experimental	0.139508
cerebellum	psqi_10	Null	0.0354466
cerebellum	psqi_11	Experimental	0.178458
cerebellum	psqi_11	Null	0.0275957
cerebellum	psqi_12	Experimental	0.000705736
cerebellum	psqi_12	Null	0.0377026
cerebellum	psqi_13	Experimental	0.0697817
cerebellum	psqi_13	Null	0.0362935
cerebellum	psqi_14	Experimental	0.157219
cerebellum	psqi_14	Null	0.0297467
cerebellum	psqi_2	Experimental	0.0630096
cerebellum	psqi_2	Null	0.0322423
cerebellum	psqi_3	Experimental	0.109713
cerebellum	psqi_3	Null	0.032323
cerebellum	psqi_4	Experimental	0.00416218
cerebellum	psqi_4	Null	0.0289341
cerebellum	psqi_5	Experimental	0.127598
cerebellum	psqi_5	Null	0.0296621
cerebellum	psqi_6	Experimental	0.0198128
cerebellum	psqi_6	Null	0.0332533
cerebellum	psqi_7	Experimental	0.00210154
cerebellum	psqi_7	Null	0.030057
cerebellum	psqi_8	Experimental	0.0904119
cerebellum	psqi_8	Null	0.0250704
cerebellum	psqi_9	Experimental	0.0295207
cerebellum	psqi_9	Null	0.0354577
cerebellum	pss_1	Experimental	0
cerebellum	pss_1	Null	0.0372074
cerebellum	pss_10	Experimental	0.0352988
cerebellum	pss_10	Null	0.0410168
cerebellum	pss_11	Experimental	0.0641495
cerebellum	pss_11	Null	0.0261119
cerebellum	pss_12	Experimental	0.0237182
cerebellum	pss_12	Null	0.0259596
cerebellum	pss_13	Experimental	0.00268137
cerebellum	pss_13	Null	0.0277449
cerebellum	pss_14	Experimental	0.0372235
cerebellum	pss_14	Null	0.0386868
cerebellum	pss_2	Experimental	0.00110942
cerebellum	pss_2	Null	0.0240704
cerebellum	pss_3	Experimental	0.0264058
cerebellum	pss_3	Null	0.0309507
cerebellum	pss_4	Experimental	0.119713
cerebellum	pss_4	Null	0.0420594
cerebellum	pss_5	Experimental	0.00471223
cerebellum	pss_5	Null	0.0234238
cerebellum	pss_6	Experimental	0
cerebellum	pss_6	Null	0.0344509
cerebellum	pss_7	Experimental	0.0177915
cerebellum	pss_7	Null	0.03256
cerebellum	pss_8	Experimental	0.0853796
cerebellum	pss_8	Null	0.0334919
cerebellum	pss_9	Experimental	0.0620051
cerebellum	pss_9	Null	0.0321379
default mode	atq_1	Experimental	0.0612089
default mode	atq_1	Null	0.0333226
default mode	atq_10	Experimental	0.000168818
default mode	atq_10	Null	0.0325585
default mode	atq_11	Experimental	0.137594
default mode	atq_11	Null	0.0256504
default mode	atq_12	Experimental	0.0112894
default mode	atq_12	Null	0.0331934
default mode	atq_13	Experimental	0.0158577
default mode	atq_13	Null	0.0343653
default mode	atq_14	Experimental	0.000403839
default mode	atq_14	Null	0.0335953
default mode	atq_15	Experimental	0.022998
default mode	atq_15	Null	0.0303852
default mode	atq_16	Experimental	0.00173307
default mode	atq_16	Null	0.0282931
default mode	atq_17	Experimental	0.0395177
default mode	atq_17	Null	0.037264
default mode	atq_18	Experimental	0.0145058
default mode	atq_18	Null	0.0348618
default mode	atq_19	Experimental	0.0146039
default mode	atq_19	Null	0.0382866
default mode	atq_2	Experimental	0.0866695
default mode	atq_2	Null	0.037214
default mode	atq_20	Experimental	0.0235102
default mode	atq_20	Null	0.0376494
default mode	atq_21	Experimental	0.00202091
default mode	atq_21	Null	0.0328555
default mode	atq_22	Experimental	0.0995085
default mode	atq_22	Null	0.0270122
default mode	atq_23	Experimental	0.00663559
default mode	atq_23	Null	0.0303649
default mode	atq_24	Experimental	0.000438753
default mode	atq_24	Null	0.0330673
default mode	atq_25	Experimental	0.011603
default mode	atq_25	Null	0.0370894
default mode	atq_26	Experimental	0.0261534
default mode	atq_26	Null	0.0248941
default mode	atq_27	Experimental	0.124221
default mode	atq_27	Null	0.0279049
default mode	atq_28	Experimental	0.0252941
default mode	atq_28	Null	0.0335431
default mode	atq_29	Experimental	0.0915225
default mode	atq_29	Null	0.0296729
default mode	atq_3	Experimental	0.0192335
default mode	atq_3	Null	0.0292292
default mode	atq_30	Experimental	0.012006
default mode	atq_30	Null	0.02985
default mode	atq_31	Experimental	0.0802419
default mode	atq_31	Null	0.0392405
default mode	atq_32	Experimental	0.133361
default mode	atq_32	Null	0.0343065
default mode	atq_33	Experimental	0.221403
default mode	atq_33	Null	0.0314131
default mode	atq_34	Experimental	0.00215392
default mode	atq_34	Null	0.0259083
default mode	atq_35	Experimental	0.00680781
default mode	atq_35	Null	0.0349415
default mode	atq_36	Experimental	0.0224569
default mode	atq_36	Null	0.0302142
default mode	atq_37	Experimental	0.00186113
default mode	atq_37	Null	0.0328387
default mode	atq_38	Experimental	0.0511857
default mode	atq_38	Null	0.032926
default mode	atq_39	Experimental	0.0713587
default mode	atq_39	Null	0.0340995
default mode	atq_4	Experimental	0.0670458
default mode	atq_4	Null	0.0272901
default mode	atq_40	Experimental	0.146756
default mode	atq_40	Null	0.0378823
default mode	atq_41	Experimental	0.0497648
default mode	atq_41	Null	0.0308944
default mode	atq_42	Experimental	0.107224
default mode	atq_42	Null	0.0333699
default mode	atq_43	Experimental	0.000309419
default mode	atq_43	Null	0.0328963
default mode	atq_44	Experimental	0.117489
default mode	atq_44	Null	0.0296651
default mode	atq_45	Experimental	0.0697641
default mode	atq_45	Null	0.0281686
default mode	atq_46	Experimental	0.231307
default mode	atq_46	Null	0.0261407
default mode	atq_47	Experimental	0.209219
default mode	atq_47	Null	0.029149
default mode	atq_48	Experimental	0.00348836
default mode	atq_48	Null	0.0376848
default mode	atq_49	Experimental	0.00922754
default mode	atq_49	Null	0.0283022
default mode	atq_5	Experimental	0.0456422
default mode	atq_5	Null	0.0363259
default mode	atq_50	Experimental	0.111685
default mode	atq_50	Null	0.0240156
default mode	atq_51	Experimental	0.00285401
default mode	atq_51	Null	0.0298221
default mode	atq_52	Experimental	0.0458747
default mode	atq_52	Null	0.0246074
default mode	atq_53	Experimental	0
default mode	atq_53	Null	0.0325766
default mode	atq_54	Experimental	0.119109
default mode	atq_54	Null	0.0310177
default mode	atq_55	Experimental	0.164646
default mode	atq_55	Null	0.0304734
default mode	atq_56	Experimental	0.000176095
default mode	atq_56	Null	0.0334169
default mode	atq_57	Experimental	0.0285901
default mode	atq_57	Null	0.0336613
default mode	atq_58	Experimental	0.181069
default mode	atq_58	Null	0.0401786
default mode	atq_59	Experimental	0.144894
default mode	atq_59	Null	0.0321877
default mode	atq_6	Experimental	0.10375
default mode	atq_6	Null	0.0341164
default mode	atq_60	Experimental	0.000127322
default mode	atq_60	Null	0.0297308
default mode	atq_61	Experimental	0.0649657
default mode	atq_61	Null	0.0342472
default mode	atq_62	Experimental	0.0153667
default mode	atq_62	Null	0.0318501
default mode	atq_63	Experimental	0.00124156
default mode	atq_63	Null	0.0349946
default mode	atq_64	Experimental	0.0266628
default mode	atq_64	Null	0.0293815
default mode	atq_65	Experimental	0.0033001
default mode	atq_65	Null	0.0325669
default mode	atq_66	Experimental	0.134862
default mode	atq_66	Null	0.0267847
default mode	atq_67	Experimental	0.00580399
default mode	atq_67	Null	0.0326013
default mode	atq_68	Experimental	0.151376
default mode	atq_68	Null	0.022558
default mode	atq_69	Experimental	0.00473655
default mode	atq_69	Null	0.0302294
default mode	atq_7	Experimental	0.0363679
default mode	atq_7	Null	0.0275409
default mode	atq_70	Experimental	0.171986
default mode	atq_70	Null	0.0324135
default mode	atq_71	Experimental	0.158591
default mode	atq_71	Null	0.0400819
default mode	atq_72	Experimental	0.00987688
default mode	atq_72	Null	0.0420819
default mode	atq_73	Experimental	0.000585747
default mode	atq_73	Null	0.0364059
default mode	atq_74	Experimental	0.0826297
default mode	atq_74	Null	0.0283561
default mode	atq_75	Experimental	0.0782525
default mode	atq_75	Null	0.0346936
default mode	atq_76	Experimental	0.0393984
default mode	atq_76	Null	0.0274232
default mode	atq_77	Experimental	0.000102978
default mode	atq_77	Null	0.0255036
default mode	atq_8	Experimental	0.0387423
default mode	atq_8	Null	0.027852
default mode	atq_9	Experimental	0.00229618
default mode	atq_9	Null	0.03382
default mode	brief_1	Experimental	0.0222492
default mode	brief_1	Null	0.0321502
default mode	brief_10	Experimental	0.00251227
default mode	brief_10	Null	0.0248723
default mode	brief_11	Experimental	0
default mode	brief_11	Null	0.0312454
default mode	brief_12	Experimental	0.101807
default mode	brief_12	Null	0.0316442
default mode	brief_13	Experimental	0.0579104
default mode	brief_13	Null	0.0369814
default mode	brief_14	Experimental	0.0441495
default mode	brief_14	Null	0.0292322
default mode	brief_15	Experimental	0.105197
default mode	brief_15	Null	0.0248009
default mode	brief_16	Experimental	0.144872
default mode	brief_16	Null	0.0288874
default mode	brief_17	Experimental	0.0387355
default mode	brief_17	Null	0.022395
default mode	brief_18	Experimental	0
default mode	brief_18	Null	0.0253364
default mode	brief_19	Experimental	0.0156409
default mode	brief_19	Null	0.0336323
default mode	brief_2	Experimental	0
default mode	brief_2	Null	0.0293222
default mode	brief_20	Experimental	0.00195596
default mode	brief_20	Null	0.0308349
default mode	brief_21	Experimental	0.0890202
default mode	brief_21	Null	0.0251434
default mode	brief_22	Experimental	0.00135906
default mode	brief_22	Null	0.0341654
default mode	brief_23	Experimental	0.00117875
default mode	brief_23	Null	0.0335518
default mode	brief_24	Experimental	0.104606
default mode	brief_24	Null	0.0253788
default mode	brief_25	Experimental	0.0200434
default mode	brief_25	Null	0.0294566
default mode	brief_26	Experimental	0.000766548
default mode	brief_26	Null	0.0318539
default mode	brief_27	Experimental	0.0175277
default mode	brief_27	Null	0.0277607
default mode	brief_28	Experimental	0.0648166
default mode	brief_28	Null	0.0303487
default mode	brief_29	Experimental	0
default mode	brief_29	Null	0.0386361
default mode	brief_3	Experimental	0.0298397
default mode	brief_3	Null	0.0388317
default mode	brief_30	Experimental	0.00118216
default mode	brief_30	Null	0.0326274
default mode	brief_31	Experimental	0.0479984
default mode	brief_31	Null	0.036299
default mode	brief_32	Experimental	0.0413333
default mode	brief_32	Null	0.0271177
default mode	brief_33	Experimental	0.0996419
default mode	brief_33	Null	0.0359818
default mode	brief_34	Experimental	0.0147494
default mode	brief_34	Null	0.0333172
default mode	brief_35	Experimental	0.0171979
default mode	brief_35	Null	0.0306298
default mode	brief_36	Experimental	0.0126586
default mode	brief_36	Null	0.0314305
default mode	brief_37	Experimental	0.000740047
default mode	brief_37	Null	0.0330616
default mode	brief_38	Experimental	0.00165817
default mode	brief_38	Null	0.0298674
default mode	brief_39	Experimental	0.00534823
default mode	brief_39	Null	0.0314117
default mode	brief_4	Experimental	0.0651331
default mode	brief_4	Null	0.0355388
default mode	brief_40	Experimental	0.141472
default mode	brief_40	Null	0.0241991
default mode	brief_41	Experimental	8.00141e-05
default mode	brief_41	Null	0.0270917
default mode	brief_42	Experimental	0.201302
default mode	brief_42	Null	0.0322071
default mode	brief_43	Experimental	0.0438294
default mode	brief_43	Null	0.0268
default mode	brief_44	Experimental	0.000146065
default mode	brief_44	Null	0.0336487
default mode	brief_45	Experimental	0.00337974
default mode	brief_45	Null	0.0357944
default mode	brief_46	Experimental	0.113652
default mode	brief_46	Null	0.030204
default mode	brief_47	Experimental	0.171649
default mode	brief_47	Null	0.0266224
default mode	brief_48	Experimental	0
default mode	brief_48	Null	0.0255278
default mode	brief_49	Experimental	0.000430566
default mode	brief_49	Null	0.0317894
default mode	brief_5	Experimental	0.1793
default mode	brief_5	Null	0.0345662
default mode	brief_50	Experimental	0.0342287
default mode	brief_50	Null	0.023167
default mode	brief_51	Experimental	0.0680383
default mode	brief_51	Null	0.0316677
default mode	brief_52	Experimental	0
default mode	brief_52	Null	0.0307278
default mode	brief_53	Experimental	0.00899564
default mode	brief_53	Null	0.0291284
default mode	brief_54	Experimental	0.0100915
default mode	brief_54	Null	0.0396756
default mode	brief_55	Experimental	0.0736047
default mode	brief_55	Null	0.0351566
default mode	brief_56	Experimental	0.0193348
default mode	brief_56	Null	0.0311067
default mode	brief_57	Experimental	0.146061
default mode	brief_57	Null	0.0316764
default mode	brief_58	Experimental	0.0118576
default mode	brief_58	Null	0.0359
default mode	brief_59	Experimental	0.0953384
default mode	brief_59	Null	0.0287183
default mode	brief_6	Experimental	0.0385998
default mode	brief_6	Null	0.0432581
default mode	brief_60	Experimental	0
default mode	brief_60	Null	0.0312985
default mode	brief_61	Experimental	0.00895494
default mode	brief_61	Null	0.0322896
default mode	brief_62	Experimental	0.058945
default mode	brief_62	Null	0.0278286
default mode	brief_63	Experimental	0.00808771
default mode	brief_63	Null	0.031394
default mode	brief_64	Experimental	9.91758e-05
default mode	brief_64	Null	0.037079
default mode	brief_65	Experimental	0.083863
default mode	brief_65	Null	0.0342305
default mode	brief_66	Experimental	0.03787
default mode	brief_66	Null	0.033124
default mode	brief_67	Experimental	0.0544894
default mode	brief_67	Null	0.0319221
default mode	brief_68	Experimental	0.0083151
default mode	brief_68	Null	0.0310452
default mode	brief_69	Experimental	0.0279058
default mode	brief_69	Null	0.0356149
default mode	brief_7	Experimental	0.00118091
default mode	brief_7	Null	0.0263302
default mode	brief_70	Experimental	0.0527101
default mode	brief_70	Null	0.0280933
default mode	brief_71	Experimental	0.000547892
default mode	brief_71	Null	0.0264663
default mode	brief_72	Experimental	0.105217
default mode	brief_72	Null	0.0201594
default mode	brief_73	Experimental	0.0212757
default mode	brief_73	Null	0.0380246
default mode	brief_74	Experimental	0.149527
default mode	brief_74	Null	0.0346139
default mode	brief_75	Experimental	0
default mode	brief_75	Null	0.0395928
default mode	brief_8	Experimental	0.00109296
default mode	brief_8	Null	0.0306126
default mode	brief_9	Experimental	0
default mode	brief_9	Null	0.0233808
default mode	bsi_1	Experimental	0.102517
default mode	bsi_1	Null	0.0287306
default mode	bsi_10	Experimental	0
default mode	bsi_10	Null	0.0244034
default mode	bsi_11	Experimental	0.00718793
default mode	bsi_11	Null	0.0292336
default mode	bsi_12	Experimental	0.0136161
default mode	bsi_12	Null	0.0311022
default mode	bsi_13	Experimental	0.100364
default mode	bsi_13	Null	0.0276662
default mode	bsi_14	Experimental	0
default mode	bsi_14	Null	0.0278257
default mode	bsi_15	Experimental	0.0128286
default mode	bsi_15	Null	0.0388698
default mode	bsi_16	Experimental	0
default mode	bsi_16	Null	0.0238971
default mode	bsi_17	Experimental	0
default mode	bsi_17	Null	0.0270773
default mode	bsi_18	Experimental	0
default mode	bsi_18	Null	0.0331191
default mode	bsi_19	Experimental	0.000516251
default mode	bsi_19	Null	0.0355992
default mode	bsi_2	Experimental	0
default mode	bsi_2	Null	0.0333236
default mode	bsi_20	Experimental	0.0711601
default mode	bsi_20	Null	0.0307125
default mode	bsi_21	Experimental	0
default mode	bsi_21	Null	0.0169006
default mode	bsi_22	Experimental	0
default mode	bsi_22	Null	0.0495115
default mode	bsi_23	Experimental	0.0476591
default mode	bsi_23	Null	0.0249909
default mode	bsi_24	Experimental	0
default mode	bsi_24	Null	0.0274157
default mode	bsi_25	Experimental	0.0357327
default mode	bsi_25	Null	0.030409
default mode	bsi_26	Experimental	0.00131712
default mode	bsi_26	Null	0.0414194
default mode	bsi_27	Experimental	3.71607e-05
default mode	bsi_27	Null	0.0276438
default mode	bsi_28	Experimental	0.00239384
default mode	bsi_28	Null	0.0317538
default mode	bsi_29	Experimental	0.042792
default mode	bsi_29	Null	0.0404972
default mode	bsi_3	Experimental	0.00513638
default mode	bsi_3	Null	0.0265272
default mode	bsi_30	Experimental	7.97012e-05
default mode	bsi_30	Null	0.0310207
default mode	bsi_31	Experimental	0.001388
default mode	bsi_31	Null	0.0310167
default mode	bsi_32	Experimental	0.00936118
default mode	bsi_32	Null	0.0434881
default mode	bsi_33	Experimental	0.0315621
default mode	bsi_33	Null	0.0303537
default mode	bsi_34	Experimental	0
default mode	bsi_34	Null	0.0310566
default mode	bsi_35	Experimental	2.36511e-05
default mode	bsi_35	Null	0.0349588
default mode	bsi_36	Experimental	0.00873293
default mode	bsi_36	Null	0.0368564
default mode	bsi_37	Experimental	0.0598654
default mode	bsi_37	Null	0.0399064
default mode	bsi_38	Experimental	0.0527643
default mode	bsi_38	Null	0.0308534
default mode	bsi_4	Experimental	0.00180772
default mode	bsi_4	Null	0.0319183
default mode	bsi_41	Experimental	0
default mode	bsi_41	Null	0.0301561
default mode	bsi_42	Experimental	0.123119
default mode	bsi_42	Null	0.030649
default mode	bsi_43	Experimental	0.000168596
default mode	bsi_43	Null	0.0332361
default mode	bsi_44	Experimental	0
default mode	bsi_44	Null	0.026756
default mode	bsi_45	Experimental	2.91739e-05
default mode	bsi_45	Null	0.0264786
default mode	bsi_46	Experimental	0.029887
default mode	bsi_46	Null	0.0314516
default mode	bsi_47	Experimental	0.117303
default mode	bsi_47	Null	0.0347689
default mode	bsi_48	Experimental	0.000567046
default mode	bsi_48	Null	0.0262787
default mode	bsi_49	Experimental	0.0344467
default mode	bsi_49	Null	0.0384049
default mode	bsi_5	Experimental	0
default mode	bsi_5	Null	0.0364242
default mode	bsi_50	Experimental	0
default mode	bsi_50	Null	0.0323025
default mode	bsi_51	Experimental	0.00122157
default mode	bsi_51	Null	0.0326241
default mode	bsi_52	Experimental	0
default mode	bsi_52	Null	0.0285333
default mode	bsi_53	Experimental	0
default mode	bsi_53	Null	0.042731
default mode	bsi_6	Experimental	0.135278
default mode	bsi_6	Null	0.0259178
default mode	bsi_7	Experimental	0.012274
default mode	bsi_7	Null	0.0277973
default mode	bsi_8	Experimental	0
default mode	bsi_8	Null	0.034134
default mode	iri_1	Experimental	0.165593
default mode	iri_1	Null	0.026934
default mode	iri_10	Experimental	0.0647719
default mode	iri_10	Null	0.0376587
default mode	iri_11	Experimental	0.0580792
default mode	iri_11	Null	0.0260588
default mode	iri_12	Experimental	0.0231045
default mode	iri_12	Null	0.0281796
default mode	iri_13	Experimental	0.00251226
default mode	iri_13	Null	0.0381093
default mode	iri_14	Experimental	0
default mode	iri_14	Null	0.0292571
default mode	iri_15	Experimental	0.000536131
default mode	iri_15	Null	0.0302755
default mode	iri_16	Experimental	0.124354
default mode	iri_16	Null	0.0354198
default mode	iri_17	Experimental	0.0276954
default mode	iri_17	Null	0.0294303
default mode	iri_18	Experimental	0.000223525
default mode	iri_18	Null	0.0309378
default mode	iri_19	Experimental	0.142787
default mode	iri_19	Null	0.0391674
default mode	iri_2	Experimental	0.00153528
default mode	iri_2	Null	0.0308228
default mode	iri_20	Experimental	0.0346485
default mode	iri_20	Null	0.0327082
default mode	iri_21	Experimental	0.000728233
default mode	iri_21	Null	0.0307835
default mode	iri_22	Experimental	0.00142729
default mode	iri_22	Null	0.0302463
default mode	iri_23	Experimental	0.0169802
default mode	iri_23	Null	0.0355285
default mode	iri_24	Experimental	0.0108199
default mode	iri_24	Null	0.0301794
default mode	iri_25	Experimental	0
default mode	iri_25	Null	0.0383588
default mode	iri_26	Experimental	0.058627
default mode	iri_26	Null	0.0356774
default mode	iri_27	Experimental	0.159491
default mode	iri_27	Null	0.0256874
default mode	iri_28	Experimental	0.00297872
default mode	iri_28	Null	0.0276215
default mode	iri_3	Experimental	0.0632117
default mode	iri_3	Null	0.0278494
default mode	iri_4	Experimental	0.000112688
default mode	iri_4	Null	0.0310078
default mode	iri_5	Experimental	0.0701784
default mode	iri_5	Null	0.0244675
default mode	iri_6	Experimental	0.106159
default mode	iri_6	Null	0.0264683
default mode	iri_7	Experimental	0
default mode	iri_7	Null	0.0260451
default mode	iri_8	Experimental	0.0811766
default mode	iri_8	Null	0.0254332
default mode	iri_9	Experimental	0.0601246
default mode	iri_9	Null	0.0273641
default mode	panas_1	Experimental	0
default mode	panas_1	Null	0.0248153
default mode	panas_10	Experimental	0.000804725
default mode	panas_10	Null	0.0361328
default mode	panas_11	Experimental	0.0559
default mode	panas_11	Null	0.0362887
default mode	panas_12	Experimental	0
default mode	panas_12	Null	0.0334319
default mode	panas_13	Experimental	0.00802172
default mode	panas_13	Null	0.0300049
default mode	panas_14	Experimental	0.0568643
default mode	panas_14	Null	0.037052
default mode	panas_15	Experimental	0
default mode	panas_15	Null	0.0318815
default mode	panas_16	Experimental	0
default mode	panas_16	Null	0.0240126
default mode	panas_17	Experimental	0.138289
default mode	panas_17	Null	0.0334636
default mode	panas_18	Experimental	0
default mode	panas_18	Null	0.024968
default mode	panas_19	Experimental	0.0682677
default mode	panas_19	Null	0.0376605
default mode	panas_2	Experimental	0.0261284
default mode	panas_2	Null	0.0289662
default mode	panas_20	Experimental	0.137249
default mode	panas_20	Null	0.0335472
default mode	panas_21	Experimental	0.112655
default mode	panas_21	Null	0.0286927
default mode	panas_22	Experimental	0
default mode	panas_22	Null	0.0315734
default mode	panas_23	Experimental	0.0250567
default mode	panas_23	Null	0.0384045
default mode	panas_24	Experimental	0
default mode	panas_24	Null	0.032566
default mode	panas_25	Experimental	0.0216716
default mode	panas_25	Null	0.037873
default mode	panas_26	Experimental	0.0191271
default mode	panas_26	Null	0.034619
default mode	panas_27	Experimental	0.00708587
default mode	panas_27	Null	0.0278706
default mode	panas_28	Experimental	0.0590548
default mode	panas_28	Null	0.0279926
default mode	panas_29	Experimental	0.000224051
default mode	panas_29	Null	0.0358933
default mode	panas_3	Experimental	0.0288094
default mode	panas_3	Null	0.0458135
default mode	panas_30	Experimental	0.00607388
default mode	panas_30	Null	0.0304067
default mode	panas_31	Experimental	0.0262921
default mode	panas_31	Null	0.0270422
default mode	panas_32	Experimental	0
default mode	panas_32	Null	0.027603
default mode	panas_33	Experimental	0
default mode	panas_33	Null	0.0343048
default mode	panas_34	Experimental	3.47803e-05
default mode	panas_34	Null	0.0376086
default mode	panas_35	Experimental	0
default mode	panas_35	Null	0.0257693
default mode	panas_36	Experimental	0.0817532
default mode	panas_36	Null	0.0270138
default mode	panas_37	Experimental	0.00122713
default mode	panas_37	Null	0.0307128
default mode	panas_38	Experimental	0.109026
default mode	panas_38	Null	0.0219823
default mode	panas_39	Experimental	0.0113461
default mode	panas_39	Null	0.0337912
default mode	panas_4	Experimental	0.013325
default mode	panas_4	Null	0.0367502
default mode	panas_40	Experimental	0.00171069
default mode	panas_40	Null	0.0378478
default mode	panas_41	Experimental	0.0211525
default mode	panas_41	Null	0.0258789
default mode	panas_42	Experimental	0.000281633
default mode	panas_42	Null	0.02813
default mode	panas_43	Experimental	0
default mode	panas_43	Null	0.0374013
default mode	panas_44	Experimental	0
default mode	panas_44	Null	0.0329927
default mode	panas_45	Experimental	0.0341476
default mode	panas_45	Null	0.0280457
default mode	panas_46	Experimental	0
default mode	panas_46	Null	0.0304383
default mode	panas_47	Experimental	9.73322e-06
default mode	panas_47	Null	0.0362627
default mode	panas_48	Experimental	0.028128
default mode	panas_48	Null	0.0301827
default mode	panas_49	Experimental	0.024119
default mode	panas_49	Null	0.0337322
default mode	panas_5	Experimental	0.115777
default mode	panas_5	Null	0.0269546
default mode	panas_50	Experimental	0.0106458
default mode	panas_50	Null	0.0376996
default mode	panas_51	Experimental	0
default mode	panas_51	Null	0.0289647
default mode	panas_52	Experimental	0.0117157
default mode	panas_52	Null	0.0359666
default mode	panas_53	Experimental	0
default mode	panas_53	Null	0.0187417
default mode	panas_54	Experimental	0.0636228
default mode	panas_54	Null	0.0275889
default mode	panas_55	Experimental	0.000369818
default mode	panas_55	Null	0.0256383
default mode	panas_56	Experimental	0.0134503
default mode	panas_56	Null	0.0330903
default mode	panas_57	Experimental	0.00411576
default mode	panas_57	Null	0.0359372
default mode	panas_58	Experimental	0.00166227
default mode	panas_58	Null	0.0298224
default mode	panas_59	Experimental	0.003129
default mode	panas_59	Null	0.0351817
default mode	panas_6	Experimental	0.0030113
default mode	panas_6	Null	0.0299783
default mode	panas_60	Experimental	0
default mode	panas_60	Null	0.0307461
default mode	panas_7	Experimental	0.0610317
default mode	panas_7	Null	0.0377704
default mode	panas_8	Experimental	0.0177131
default mode	panas_8	Null	0.0290948
default mode	panas_9	Experimental	0
default mode	panas_9	Null	0.0337604
default mode	psqi_1	Experimental	0.0958651
default mode	psqi_1	Null	0.024205
default mode	psqi_10	Experimental	0.0323024
default mode	psqi_10	Null	0.0291724
default mode	psqi_11	Experimental	0.0132644
default mode	psqi_11	Null	0.0282064
default mode	psqi_12	Experimental	0.102898
default mode	psqi_12	Null	0.0260943
default mode	psqi_13	Experimental	1.22375e-06
default mode	psqi_13	Null	0.0367167
default mode	psqi_14	Experimental	0.0914823
default mode	psqi_14	Null	0.0365949
default mode	psqi_2	Experimental	0.142514
default mode	psqi_2	Null	0.033194
default mode	psqi_3	Experimental	0.0805457
default mode	psqi_3	Null	0.0318997
default mode	psqi_4	Experimental	0.0246998
default mode	psqi_4	Null	0.0394765
default mode	psqi_5	Experimental	0.122362
default mode	psqi_5	Null	0.0318183
default mode	psqi_6	Experimental	0.023115
default mode	psqi_6	Null	0.035283
default mode	psqi_7	Experimental	0
default mode	psqi_7	Null	0.0287137
default mode	psqi_8	Experimental	0.0210847
default mode	psqi_8	Null	0.0293103
default mode	psqi_9	Experimental	0.00384307
default mode	psqi_9	Null	0.0295721
default mode	pss_1	Experimental	0.0361653
default mode	pss_1	Null	0.0242499
default mode	pss_10	Experimental	0
default mode	pss_10	Null	0.0278513
default mode	pss_11	Experimental	0.0260462
default mode	pss_11	Null	0.0271728
default mode	pss_12	Experimental	0.139699
default mode	pss_12	Null	0.030757
default mode	pss_13	Experimental	0.00452387
default mode	pss_13	Null	0.035086
default mode	pss_14	Experimental	0.00457485
default mode	pss_14	Null	0.0362866
default mode	pss_2	Experimental	0.00818779
default mode	pss_2	Null	0.0458781
default mode	pss_3	Experimental	0.151516
default mode	pss_3	Null	0.0367796
default mode	pss_4	Experimental	0.0271322
default mode	pss_4	Null	0.034902
default mode	pss_5	Experimental	0.0115611
default mode	pss_5	Null	0.0259539
default mode	pss_6	Experimental	0.0347899
default mode	pss_6	Null	0.0268841
default mode	pss_7	Experimental	0.00932186
default mode	pss_7	Null	0.0330979
default mode	pss_8	Experimental	4.63402e-06
default mode	pss_8	Null	0.0236852
default mode	pss_9	Experimental	0.0493128
default mode	pss_9	Null	0.0396104
frontoparietal	atq_1	Experimental	0.0345782
frontoparietal	atq_1	Null	0.0365001
frontoparietal	atq_10	Experimental	0.0444184
frontoparietal	atq_10	Null	0.0247695
frontoparietal	atq_11	Experimental	0.0722617
frontoparietal	atq_11	Null	0.0343805
frontoparietal	atq_12	Experimental	0.0384729
frontoparietal	atq_12	Null	0.0364943
frontoparietal	atq_13	Experimental	0.00102807
frontoparietal	atq_13	Null	0.0262388
frontoparietal	atq_14	Experimental	0
frontoparietal	atq_14	Null	0.0311907
frontoparietal	atq_15	Experimental	0.0623459
frontoparietal	atq_15	Null	0.0301719
frontoparietal	atq_16	Experimental	0.012815
frontoparietal	atq_16	Null	0.0320653
frontoparietal	atq_17	Experimental	0.0627781
frontoparietal	atq_17	Null	0.0285631
frontoparietal	atq_18	Experimental	0.0130099
frontoparietal	atq_18	Null	0.0267975
frontoparietal	atq_19	Experimental	1.64107e-05
frontoparietal	atq_19	Null	0.0290109
frontoparietal	atq_2	Experimental	0.0265135
frontoparietal	atq_2	Null	0.0273904
frontoparietal	atq_20	Experimental	0.0361552
frontoparietal	atq_20	Null	0.0350326
frontoparietal	atq_21	Experimental	3.99534e-05
frontoparietal	atq_21	Null	0.0363812
frontoparietal	atq_22	Experimental	0.000132142
frontoparietal	atq_22	Null	0.036623
frontoparietal	atq_23	Experimental	0.11108
frontoparietal	atq_23	Null	0.0344808
frontoparietal	atq_24	Experimental	0.105229
frontoparietal	atq_24	Null	0.0281012
frontoparietal	atq_25	Experimental	0.00317444
frontoparietal	atq_25	Null	0.0335616
frontoparietal	atq_26	Experimental	0
frontoparietal	atq_26	Null	0.0282903
frontoparietal	atq_27	Experimental	0.0445388
frontoparietal	atq_27	Null	0.023001
frontoparietal	atq_28	Experimental	0
frontoparietal	atq_28	Null	0.0282333
frontoparietal	atq_29	Experimental	0.0890229
frontoparietal	atq_29	Null	0.0477486
frontoparietal	atq_3	Experimental	0.0692777
frontoparietal	atq_3	Null	0.0294937
frontoparietal	atq_30	Experimental	0.12876
frontoparietal	atq_30	Null	0.0295786
frontoparietal	atq_31	Experimental	0.059378
frontoparietal	atq_31	Null	0.0318597
frontoparietal	atq_32	Experimental	0.0031941
frontoparietal	atq_32	Null	0.0333842
frontoparietal	atq_33	Experimental	0.102473
frontoparietal	atq_33	Null	0.0258816
frontoparietal	atq_34	Experimental	0
frontoparietal	atq_34	Null	0.028936
frontoparietal	atq_35	Experimental	0.0399297
frontoparietal	atq_35	Null	0.0425176
frontoparietal	atq_36	Experimental	0.0130381
frontoparietal	atq_36	Null	0.0346532
frontoparietal	atq_37	Experimental	0
frontoparietal	atq_37	Null	0.0238483
frontoparietal	atq_38	Experimental	0.0018217
frontoparietal	atq_38	Null	0.0318444
frontoparietal	atq_39	Experimental	0.0806892
frontoparietal	atq_39	Null	0.0282226
frontoparietal	atq_4	Experimental	0.0053472
frontoparietal	atq_4	Null	0.0311897
frontoparietal	atq_40	Experimental	1.60942e-05
frontoparietal	atq_40	Null	0.0439133
frontoparietal	atq_41	Experimental	0.0653076
frontoparietal	atq_41	Null	0.0335135
frontoparietal	atq_42	Experimental	0
frontoparietal	atq_42	Null	0.031528
frontoparietal	atq_43	Experimental	0.00571343
frontoparietal	atq_43	Null	0.042177
frontoparietal	atq_44	Experimental	0.0796545
frontoparietal	atq_44	Null	0.0253906
frontoparietal	atq_45	Experimental	0.220988
frontoparietal	atq_45	Null	0.0346076
frontoparietal	atq_46	Experimental	0.0347507
frontoparietal	atq_46	Null	0.0326669
frontoparietal	atq_47	Experimental	0
frontoparietal	atq_47	Null	0.0340159
frontoparietal	atq_48	Experimental	0.0045373
frontoparietal	atq_48	Null	0.0308913
frontoparietal	atq_49	Experimental	0.0315336
frontoparietal	atq_49	Null	0.024931
frontoparietal	atq_5	Experimental	8.74326e-06
frontoparietal	atq_5	Null	0.0317664
frontoparietal	atq_50	Experimental	0.127022
[truncated: 4,997 more rows]

## Sheet: Supplementary Table 6
network	subscore	group	pred_power
cerebellum	ATQ_Activation	Experimental	0.0109213
cerebellum	ATQ_Activation	Null	0.0266778
cerebellum	ATQ_Affective Sensitivity	Experimental	0.0641119
cerebellum	ATQ_Affective Sensitivity	Null	0.0336231
cerebellum	ATQ_Associative Sensitivity	Experimental	0.00423444
cerebellum	ATQ_Associative Sensitivity	Null	0.0324147
cerebellum	ATQ_Attention	Experimental	0
cerebellum	ATQ_Attention	Null	0.0232026
cerebellum	ATQ_Discomfort	Experimental	0.148152
cerebellum	ATQ_Discomfort	Null	0.0312862
cerebellum	ATQ_Fear	Experimental	0.135278
cerebellum	ATQ_Fear	Null	0.0345812
cerebellum	ATQ_Frustration	Experimental	0
cerebellum	ATQ_Frustration	Null	0.0327856
cerebellum	ATQ_Inhibition	Experimental	0.000685665
cerebellum	ATQ_Inhibition	Null	0.0338641
cerebellum	ATQ_Neutral Sensitivity	Experimental	0.0220219
cerebellum	ATQ_Neutral Sensitivity	Null	0.03057
cerebellum	ATQ_Pleasure	Experimental	0.0717729
cerebellum	ATQ_Pleasure	Null	0.0276935
cerebellum	ATQ_Positive Affect	Experimental	0.00803152
cerebellum	ATQ_Positive Affect	Null	0.0429928
cerebellum	ATQ_Sadness	Experimental	0.0656341
cerebellum	ATQ_Sadness	Null	0.0291475
cerebellum	ATQ_Sociability	Experimental	0.00133653
cerebellum	ATQ_Sociability	Null	0.0293608
cerebellum	BRIEF-A_Emotional Control	Experimental	0.149371
cerebellum	BRIEF-A_Emotional Control	Null	0.0295594
cerebellum	BRIEF-A_Infrequency	Experimental	0.16606
cerebellum	BRIEF-A_Infrequency	Null	0.026882
cerebellum	BRIEF-A_Inhibit	Experimental	0.247442
cerebellum	BRIEF-A_Inhibit	Null	0.0314828
cerebellum	BRIEF-A_Initiate	Experimental	0.152557
cerebellum	BRIEF-A_Initiate	Null	0.0354056
cerebellum	BRIEF-A_Org. of Materials	Experimental	0.0663615
cerebellum	BRIEF-A_Org. of Materials	Null	0.0266541
cerebellum	BRIEF-A_Plan/Organize	Experimental	0.00296495
cerebellum	BRIEF-A_Plan/Organize	Null	0.0338453
cerebellum	BRIEF-A_Self-Monitor	Experimental	0.0353354
cerebellum	BRIEF-A_Self-Monitor	Null	0.0307058
cerebellum	BRIEF-A_Shift	Experimental	0.0848908
cerebellum	BRIEF-A_Shift	Null	0.029586
cerebellum	BRIEF-A_Task Monitor	Experimental	0.0454488
cerebellum	BRIEF-A_Task Monitor	Null	0.0368048
cerebellum	BRIEF-A_Working Memory	Experimental	0.0518244
cerebellum	BRIEF-A_Working Memory	Null	0.0256055
cerebellum	BSI_Additional	Experimental	0.127225
cerebellum	BSI_Additional	Null	0.0313224
cerebellum	BSI_Anxiety	Experimental	0.0540807
cerebellum	BSI_Anxiety	Null	0.0227934
cerebellum	BSI_Depression	Experimental	0.13095
cerebellum	BSI_Depression	Null	0.0328058
cerebellum	BSI_Hostility	Experimental	0.199049
cerebellum	BSI_Hostility	Null	0.0302441
cerebellum	BSI_Interpersonal Sensitivity	Experimental	0.0474209
cerebellum	BSI_Interpersonal Sensitivity	Null	0.0350869
cerebellum	BSI_Obsession-Compulsion	Experimental	0.0596126
cerebellum	BSI_Obsession-Compulsion	Null	0.0314418
cerebellum	BSI_Paranoid Ideation	Experimental	0.000831073
cerebellum	BSI_Paranoid Ideation	Null	0.0281676
cerebellum	BSI_Phobic Anxiety	Experimental	0.0599632
cerebellum	BSI_Phobic Anxiety	Null	0.0333643
cerebellum	BSI_Psychoticism	Experimental	0.0752029
cerebellum	BSI_Psychoticism	Null	0.0259378
cerebellum	BSI_Somatization	Experimental	0.0519675
cerebellum	BSI_Somatization	Null	0.030385
cerebellum	IRI_Empathetic Concern	Experimental	0.154498
cerebellum	IRI_Empathetic Concern	Null	0.0321869
cerebellum	IRI_Fantasy	Experimental	0.0940355
cerebellum	IRI_Fantasy	Null	0.0327137
cerebellum	IRI_Personal Distress	Experimental	0.162128
cerebellum	IRI_Personal Distress	Null	0.0353836
cerebellum	IRI_Perspective Taking	Experimental	0
cerebellum	IRI_Perspective Taking	Null	0.023682
cerebellum	PANAS-X_Attentiveness	Experimental	0.00529683
cerebellum	PANAS-X_Attentiveness	Null	0.0411396
cerebellum	PANAS-X_Fatigue	Experimental	0.0486637
cerebellum	PANAS-X_Fatigue	Null	0.0370467
cerebellum	PANAS-X_Fear	Experimental	0.0394821
cerebellum	PANAS-X_Fear	Null	0.0328802
cerebellum	PANAS-X_Guilt	Experimental	0.20668
cerebellum	PANAS-X_Guilt	Null	0.0261449
cerebellum	PANAS-X_Hostility	Experimental	0.21135
cerebellum	PANAS-X_Hostility	Null	0.0381245
cerebellum	PANAS-X_Joviality	Experimental	0.0269395
cerebellum	PANAS-X_Joviality	Null	0.0272225
cerebellum	PANAS-X_Negative Affect	Experimental	0.153088
cerebellum	PANAS-X_Negative Affect	Null	0.0273821
cerebellum	PANAS-X_Positive Affect	Experimental	0.0489208
cerebellum	PANAS-X_Positive Affect	Null	0.0280061
cerebellum	PANAS-X_Sadness	Experimental	0.161368
cerebellum	PANAS-X_Sadness	Null	0.0318881
cerebellum	PANAS-X_Self-Assurance	Experimental	0.0718435
cerebellum	PANAS-X_Self-Assurance	Null	0.0322186
cerebellum	PANAS-X_Serenity	Experimental	0.147211
cerebellum	PANAS-X_Serenity	Null	0.0381906
cerebellum	PANAS-X_Shyness	Experimental	0.00338182
cerebellum	PANAS-X_Shyness	Null	0.0199848
cerebellum	PANAS-X_Surprise	Experimental	0.0260591
cerebellum	PANAS-X_Surprise	Null	0.0258906
cerebellum	PSQI_Sleep	Experimental	0.125774
cerebellum	PSQI_Sleep	Null	0.0281732
cerebellum	PSS_Stress	Experimental	0.000334785
cerebellum	PSS_Stress	Null	0.027218
default mode	ATQ_Activation	Experimental	0.169021
default mode	ATQ_Activation	Null	0.0288376
default mode	ATQ_Affective Sensitivity	Experimental	0.0297447
default mode	ATQ_Affective Sensitivity	Null	0.03042
default mode	ATQ_Associative Sensitivity	Experimental	0.0231881
default mode	ATQ_Associative Sensitivity	Null	0.0212905
default mode	ATQ_Attention	Experimental	0.156033
default mode	ATQ_Attention	Null	0.0318449
default mode	ATQ_Discomfort	Experimental	0.163061
default mode	ATQ_Discomfort	Null	0.0301207
default mode	ATQ_Fear	Experimental	0.152485
default mode	ATQ_Fear	Null	0.0356442
default mode	ATQ_Frustration	Experimental	0.021725
default mode	ATQ_Frustration	Null	0.0274249
default mode	ATQ_Inhibition	Experimental	0.000100989
default mode	ATQ_Inhibition	Null	0.03131
default mode	ATQ_Neutral Sensitivity	Experimental	0.107373
default mode	ATQ_Neutral Sensitivity	Null	0.0365948
default mode	ATQ_Pleasure	Experimental	0.0574984
default mode	ATQ_Pleasure	Null	0.0293259
default mode	ATQ_Positive Affect	Experimental	0
default mode	ATQ_Positive Affect	Null	0.0309624
default mode	ATQ_Sadness	Experimental	0.00804718
default mode	ATQ_Sadness	Null	0.0405221
default mode	ATQ_Sociability	Experimental	1.60062e-05
default mode	ATQ_Sociability	Null	0.0330595
default mode	BRIEF-A_Emotional Control	Experimental	0.123015
default mode	BRIEF-A_Emotional Control	Null	0.0353612
default mode	BRIEF-A_Infrequency	Experimental	0.014006
default mode	BRIEF-A_Infrequency	Null	0.0240728
default mode	BRIEF-A_Inhibit	Experimental	0.0932048
default mode	BRIEF-A_Inhibit	Null	0.0314712
default mode	BRIEF-A_Initiate	Experimental	0.00771518
default mode	BRIEF-A_Initiate	Null	0.0328031
default mode	BRIEF-A_Org. of Materials	Experimental	0.0190451
default mode	BRIEF-A_Org. of Materials	Null	0.027464
default mode	BRIEF-A_Plan/Organize	Experimental	0.0234916
default mode	BRIEF-A_Plan/Organize	Null	0.0300021
default mode	BRIEF-A_Self-Monitor	Experimental	0.0386172
default mode	BRIEF-A_Self-Monitor	Null	0.0338931
default mode	BRIEF-A_Shift	Experimental	0.0035247
default mode	BRIEF-A_Shift	Null	0.0306813
default mode	BRIEF-A_Task Monitor	Experimental	0
default mode	BRIEF-A_Task Monitor	Null	0.0285664
default mode	BRIEF-A_Working Memory	Experimental	0.0500051
default mode	BRIEF-A_Working Memory	Null	0.0240374
default mode	BSI_Additional	Experimental	5.42599e-05
default mode	BSI_Additional	Null	0.0306395
default mode	BSI_Anxiety	Experimental	0.0530494
default mode	BSI_Anxiety	Null	0.0301729
default mode	BSI_Depression	Experimental	0
default mode	BSI_Depression	Null	0.0345134
default mode	BSI_Hostility	Experimental	0.0736239
default mode	BSI_Hostility	Null	0.0318197
default mode	BSI_Interpersonal Sensitivity	Experimental	0.000540635
default mode	BSI_Interpersonal Sensitivity	Null	0.0337142
default mode	BSI_Obsession-Compulsion	Experimental	0.00020187
default mode	BSI_Obsession-Compulsion	Null	0.0277432
default mode	BSI_Paranoid Ideation	Experimental	0
default mode	BSI_Paranoid Ideation	Null	0.0216185
default mode	BSI_Phobic Anxiety	Experimental	0.010168
default mode	BSI_Phobic Anxiety	Null	0.0305805
default mode	BSI_Psychoticism	Experimental	0
default mode	BSI_Psychoticism	Null	0.0326595
default mode	BSI_Somatization	Experimental	7.19945e-05
default mode	BSI_Somatization	Null	0.0245373
default mode	IRI_Empathetic Concern	Experimental	0.000795824
default mode	IRI_Empathetic Concern	Null	0.0323857
default mode	IRI_Fantasy	Experimental	0.18893
default mode	IRI_Fantasy	Null	0.0233236
default mode	IRI_Personal Distress	Experimental	0.000756452
default mode	IRI_Personal Distress	Null	0.0337132
default mode	IRI_Perspective Taking	Experimental	0
default mode	IRI_Perspective Taking	Null	0.0337149
default mode	PANAS-X_Attentiveness	Experimental	0.000647755
default mode	PANAS-X_Attentiveness	Null	0.0278811
default mode	PANAS-X_Fatigue	Experimental	0.10052
default mode	PANAS-X_Fatigue	Null	0.0346283
default mode	PANAS-X_Fear	Experimental	0
default mode	PANAS-X_Fear	Null	0.0225178
default mode	PANAS-X_Guilt	Experimental	0
default mode	PANAS-X_Guilt	Null	0.023617
default mode	PANAS-X_Hostility	Experimental	0.00138512
default mode	PANAS-X_Hostility	Null	0.0348526
default mode	PANAS-X_Joviality	Experimental	0
default mode	PANAS-X_Joviality	Null	0.033054
default mode	PANAS-X_Negative Affect	Experimental	0.00107202
default mode	PANAS-X_Negative Affect	Null	0.0345133
default mode	PANAS-X_Positive Affect	Experimental	0.00172455
default mode	PANAS-X_Positive Affect	Null	0.0346564
default mode	PANAS-X_Sadness	Experimental	0
default mode	PANAS-X_Sadness	Null	0.0309723
default mode	PANAS-X_Self-Assurance	Experimental	0.0547739
default mode	PANAS-X_Self-Assurance	Null	0.0279013
default mode	PANAS-X_Serenity	Experimental	0.0018343
default mode	PANAS-X_Serenity	Null	0.0248259
default mode	PANAS-X_Shyness	Experimental	0.000743638
default mode	PANAS-X_Shyness	Null	0.0319827
default mode	PANAS-X_Surprise	Experimental	0.118461
default mode	PANAS-X_Surprise	Null	0.0316103
default mode	PSQI_Sleep	Experimental	0.0762451
default mode	PSQI_Sleep	Null	0.0299112
default mode	PSS_Stress	Experimental	0.15261
default mode	PSS_Stress	Null	0.0325863
frontoparietal	ATQ_Activation	Experimental	0
frontoparietal	ATQ_Activation	Null	0.0296496
frontoparietal	ATQ_Affective Sensitivity	Experimental	0.0411609
frontoparietal	ATQ_Affective Sensitivity	Null	0.0337448
frontoparietal	ATQ_Associative Sensitivity	Experimental	0.0246109
frontoparietal	ATQ_Associative Sensitivity	Null	0.0322979
frontoparietal	ATQ_Attention	Experimental	0.0451727
frontoparietal	ATQ_Attention	Null	0.026513
frontoparietal	ATQ_Discomfort	Experimental	0
frontoparietal	ATQ_Discomfort	Null	0.0297672
frontoparietal	ATQ_Fear	Experimental	0.00401334
frontoparietal	ATQ_Fear	Null	0.0242108
frontoparietal	ATQ_Frustration	Experimental	0
frontoparietal	ATQ_Frustration	Null	0.0268848
frontoparietal	ATQ_Inhibition	Experimental	0.0469452
frontoparietal	ATQ_Inhibition	Null	0.0385376
frontoparietal	ATQ_Neutral Sensitivity	Experimental	0.0496812
frontoparietal	ATQ_Neutral Sensitivity	Null	0.0300014
frontoparietal	ATQ_Pleasure	Experimental	0.016699
frontoparietal	ATQ_Pleasure	Null	0.0251592
frontoparietal	ATQ_Positive Affect	Experimental	0
frontoparietal	ATQ_Positive Affect	Null	0.0363571
frontoparietal	ATQ_Sadness	Experimental	0.127469
frontoparietal	ATQ_Sadness	Null	0.0324968
frontoparietal	ATQ_Sociability	Experimental	0.031893
frontoparietal	ATQ_Sociability	Null	0.0303226
frontoparietal	BRIEF-A_Emotional Control	Experimental	0.116611
frontoparietal	BRIEF-A_Emotional Control	Null	0.0305243
frontoparietal	BRIEF-A_Infrequency	Experimental	0.0923848
frontoparietal	BRIEF-A_Infrequency	Null	0.0372217
frontoparietal	BRIEF-A_Inhibit	Experimental	0.0251825
frontoparietal	BRIEF-A_Inhibit	Null	0.0309565
frontoparietal	BRIEF-A_Initiate	Experimental	0.0464707
frontoparietal	BRIEF-A_Initiate	Null	0.0257042
frontoparietal	BRIEF-A_Org. of Materials	Experimental	0.00622127
frontoparietal	BRIEF-A_Org. of Materials	Null	0.0217376
frontoparietal	BRIEF-A_Plan/Organize	Experimental	0.0536514
frontoparietal	BRIEF-A_Plan/Organize	Null	0.0329725
frontoparietal	BRIEF-A_Self-Monitor	Experimental	0.0370668
frontoparietal	BRIEF-A_Self-Monitor	Null	0.037586
frontoparietal	BRIEF-A_Shift	Experimental	0.0178935
frontoparietal	BRIEF-A_Shift	Null	0.0209917
frontoparietal	BRIEF-A_Task Monitor	Experimental	0.00741823
frontoparietal	BRIEF-A_Task Monitor	Null	0.0354445
frontoparietal	BRIEF-A_Working Memory	Experimental	0.0477426
frontoparietal	BRIEF-A_Working Memory	Null	0.0313503
frontoparietal	BSI_Additional	Experimental	0.0250952
frontoparietal	BSI_Additional	Null	0.0253644
frontoparietal	BSI_Anxiety	Experimental	0.077638
frontoparietal	BSI_Anxiety	Null	0.022392
frontoparietal	BSI_Depression	Experimental	0.102167
frontoparietal	BSI_Depression	Null	0.0298534
frontoparietal	BSI_Hostility	Experimental	0.0479575
frontoparietal	BSI_Hostility	Null	0.0198308
frontoparietal	BSI_Interpersonal Sensitivity	Experimental	0.0140862
frontoparietal	BSI_Interpersonal Sensitivity	Null	0.0263619
frontoparietal	BSI_Obsession-Compulsion	Experimental	0.0487696
frontoparietal	BSI_Obsession-Compulsion	Null	0.0346575
frontoparietal	BSI_Paranoid Ideation	Experimental	0.000607097
frontoparietal	BSI_Paranoid Ideation	Null	0.0304338
frontoparietal	BSI_Phobic Anxiety	Experimental	0.00988442
frontoparietal	BSI_Phobic Anxiety	Null	0.0305651
frontoparietal	BSI_Psychoticism	Experimental	0.0490981
frontoparietal	BSI_Psychoticism	Null	0.0264566
frontoparietal	BSI_Somatization	Experimental	0.0062129
frontoparietal	BSI_Somatization	Null	0.0322375
frontoparietal	IRI_Empathetic Concern	Experimental	0.000728684
frontoparietal	IRI_Empathetic Concern	Null	0.0346526
frontoparietal	IRI_Fantasy	Experimental	0.0323654
frontoparietal	IRI_Fantasy	Null	0.0397925
frontoparietal	IRI_Personal Distress	Experimental	0.0936065
frontoparietal	IRI_Personal Distress	Null	0.0331083
frontoparietal	IRI_Perspective Taking	Experimental	0.0935379
frontoparietal	IRI_Perspective Taking	Null	0.0316642
frontoparietal	PANAS-X_Attentiveness	Experimental	0.000423015
frontoparietal	PANAS-X_Attentiveness	Null	0.0331709
frontoparietal	PANAS-X_Fatigue	Experimental	0.109706
frontoparietal	PANAS-X_Fatigue	Null	0.0301533
frontoparietal	PANAS-X_Fear	Experimental	0
frontoparietal	PANAS-X_Fear	Null	0.0311246
frontoparietal	PANAS-X_Guilt	Experimental	0.0799933
frontoparietal	PANAS-X_Guilt	Null	0.0359675
frontoparietal	PANAS-X_Hostility	Experimental	0.0531702
frontoparietal	PANAS-X_Hostility	Null	0.0335472
frontoparietal	PANAS-X_Joviality	Experimental	0.0419834
frontoparietal	PANAS-X_Joviality	Null	0.04146
frontoparietal	PANAS-X_Negative Affect	Experimental	0.00391548
frontoparietal	PANAS-X_Negative Affect	Null	0.0350526
frontoparietal	PANAS-X_Positive Affect	Experimental	0.00442976
frontoparietal	PANAS-X_Positive Affect	Null	0.0245117
frontoparietal	PANAS-X_Sadness	Experimental	0.0972486
frontoparietal	PANAS-X_Sadness	Null	0.0276856
frontoparietal	PANAS-X_Self-Assurance	Experimental	0.0611611
frontoparietal	PANAS-X_Self-Assurance	Null	0.0361709
frontoparietal	PANAS-X_Serenity	Experimental	0.0463446
frontoparietal	PANAS-X_Serenity	Null	0.0349452
frontoparietal	PANAS-X_Shyness	Experimental	0.000581184
frontoparietal	PANAS-X_Shyness	Null	0.0267368
frontoparietal	PANAS-X_Surprise	Experimental	0
frontoparietal	PANAS-X_Surprise	Null	0.0260513
frontoparietal	PSQI_Sleep	Experimental	0
frontoparietal	PSQI_Sleep	Null	0.0270955
frontoparietal	PSS_Stress	Experimental	0.0763372
frontoparietal	PSS_Stress	Null	0.0371056
medial frontal	ATQ_Activation	Experimental	0.0179565
medial frontal	ATQ_Activation	Null	0.0285333
medial frontal	ATQ_Affective Sensitivity	Experimental	0.144298
medial frontal	ATQ_Affective Sensitivity	Null	0.0374052
medial frontal	ATQ_Associative Sensitivity	Experimental	0.0222583
medial frontal	ATQ_Associative Sensitivity	Null	0.0342052
medial frontal	ATQ_Attention	Experimental	0.0315731
medial frontal	ATQ_Attention	Null	0.0394036
medial frontal	ATQ_Discomfort	Experimental	0
medial frontal	ATQ_Discomfort	Null	0.0236365
medial frontal	ATQ_Fear	Experimental	0.00704123
medial frontal	ATQ_Fear	Null	0.0253215
medial frontal	ATQ_Frustration	Experimental	0.0800427
medial frontal	ATQ_Frustration	Null	0.0291538
medial frontal	ATQ_Inhibition	Experimental	0.00388349
medial frontal	ATQ_Inhibition	Null	0.0365743
medial frontal	ATQ_Neutral Sensitivity	Experimental	0.0923612
medial frontal	ATQ_Neutral Sensitivity	Null	0.0305824
medial frontal	ATQ_Pleasure	Experimental	0.0939688
medial frontal	ATQ_Pleasure	Null	0.0344474
medial frontal	ATQ_Positive Affect	Experimental	0.0791148
medial frontal	ATQ_Positive Affect	Null	0.0328039
medial frontal	ATQ_Sadness	Experimental	0.066558
medial frontal	ATQ_Sadness	Null	0.0307124
medial frontal	ATQ_Sociability	Experimental	0.00920166
medial frontal	ATQ_Sociability	Null	0.0385451
medial frontal	BRIEF-A_Emotional Control	Experimental	0.214637
medial frontal	BRIEF-A_Emotional Control	Null	0.0234924
medial frontal	BRIEF-A_Infrequency	Experimental	0.0375792
medial frontal	BRIEF-A_Infrequency	Null	0.0339049
medial frontal	BRIEF-A_Inhibit	Experimental	0.00140993
medial frontal	BRIEF-A_Inhibit	Null	0.0258963
medial frontal	BRIEF-A_Initiate	Experimental	0.142979
medial frontal	BRIEF-A_Initiate	Null	0.0275736
medial frontal	BRIEF-A_Org. of Materials	Experimental	0.0264375
medial frontal	BRIEF-A_Org. of Materials	Null	0.0384938
medial frontal	BRIEF-A_Plan/Organize	Experimental	0.0327965
medial frontal	BRIEF-A_Plan/Organize	Null	0.0340471
medial frontal	BRIEF-A_Self-Monitor	Experimental	0
medial frontal	BRIEF-A_Self-Monitor	Null	0.0372627
medial frontal	BRIEF-A_Shift	Experimental	0.161926
medial frontal	BRIEF-A_Shift	Null	0.0259123
medial frontal	BRIEF-A_Task Monitor	Experimental	0.0178739
medial frontal	BRIEF-A_Task Monitor	Null	0.0229005
medial frontal	BRIEF-A_Working Memory	Experimental	0.0865427
medial frontal	BRIEF-A_Working Memory	Null	0.0292677
medial frontal	BSI_Additional	Experimental	0.210097
medial frontal	BSI_Additional	Null	0.0318635
medial frontal	BSI_Anxiety	Experimental	0.168104
medial frontal	BSI_Anxiety	Null	0.0274932
medial frontal	BSI_Depression	Experimental	0.309047
medial frontal	BSI_Depression	Null	0.0338611
medial frontal	BSI_Hostility	Experimental	0.0736334
medial frontal	BSI_Hostility	Null	0.0295544
medial frontal	BSI_Interpersonal Sensitivity	Experimental	0.249669
medial frontal	BSI_Interpersonal Sensitivity	Null	0.0317166
medial frontal	BSI_Obsession-Compulsion	Experimental	0.132145
medial frontal	BSI_Obsession-Compulsion	Null	0.0349647
medial frontal	BSI_Paranoid Ideation	Experimental	0.194694
medial frontal	BSI_Paranoid Ideation	Null	0.0338341
medial frontal	BSI_Phobic Anxiety	Experimental	0.208765
medial frontal	BSI_Phobic Anxiety	Null	0.0305977
medial frontal	BSI_Psychoticism	Experimental	0.198637
medial frontal	BSI_Psychoticism	Null	0.0318284
medial frontal	BSI_Somatization	Experimental	0.128995
medial frontal	BSI_Somatization	Null	0.0322632
medial frontal	IRI_Empathetic Concern	Experimental	0.157128
medial frontal	IRI_Empathetic Concern	Null	0.0385201
medial frontal	IRI_Fantasy	Experimental	0.0226015
medial frontal	IRI_Fantasy	Null	0.0342258
medial frontal	IRI_Personal Distress	Experimental	0.136629
medial frontal	IRI_Personal Distress	Null	0.033166
medial frontal	IRI_Perspective Taking	Experimental	0.0342294
medial frontal	IRI_Perspective Taking	Null	0.0273387
medial frontal	PANAS-X_Attentiveness	Experimental	0.163107
medial frontal	PANAS-X_Attentiveness	Null	0.0296545
medial frontal	PANAS-X_Fatigue	Experimental	0.0267422
medial frontal	PANAS-X_Fatigue	Null	0.0303438
medial frontal	PANAS-X_Fear	Experimental	0.170791
medial frontal	PANAS-X_Fear	Null	0.0322912
medial frontal	PANAS-X_Guilt	Experimental	0.18577
medial frontal	PANAS-X_Guilt	Null	0.0361121
medial frontal	PANAS-X_Hostility	Experimental	0.123322
medial frontal	PANAS-X_Hostility	Null	0.0379735
medial frontal	PANAS-X_Joviality	Experimental	0.0349963
medial frontal	PANAS-X_Joviality	Null	0.0354609
medial frontal	PANAS-X_Negative Affect	Experimental	0.157336
medial frontal	PANAS-X_Negative Affect	Null	0.0328838
medial frontal	PANAS-X_Positive Affect	Experimental	0.0583566
medial frontal	PANAS-X_Positive Affect	Null	0.0372323
medial frontal	PANAS-X_Sadness	Experimental	0.115271
medial frontal	PANAS-X_Sadness	Null	0.0290032
medial frontal	PANAS-X_Self-Assurance	Experimental	0.0406832
medial frontal	PANAS-X_Self-Assurance	Null	0.0358167
medial frontal	PANAS-X_Serenity	Experimental	0.00822168
medial frontal	PANAS-X_Serenity	Null	0.0308411
medial frontal	PANAS-X_Shyness	Experimental	0.100559
medial frontal	PANAS-X_Shyness	Null	0.0277459
medial frontal	PANAS-X_Surprise	Experimental	0.00434635
medial frontal	PANAS-X_Surprise	Null	0.028963
medial frontal	PSQI_Sleep	Experimental	0.187424
medial frontal	PSQI_Sleep	Null	0.0333336
medial frontal	PSS_Stress	Experimental	0.0965407
medial frontal	PSS_Stress	Null	0.0319777
motor cortex	ATQ_Activation	Experimental	0
motor cortex	ATQ_Activation	Null	0.0273181
motor cortex	ATQ_Affective Sensitivity	Experimental	0.0878598
motor cortex	ATQ_Affective Sensitivity	Null	0.0238949
motor cortex	ATQ_Associative Sensitivity	Experimental	0.0161819
motor cortex	ATQ_Associative Sensitivity	Null	0.0347623
motor cortex	ATQ_Attention	Experimental	0.0557189
motor cortex	ATQ_Attention	Null	0.0275119
motor cortex	ATQ_Discomfort	Experimental	0.147239
motor cortex	ATQ_Discomfort	Null	0.0325045
motor cortex	ATQ_Fear	Experimental	0.086423
motor cortex	ATQ_Fear	Null	0.0292029
motor cortex	ATQ_Frustration	Experimental	0
motor cortex	ATQ_Frustration	Null	0.0328415
motor cortex	ATQ_Inhibition	Experimental	0.00661862
motor cortex	ATQ_Inhibition	Null	0.0321299
motor cortex	ATQ_Neutral Sensitivity	Experimental	0.0151756
motor cortex	ATQ_Neutral Sensitivity	Null	0.0280793
motor cortex	ATQ_Pleasure	Experimental	0.0599805
motor cortex	ATQ_Pleasure	Null	0.0365317
motor cortex	ATQ_Positive Affect	Experimental	0.0765344
motor cortex	ATQ_Positive Affect	Null	0.0303525
motor cortex	ATQ_Sadness	Experimental	0.108604
motor cortex	ATQ_Sadness	Null	0.0370107
motor cortex	ATQ_Sociability	Experimental	0.00472039
motor cortex	ATQ_Sociability	Null	0.0269563
motor cortex	BRIEF-A_Emotional Control	Experimental	0.070707
motor cortex	BRIEF-A_Emotional Control	Null	0.0227495
motor cortex	BRIEF-A_Infrequency	Experimental	0.0490071
motor cortex	BRIEF-A_Infrequency	Null	0.03159
motor cortex	BRIEF-A_Inhibit	Experimental	0.0537061
motor cortex	BRIEF-A_Inhibit	Null	0.0351628
motor cortex	BRIEF-A_Initiate	Experimental	0.134129
motor cortex	BRIEF-A_Initiate	Null	0.0249182
motor cortex	BRIEF-A_Org. of Materials	Experimental	0.16276
motor cortex	BRIEF-A_Org. of Materials	Null	0.0270531
motor cortex	BRIEF-A_Plan/Organize	Experimental	0.064642
motor cortex	BRIEF-A_Plan/Organize	Null	0.0250109
motor cortex	BRIEF-A_Self-Monitor	Experimental	0
motor cortex	BRIEF-A_Self-Monitor	Null	0.0249896
motor cortex	BRIEF-A_Shift	Experimental	0.0603904
motor cortex	BRIEF-A_Shift	Null	0.023198
motor cortex	BRIEF-A_Task Monitor	Experimental	0.0788506
motor cortex	BRIEF-A_Task Monitor	Null	0.026848
motor cortex	BRIEF-A_Working Memory	Experimental	0.0187552
motor cortex	BRIEF-A_Working Memory	Null	0.0296212
motor cortex	BSI_Additional	Experimental	0.0895266
motor cortex	BSI_Additional	Null	0.0327511
motor cortex	BSI_Anxiety	Experimental	0.0604065
motor cortex	BSI_Anxiety	Null	0.0397748
motor cortex	BSI_Depression	Experimental	0.116406
motor cortex	BSI_Depression	Null	0.023317
motor cortex	BSI_Hostility	Experimental	0.0367628
motor cortex	BSI_Hostility	Null	0.0330293
motor cortex	BSI_Interpersonal Sensitivity	Experimental	0.121996
motor cortex	BSI_Interpersonal Sensitivity	Null	0.0242643
motor cortex	BSI_Obsession-Compulsion	Experimental	0.0582604
motor cortex	BSI_Obsession-Compulsion	Null	0.0250746
motor cortex	BSI_Paranoid Ideation	Experimental	0.0139747
motor cortex	BSI_Paranoid Ideation	Null	0.0299933
motor cortex	BSI_Phobic Anxiety	Experimental	0.0904869
motor cortex	BSI_Phobic Anxiety	Null	0.0193103
motor cortex	BSI_Psychoticism	Experimental	0.0968489
motor cortex	BSI_Psychoticism	Null	0.0332065
motor cortex	BSI_Somatization	Experimental	0.0743193
motor cortex	BSI_Somatization	Null	0.0335531
motor cortex	IRI_Empathetic Concern	Experimental	0
motor cortex	IRI_Empathetic Concern	Null	0.030238
motor cortex	IRI_Fantasy	Experimental	9.52221e-06
motor cortex	IRI_Fantasy	Null	0.0343866
motor cortex	IRI_Personal Distress	Experimental	0.0990835
motor cortex	IRI_Personal Distress	Null	0.0259077
motor cortex	IRI_Perspective Taking	Experimental	0
motor cortex	IRI_Perspective Taking	Null	0.0361592
motor cortex	PANAS-X_Attentiveness	Experimental	0.0630933
motor cortex	PANAS-X_Attentiveness	Null	0.0269679
motor cortex	PANAS-X_Fatigue	Experimental	0.0456636
motor cortex	PANAS-X_Fatigue	Null	0.0492046
motor cortex	PANAS-X_Fear	Experimental	0.0226436
motor cortex	PANAS-X_Fear	Null	0.031336
motor cortex	PANAS-X_Guilt	Experimental	0.045033
motor cortex	PANAS-X_Guilt	Null	0.0318517
motor cortex	PANAS-X_Hostility	Experimental	0.0688422
motor cortex	PANAS-X_Hostility	Null	0.0310235
motor cortex	PANAS-X_Joviality	Experimental	0.0527819
motor cortex	PANAS-X_Joviality	Null	0.0307273
motor cortex	PANAS-X_Negative Affect	Experimental	0.0467368
motor cortex	PANAS-X_Negative Affect	Null	0.0265585
motor cortex	PANAS-X_Positive Affect	Experimental	0.137608
motor cortex	PANAS-X_Positive Affect	Null	0.032947
motor cortex	PANAS-X_Sadness	Experimental	0.102389
motor cortex	PANAS-X_Sadness	Null	0.0269367
motor cortex	PANAS-X_Self-Assurance	Experimental	0.0985921
motor cortex	PANAS-X_Self-Assurance	Null	0.0345576
motor cortex	PANAS-X_Serenity	Experimental	0.00758871
motor cortex	PANAS-X_Serenity	Null	0.0295832
motor cortex	PANAS-X_Shyness	Experimental	0.00315128
motor cortex	PANAS-X_Shyness	Null	0.029496
motor cortex	PANAS-X_Surprise	Experimental	0.0247212
motor cortex	PANAS-X_Surprise	Null	0.0293482
motor cortex	PSQI_Sleep	Experimental	0.0501631
motor cortex	PSQI_Sleep	Null	0.031391
motor cortex	PSS_Stress	Experimental	0.0969634
motor cortex	PSS_Stress	Null	0.0294051
salience	ATQ_Activation	Experimental	0
salience	ATQ_Activation	Null	0.0261056
salience	ATQ_Affective Sensitivity	Experimental	0.023719
salience	ATQ_Affective Sensitivity	Null	0.0251743
salience	ATQ_Associative Sensitivity	Experimental	0.00929934
salience	ATQ_Associative Sensitivity	Null	0.0251492
salience	ATQ_Attention	Experimental	0
salience	ATQ_Attention	Null	0.0323586
salience	ATQ_Discomfort	Experimental	0.0876254
salience	ATQ_Discomfort	Null	0.0274648
salience	ATQ_Fear	Experimental	0.00645954
salience	ATQ_Fear	Null	0.0389877
salience	ATQ_Frustration	Experimental	0
salience	ATQ_Frustration	Null	0.028017
salience	ATQ_Inhibition	Experimental	0.0210301
salience	ATQ_Inhibition	Null	0.0292809
salience	ATQ_Neutral Sensitivity	Experimental	0.0021359
salience	ATQ_Neutral Sensitivity	Null	0.0248681
salience	ATQ_Pleasure	Experimental	0.00169695
salience	ATQ_Pleasure	Null	0.0301872
salience	ATQ_Positive Affect	Experimental	0.00123133
salience	ATQ_Positive Affect	Null	0.025177
salience	ATQ_Sadness	Experimental	0.00978724
salience	ATQ_Sadness	Null	0.0446726
salience	ATQ_Sociability	Experimental	0.000653659
salience	ATQ_Sociability	Null	0.0336738
salience	BRIEF-A_Emotional Control	Experimental	0.131877
salience	BRIEF-A_Emotional Control	Null	0.019963
salience	BRIEF-A_Infrequency	Experimental	0
salience	BRIEF-A_Infrequency	Null	0.0330723
salience	BRIEF-A_Inhibit	Experimental	0.0300599
salience	BRIEF-A_Inhibit	Null	0.0342406
salience	BRIEF-A_Initiate	Experimental	0.00146256
salience	BRIEF-A_Initiate	Null	0.0294899
salience	BRIEF-A_Org. of Materials	Experimental	0
salience	BRIEF-A_Org. of Materials	Null	0.0344238
salience	BRIEF-A_Plan/Organize	Experimental	0.000393359
salience	BRIEF-A_Plan/Organize	Null	0.0331809
salience	BRIEF-A_Self-Monitor	Experimental	0
salience	BRIEF-A_Self-Monitor	Null	0.0369976
salience	BRIEF-A_Shift	Experimental	0
salience	BRIEF-A_Shift	Null	0.0289992
salience	BRIEF-A_Task Monitor	Experimental	8.77728e-05
salience	BRIEF-A_Task Monitor	Null	0.0329262
salience	BRIEF-A_Working Memory	Experimental	0.00835283
salience	BRIEF-A_Working Memory	Null	0.033192
salience	BSI_Additional	Experimental	0.0838927
salience	BSI_Additional	Null	0.0369843
salience	BSI_Anxiety	Experimental	0.151037
salience	BSI_Anxiety	Null	0.0197029
salience	BSI_Depression	Experimental	0.0592885
salience	BSI_Depression	Null	0.0318937
salience	BSI_Hostility	Experimental	0.0207055
salience	BSI_Hostility	Null	0.0282687
salience	BSI_Interpersonal Sensitivity	Experimental	0.117439
salience	BSI_Interpersonal Sensitivity	Null	0.0332806
salience	BSI_Obsession-Compulsion	Experimental	0.0753411
salience	BSI_Obsession-Compulsion	Null	0.0334284
salience	BSI_Paranoid Ideation	Experimental	0.206248
salience	BSI_Paranoid Ideation	Null	0.029661
salience	BSI_Phobic Anxiety	Experimental	0.205542
salience	BSI_Phobic Anxiety	Null	0.0304719
salience	BSI_Psychoticism	Experimental	0.0317212
salience	BSI_Psychoticism	Null	0.0306329
salience	BSI_Somatization	Experimental	0.0878296
salience	BSI_Somatization	Null	0.0226395
salience	IRI_Empathetic Concern	Experimental	0.000184951
salience	IRI_Empathetic Concern	Null	0.0245263
salience	IRI_Fantasy	Experimental	0.00324908
salience	IRI_Fantasy	Null	0.0259722
salience	IRI_Personal Distress	Experimental	0.0761652
salience	IRI_Personal Distress	Null	0.0295089
salience	IRI_Perspective Taking	Experimental	0
salience	IRI_Perspective Taking	Null	0.0292585
salience	PANAS-X_Attentiveness	Experimental	0
salience	PANAS-X_Attentiveness	Null	0.0245102
salience	PANAS-X_Fatigue	Experimental	0.0836355
salience	PANAS-X_Fatigue	Null	0.0309507
salience	PANAS-X_Fear	Experimental	0.0159839
salience	PANAS-X_Fear	Null	0.0297866
salience	PANAS-X_Guilt	Experimental	0.00832377
salience	PANAS-X_Guilt	Null	0.0215522
salience	PANAS-X_Hostility	Experimental	0.0645653
salience	PANAS-X_Hostility	Null	0.0307816
salience	PANAS-X_Joviality	Experimental	0.0616761
salience	PANAS-X_Joviality	Null	0.0315117
salience	PANAS-X_Negative Affect	Experimental	0.0233195
salience	PANAS-X_Negative Affect	Null	0.0335744
salience	PANAS-X_Positive Affect	Experimental	7.04333e-05
salience	PANAS-X_Positive Affect	Null	0.035511
salience	PANAS-X_Sadness	Experimental	0.071943
salience	PANAS-X_Sadness	Null	0.0300869
salience	PANAS-X_Self-Assurance	Experimental	0.0178068
salience	PANAS-X_Self-Assurance	Null	0.0323335
salience	PANAS-X_Serenity	Experimental	0.00519586
salience	PANAS-X_Serenity	Null	0.0360982
salience	PANAS-X_Shyness	Experimental	0.0933237
salience	PANAS-X_Shyness	Null	0.0386601
salience	PANAS-X_Surprise	Experimental	0.162759
salience	PANAS-X_Surprise	Null	0.0312991
salience	PSQI_Sleep	Experimental	0.0910753
salience	PSQI_Sleep	Null	0.03468
salience	PSS_Stress	Experimental	0.016162
salience	PSS_Stress	Null	0.0332305
subcortical	ATQ_Activation	Experimental	0
subcortical	ATQ_Activation	Null	0.0303272
subcortical	ATQ_Affective Sensitivity	Experimental	0.0429894
subcortical	ATQ_Affective Sensitivity	Null	0.0258264
subcortical	ATQ_Associative Sensitivity	Experimental	0.0955265
subcortical	ATQ_Associative Sensitivity	Null	0.0269151
subcortical	ATQ_Attention	Experimental	0.000910112
subcortical	ATQ_Attention	Null	0.0262311
subcortical	ATQ_Discomfort	Experimental	0.0862961
subcortical	ATQ_Discomfort	Null	0.0390992
subcortical	ATQ_Fear	Experimental	0.110377
subcortical	ATQ_Fear	Null	0.0385058
subcortical	ATQ_Frustration	Experimental	0.00272035
subcortical	ATQ_Frustration	Null	0.0289397
subcortical	ATQ_Inhibition	Experimental	0.00230168
subcortical	ATQ_Inhibition	Null	0.0347924
subcortical	ATQ_Neutral Sensitivity	Experimental	0
subcortical	ATQ_Neutral Sensitivity	Null	0.0261842
subcortical	ATQ_Pleasure	Experimental	0.0694246
subcortical	ATQ_Pleasure	Null	0.0395108
subcortical	ATQ_Positive Affect	Experimental	0.101816
subcortical	ATQ_Positive Affect	Null	0.0284518
subcortical	ATQ_Sadness	Experimental	0.0840653
subcortical	ATQ_Sadness	Null	0.0243186
subcortical	ATQ_Sociability	Experimental	0.0254629
subcortical	ATQ_Sociability	Null	0.0353938
subcortical	BRIEF-A_Emotional Control	Experimental	0.00350857
subcortical	BRIEF-A_Emotional Control	Null	0.0311559
subcortical	BRIEF-A_Infrequency	Experimental	0.00936468
subcortical	BRIEF-A_Infrequency	Null	0.0287634
subcortical	BRIEF-A_Inhibit	Experimental	0.0255479
subcortical	BRIEF-A_Inhibit	Null	0.0361427
subcortical	BRIEF-A_Initiate	Experimental	0.120165
subcortical	BRIEF-A_Initiate	Null	0.0250673
subcortical	BRIEF-A_Org. of Materials	Experimental	9.90814e-05
subcortical	BRIEF-A_Org. of Materials	Null	0.0277438
subcortical	BRIEF-A_Plan/Organize	Experimental	0.0325477
subcortical	BRIEF-A_Plan/Organize	Null	0.037861
subcortical	BRIEF-A_Self-Monitor	Experimental	0
subcortical	BRIEF-A_Self-Monitor	Null	0.0270113
subcortical	BRIEF-A_Shift	Experimental	0.0342842
subcortical	BRIEF-A_Shift	Null	0.0263777
subcortical	BRIEF-A_Task Monitor	Experimental	0.00196783
subcortical	BRIEF-A_Task Monitor	Null	0.0314101
subcortical	BRIEF-A_Working Memory	Experimental	0.0187571
subcortical	BRIEF-A_Working Memory	Null	0.0397458
subcortical	BSI_Additional	Experimental	0.0451578
subcortical	BSI_Additional	Null	0.0425399
subcortical	BSI_Anxiety	Experimental	0.0617773
subcortical	BSI_Anxiety	Null	0.0280219
subcortical	BSI_Depression	Experimental	0.0124767
subcortical	BSI_Depression	Null	0.0277102
subcortical	BSI_Hostility	Experimental	0.111008
subcortical	BSI_Hostility	Null	0.0329561
subcortical	BSI_Interpersonal Sensitivity	Experimental	0.0036062
subcortical	BSI_Interpersonal Sensitivity	Null	0.0337209
subcortical	BSI_Obsession-Compulsion	Experimental	0.000810771
subcortical	BSI_Obsession-Compulsion	Null	0.0336562
subcortical	BSI_Paranoid Ideation	Experimental	0
subcortical	BSI_Paranoid Ideation	Null	0.0294517
subcortical	BSI_Phobic Anxiety	Experimental	0.0597107
subcortical	BSI_Phobic Anxiety	Null	0.0323975
subcortical	BSI_Psychoticism	Experimental	0.000124582
subcortical	BSI_Psychoticism	Null	0.0285737
subcortical	BSI_Somatization	Experimental	0.0995798
subcortical	BSI_Somatization	Null	0.0301516
subcortical	IRI_Empathetic Concern	Experimental	0.0434069
subcortical	IRI_Empathetic Concern	Null	0.0350394
subcortical	IRI_Fantasy	Experimental	0.0405805
subcortical	IRI_Fantasy	Null	0.0389416
subcortical	IRI_Personal Distress	Experimental	0.0133888
subcortical	IRI_Personal Distress	Null	0.0320541
subcortical	IRI_Perspective Taking	Experimental	0.153442
subcortical	IRI_Perspective Taking	Null	0.0299071
subcortical	PANAS-X_Attentiveness	Experimental	0.0976932
subcortical	PANAS-X_Attentiveness	Null	0.0316666
subcortical	PANAS-X_Fatigue	Experimental	0.00472055
subcortical	PANAS-X_Fatigue	Null	0.0357674
subcortical	PANAS-X_Fear	Experimental	0.0210441
subcortical	PANAS-X_Fear	Null	0.0341613
subcortical	PANAS-X_Guilt	Experimental	0.0829021
subcortical	PANAS-X_Guilt	Null	0.0291848
subcortical	PANAS-X_Hostility	Experimental	0.131611
subcortical	PANAS-X_Hostility	Null	0.0363355
subcortical	PANAS-X_Joviality	Experimental	0.0026605
subcortical	PANAS-X_Joviality	Null	0.0325587
subcortical	PANAS-X_Negative Affect	Experimental	0.0531845
subcortical	PANAS-X_Negative Affect	Null	0.0366529
subcortical	PANAS-X_Positive Affect	Experimental	0.0714179
subcortical	PANAS-X_Positive Affect	Null	0.037223
subcortical	PANAS-X_Sadness	Experimental	0.0281317
subcortical	PANAS-X_Sadness	Null	0.0323392
subcortical	PANAS-X_Self-Assurance	Experimental	0.135062
subcortical	PANAS-X_Self-Assurance	Null	0.0294171
subcortical	PANAS-X_Serenity	Experimental	0.0250949
subcortical	PANAS-X_Serenity	Null	0.0287539
subcortical	PANAS-X_Shyness	Experimental	0.0265737
subcortical	PANAS-X_Shyness	Null	0.0325948
subcortical	PANAS-X_Surprise	Experimental	0.0122287
subcortical	PANAS-X_Surprise	Null	0.0294826
subcortical	PSQI_Sleep	Experimental	0.113825
subcortical	PSQI_Sleep	Null	0.0358144
subcortical	PSS_Stress	Experimental	0.000730954
subcortical	PSS_Stress	Null	0.0311042
visual A	ATQ_Activation	Experimental	0.0917572
visual A	ATQ_Activation	Null	0.0372764
visual A	ATQ_Affective Sensitivity	Experimental	0.00054814
visual A	ATQ_Affective Sensitivity	Null	0.0283631
visual A	ATQ_Associative Sensitivity	Experimental	0.0109613
visual A	ATQ_Associative Sensitivity	Null	0.0343396
visual A	ATQ_Attention	Experimental	0.0133699
visual A	ATQ_Attention	Null	0.0270545
visual A	ATQ_Discomfort	Experimental	0.00851579
visual A	ATQ_Discomfort	Null	0.0285936
visual A	ATQ_Fear	Experimental	0.00399412
visual A	ATQ_Fear	Null	0.0439427
visual A	ATQ_Frustration	Experimental	0.0020422
visual A	ATQ_Frustration	Null	0.0336243
visual A	ATQ_Inhibition	Experimental	0.0344465
visual A	ATQ_Inhibition	Null	0.0247764
visual A	ATQ_Neutral Sensitivity	Experimental	0.134516
visual A	ATQ_Neutral Sensitivity	Null	0.0289558
visual A	ATQ_Pleasure	Experimental	0.0119114
visual A	ATQ_Pleasure	Null	0.0281237
visual A	ATQ_Positive Affect	Experimental	0.0143471
visual A	ATQ_Positive Affect	Null	0.0375322
visual A	ATQ_Sadness	Experimental	0.00102634
visual A	ATQ_Sadness	Null	0.0348826
visual A	ATQ_Sociability	Experimental	0.0211782
visual A	ATQ_Sociability	Null	0.0287041
visual A	BRIEF-A_Emotional Control	Experimental	0.0254182
visual A	BRIEF-A_Emotional Control	Null	0.0238498
visual A	BRIEF-A_Infrequency	Experimental	0
visual A	BRIEF-A_Infrequency	Null	0.0248099
visual A	BRIEF-A_Inhibit	Experimental	0
visual A	BRIEF-A_Inhibit	Null	0.0347199
visual A	BRIEF-A_Initiate	Experimental	0.00303996
visual A	BRIEF-A_Initiate	Null	0.0305326
visual A	BRIEF-A_Org. of Materials	Experimental	0.00114909
visual A	BRIEF-A_Org. of Materials	Null	0.0379109
visual A	BRIEF-A_Plan/Organize	Experimental	0
visual A	BRIEF-A_Plan/Organize	Null	0.0293305
visual A	BRIEF-A_Self-Monitor	Experimental	0.0246335
visual A	BRIEF-A_Self-Monitor	Null	0.0317258
visual A	BRIEF-A_Shift	Experimental	0
visual A	BRIEF-A_Shift	Null	0.0227563
visual A	BRIEF-A_Task Monitor	Experimental	0
visual A	BRIEF-A_Task Monitor	Null	0.0302451
visual A	BRIEF-A_Working Memory	Experimental	0.00267588
visual A	BRIEF-A_Working Memory	Null	0.0370957
visual A	BSI_Additional	Experimental	0
visual A	BSI_Additional	Null	0.0290735
visual A	BSI_Anxiety	Experimental	0.0396343
visual A	BSI_Anxiety	Null	0.0235743
visual A	BSI_Depression	Experimental	0.00110895
visual A	BSI_Depression	Null	0.0253885
visual A	BSI_Hostility	Experimental	0.00553362
visual A	BSI_Hostility	Null	0.031257
visual A	BSI_Interpersonal Sensitivity	Experimental	0.00027136
visual A	BSI_Interpersonal Sensitivity	Null	0.0329349
visual A	BSI_Obsession-Compulsion	Experimental	0.00853953
visual A	BSI_Obsession-Compulsion	Null	0.0315087
visual A	BSI_Paranoid Ideation	Experimental	0.0173201
visual A	BSI_Paranoid Ideation	Null	0.0296237
visual A	BSI_Phobic Anxiety	Experimental	0.0826082
visual A	BSI_Phobic Anxiety	Null	0.0324168
visual A	BSI_Psychoticism	Experimental	0.000112275
visual A	BSI_Psychoticism	Null	0.0250702
visual A	BSI_Somatization	Experimental	0.00484695
visual A	BSI_Somatization	Null	0.0313574
visual A	IRI_Empathetic Concern	Experimental	0.03916
visual A	IRI_Empathetic Concern	Null	0.0276627
visual A	IRI_Fantasy	Experimental	0.0440185
visual A	IRI_Fantasy	Null	0.0370725
visual A	IRI_Personal Distress	Experimental	0.0043137
visual A	IRI_Personal Distress	Null	0.0269138
visual A	IRI_Perspective Taking	Experimental	0.0670407
visual A	IRI_Perspective Taking	Null	0.0430361
visual A	PANAS-X_Attentiveness	Experimental	0.0483639
visual A	PANAS-X_Attentiveness	Null	0.0301614
visual A	PANAS-X_Fatigue	Experimental	0.00121684
visual A	PANAS-X_Fatigue	Null	0.030445
visual A	PANAS-X_Fear	Experimental	0.0499978
visual A	PANAS-X_Fear	Null	0.0309033
visual A	PANAS-X_Guilt	Experimental	0
visual A	PANAS-X_Guilt	Null	0.0261712
visual A	PANAS-X_Hostility	Experimental	0.00729464
visual A	PANAS-X_Hostility	Null	0.0363147
visual A	PANAS-X_Joviality	Experimental	0
visual A	PANAS-X_Joviality	Null	0.0326493
visual A	PANAS-X_Negative Affect	Experimental	0.0414858
visual A	PANAS-X_Negative Affect	Null	0.0349467
visual A	PANAS-X_Positive Affect	Experimental	0.00177897
visual A	PANAS-X_Positive Affect	Null	0.0293083
visual A	PANAS-X_Sadness	Experimental	0.00295416
visual A	PANAS-X_Sadness	Null	0.0296063
visual A	PANAS-X_Self-Assurance	Experimental	0.00854796
visual A	PANAS-X_Self-Assurance	Null	0.0304484
visual A	PANAS-X_Serenity	Experimental	0
visual A	PANAS-X_Serenity	Null	0.035061
visual A	PANAS-X_Shyness	Experimental	0.00378049
visual A	PANAS-X_Shyness	Null	0.033239
visual A	PANAS-X_Surprise	Experimental	0.0527528
visual A	PANAS-X_Surprise	Null	0.0261097
visual A	PSQI_Sleep	Experimental	0.00922351
visual A	PSQI_Sleep	Null	0.0394243
visual A	PSS_Stress	Experimental	0.0154827
visual A	PSS_Stress	Null	0.0291495
visual B	ATQ_Activation	Experimental	0.031822
visual B	ATQ_Activation	Null	0.0308543
visual B	ATQ_Affective Sensitivity	Experimental	0.0382504
visual B	ATQ_Affective Sensitivity	Null	0.0242226
visual B	ATQ_Associative Sensitivity	Experimental	0.0138956
visual B	ATQ_Associative Sensitivity	Null	0.0304059
visual B	ATQ_Attention	Experimental	0.00649968
visual B	ATQ_Attention	Null	0.022079
visual B	ATQ_Discomfort	Experimental	0.0210343
visual B	ATQ_Discomfort	Null	0.0240878
visual B	ATQ_Fear	Experimental	0.0510149
visual B	ATQ_Fear	Null	0.0288651
visual B	ATQ_Frustration	Experimental	0.109199
visual B	ATQ_Frustration	Null	0.0261519
visual B	ATQ_Inhibition	Experimental	0.00268343
visual B	ATQ_Inhibition	Null	0.0286253
visual B	ATQ_Neutral Sensitivity	Experimental	0.0178718
visual B	ATQ_Neutral Sensitivity	Null	0.0290348
visual B	ATQ_Pleasure	Experimental	0.00773601
visual B	ATQ_Pleasure	Null	0.0244875
visual B	ATQ_Positive Affect	Experimental	0.00843377
visual B	ATQ_Positive Affect	Null	0.028578
visual B	ATQ_Sadness	Experimental	0.0528339
visual B	ATQ_Sadness	Null	0.0306325
visual B	ATQ_Sociability	Experimental	0.0259328
visual B	ATQ_Sociability	Null	0.0264347
visual B	BRIEF-A_Emotional Control	Experimental	0.0166019
visual B	BRIEF-A_Emotional Control	Null	0.0343164
visual B	BRIEF-A_Infrequency	Experimental	0.0215781
visual B	BRIEF-A_Infrequency	Null	0.0312067
visual B	BRIEF-A_Inhibit	Experimental	0.0139701
visual B	BRIEF-A_Inhibit	Null	0.0278142
visual B	BRIEF-A_Initiate	Experimental	0.0545271
visual B	BRIEF-A_Initiate	Null	0.0343471
visual B	BRIEF-A_Org. of Materials	Experimental	0.0388177
visual B	BRIEF-A_Org. of Materials	Null	0.0327953
visual B	BRIEF-A_Plan/Organize	Experimental	0.0195056
visual B	BRIEF-A_Plan/Organize	Null	0.0300474
visual B	BRIEF-A_Self-Monitor	Experimental	0.0019933
visual B	BRIEF-A_Self-Monitor	Null	0.0243933
visual B	BRIEF-A_Shift	Experimental	0.0097871
visual B	BRIEF-A_Shift	Null	0.0296224
visual B	BRIEF-A_Task Monitor	Experimental	0.013237
visual B	BRIEF-A_Task Monitor	Null	0.0279564
visual B	BRIEF-A_Working Memory	Experimental	0.00711429
visual B	BRIEF-A_Working Memory	Null	0.0243648
visual B	BSI_Additional	Experimental	0.00489898
visual B	BSI_Additional	Null	0.0234683
visual B	BSI_Anxiety	Experimental	0.0351992
visual B	BSI_Anxiety	Null	0.0318616
visual B	BSI_Depression	Experimental	0.0366473
visual B	BSI_Depression	Null	0.0246078
visual B	BSI_Hostility	Experimental	0.0265591
visual B	BSI_Hostility	Null	0.0237959
visual B	BSI_Interpersonal Sensitivity	Experimental	0.0571406
visual B	BSI_Interpersonal Sensitivity	Null	0.0260757
visual B	BSI_Obsession-Compulsion	Experimental	0.0288675
visual B	BSI_Obsession-Compulsion	Null	0.023837
visual B	BSI_Paranoid Ideation	Experimental	0.00488265
visual B	BSI_Paranoid Ideation	Null	0.0280767
visual B	BSI_Phobic Anxiety	Experimental	0.0462117
visual B	BSI_Phobic Anxiety	Null	0.0292497
visual B	BSI_Psychoticism	Experimental	0.0251641
visual B	BSI_Psychoticism	Null	0.0338349
visual B	BSI_Somatization	Experimental	0.0179864
visual B	BSI_Somatization	Null	0.0236708
visual B	IRI_Empathetic Concern	Experimental	0.0062029
visual B	IRI_Empathetic Concern	Null	0.0332502
visual B	IRI_Fantasy	Experimental	0.101899
visual B	IRI_Fantasy	Null	0.0270761
visual B	IRI_Personal Distress	Experimental	0.0263208
visual B	IRI_Personal Distress	Null	0.0218289
visual B	IRI_Perspective Taking	Experimental	0.0502981
visual B	IRI_Perspective Taking	Null	0.0286258
visual B	PANAS-X_Attentiveness	Experimental	0.0314373
visual B	PANAS-X_Attentiveness	Null	0.0277284
visual B	PANAS-X_Fatigue	Experimental	0.0141829
visual B	PANAS-X_Fatigue	Null	0.028948
visual B	PANAS-X_Fear	Experimental	0.0499862
visual B	PANAS-X_Fear	Null	0.029472
visual B	PANAS-X_Guilt	Experimental	0.0475731
visual B	PANAS-X_Guilt	Null	0.0258919
visual B	PANAS-X_Hostility	Experimental	0.0383344
visual B	PANAS-X_Hostility	Null	0.0212891
visual B	PANAS-X_Joviality	Experimental	0.0273994
visual B	PANAS-X_Joviality	Null	0.0332289
visual B	PANAS-X_Negative Affect	Experimental	0.0381836
visual B	PANAS-X_Negative Affect	Null	0.0208411
visual B	PANAS-X_Positive Affect	Experimental	0.0131009
visual B	PANAS-X_Positive Affect	Null	0.0204656
visual B	PANAS-X_Sadness	Experimental	0.0275245
visual B	PANAS-X_Sadness	Null	0.0297591
visual B	PANAS-X_Self-Assurance	Experimental	0.0495879
visual B	PANAS-X_Self-Assurance	Null	0.0283846
visual B	PANAS-X_Serenity	Experimental	0.0144287
visual B	PANAS-X_Serenity	Null	0.0271029
visual B	PANAS-X_Shyness	Experimental	0.0910792
visual B	PANAS-X_Shyness	Null	0.0304421
visual B	PANAS-X_Surprise	Experimental	0.0288551
visual B	PANAS-X_Surprise	Null	0.0258727
visual B	PSQI_Sleep	Experimental	0.0447035
visual B	PSQI_Sleep	Null	0.0264247
visual B	PSS_Stress	Experimental	0.00996716
visual B	PSS_Stress	Null	0.0245968
visual association	ATQ_Activation	Experimental	0.0618899
visual association	ATQ_Activation	Null	0.0277319
visual association	ATQ_Affective Sensitivity	Experimental	0.0442697
visual association	ATQ_Affective Sensitivity	Null	0.0313399
visual association	ATQ_Associative Sensitivity	Experimental	0.0352585
visual association	ATQ_Associative Sensitivity	Null	0.0325341
visual association	ATQ_Attention	Experimental	0.0154255
visual association	ATQ_Attention	Null	0.0356651
visual association	ATQ_Discomfort	Experimental	0.0191441
visual association	ATQ_Discomfort	Null	0.0323621
visual association	ATQ_Fear	Experimental	0.000410707
visual association	ATQ_Fear	Null	0.0323049
visual association	ATQ_Frustration	Experimental	0.00368388
visual association	ATQ_Frustration	Null	0.0321801
visual association	ATQ_Inhibition	Experimental	0.0132789
visual association	ATQ_Inhibition	Null	0.0247999
visual association	ATQ_Neutral Sensitivity	Experimental	0.0769749
visual association	ATQ_Neutral Sensitivity	Null	0.0271352
visual association	ATQ_Pleasure	Experimental	0.0188472
visual association	ATQ_Pleasure	Null	0.0365113
visual association	ATQ_Positive Affect	Experimental	0.0702418
visual association	ATQ_Positive Affect	Null	0.0283578
visual association	ATQ_Sadness	Experimental	0.00528676
visual association	ATQ_Sadness	Null	0.0244626
visual association	ATQ_Sociability	Experimental	0
visual association	ATQ_Sociability	Null	0.0294098
visual association	BRIEF-A_Emotional Control	Experimental	0.0228183
visual association	BRIEF-A_Emotional Control	Null	0.0360836
visual association	BRIEF-A_Infrequency	Experimental	0.00285697
visual association	BRIEF-A_Infrequency	Null	0.0351127
visual association	BRIEF-A_Inhibit	Experimental	0.107474
visual association	BRIEF-A_Inhibit	Null	0.0232676
visual association	BRIEF-A_Initiate	Experimental	0.0725569
visual association	BRIEF-A_Initiate	Null	0.034294
visual association	BRIEF-A_Org. of Materials	Experimental	0.0117817
visual association	BRIEF-A_Org. of Materials	Null	0.0330249
visual association	BRIEF-A_Plan/Organize	Experimental	0.0387222
visual association	BRIEF-A_Plan/Organize	Null	0.0325573
visual association	BRIEF-A_Self-Monitor	Experimental	0.0188294
visual association	BRIEF-A_Self-Monitor	Null	0.0350824
visual association	BRIEF-A_Shift	Experimental	0.0423383
visual association	BRIEF-A_Shift	Null	0.0295088
visual association	BRIEF-A_Task Monitor	Experimental	0.133964
visual association	BRIEF-A_Task Monitor	Null	0.0360482
visual association	BRIEF-A_Working Memory	Experimental	0.0451059
visual association	BRIEF-A_Working Memory	Null	0.0321139
visual association	BSI_Additional	Experimental	0.00701194
visual association	BSI_Additional	Null	0.0310058
visual association	BSI_Anxiety	Experimental	3.65037e-05
visual association	BSI_Anxiety	Null	0.0312391
visual association	BSI_Depression	Experimental	0.0809934
visual association	BSI_Depression	Null	0.0307445
visual association	BSI_Hostility	Experimental	0.00148289
visual association	BSI_Hostility	Null	0.0257482
visual association	BSI_Interpersonal Sensitivity	Experimental	0.0442355
visual association	BSI_Interpersonal Sensitivity	Null	0.0334418
visual association	BSI_Obsession-Compulsion	Experimental	0.0898615
visual association	BSI_Obsession-Compulsion	Null	0.0264671
visual association	BSI_Paranoid Ideation	Experimental	0.0036757
visual association	BSI_Paranoid Ideation	Null	0.0238805
visual association	BSI_Phobic Anxiety	Experimental	0.0614469
visual association	BSI_Phobic Anxiety	Null	0.0333814
visual association	BSI_Psychoticism	Experimental	0.0503089
visual association	BSI_Psychoticism	Null	0.0277529
visual association	BSI_Somatization	Experimental	0.000285313
visual association	BSI_Somatization	Null	0.0352907
visual association	IRI_Empathetic Concern	Experimental	0.175077
visual association	IRI_Empathetic Concern	Null	0.0267319
visual association	IRI_Fantasy	Experimental	0.163595
visual association	IRI_Fantasy	Null	0.0321639
visual association	IRI_Personal Distress	Experimental	0.0129351
visual association	IRI_Personal Distress	Null	0.034177
visual association	IRI_Perspective Taking	Experimental	0.100894
visual association	IRI_Perspective Taking	Null	0.0377019
visual association	PANAS-X_Attentiveness	Experimental	0.00412186
visual association	PANAS-X_Attentiveness	Null	0.0365473
visual association	PANAS-X_Fatigue	Experimental	0.026746
visual association	PANAS-X_Fatigue	Null	0.0391374
visual association	PANAS-X_Fear	Experimental	0.0046623
visual association	PANAS-X_Fear	Null	0.0388359
visual association	PANAS-X_Guilt	Experimental	0.11758
visual association	PANAS-X_Guilt	Null	0.0298984
visual association	PANAS-X_Hostility	Experimental	0.0412584
visual association	PANAS-X_Hostility	Null	0.0212869
visual association	PANAS-X_Joviality	Experimental	0.109888
visual association	PANAS-X_Joviality	Null	0.0327549
visual association	PANAS-X_Negative Affect	Experimental	0.0344092
visual association	PANAS-X_Negative Affect	Null	0.0297182
visual association	PANAS-X_Positive Affect	Experimental	0.0839785
visual association	PANAS-X_Positive Affect	Null	0.0321177
visual association	PANAS-X_Sadness	Experimental	0.0285602
visual association	PANAS-X_Sadness	Null	0.0311921
visual association	PANAS-X_Self-Assurance	Experimental	0.0274977
visual association	PANAS-X_Self-Assurance	Null	0.0375903
visual association	PANAS-X_Serenity	Experimental	0.0601546
visual association	PANAS-X_Serenity	Null	0.0337323
visual association	PANAS-X_Shyness	Experimental	0.0288854
visual association	PANAS-X_Shyness	Null	0.0348036
visual association	PANAS-X_Surprise	Experimental	0.0119018
visual association	PANAS-X_Surprise	Null	0.0289722
visual association	PSQI_Sleep	Experimental	0.036073
visual association	PSQI_Sleep	Null	0.0311361
visual association	PSS_Stress	Experimental	0.16014
visual association	PSS_Stress	Null	0.0320547

## Sheet: Supplementary Table 7
network	network_composite	group	pred_power
cerebellum	cerebellum_top_10	Experimental	0.357298
cerebellum	cerebellum_top_10	Null	0.0362944
cerebellum	cerebellum_top_15	Experimental	0.331994
cerebellum	cerebellum_top_15	Null	0.0221942
cerebellum	cerebellum_top_20	Experimental	0.334799
cerebellum	cerebellum_top_20	Null	0.030852
cerebellum	cerebellum_top_25	Experimental	0.316401
cerebellum	cerebellum_top_25	Null	0.0350639
cerebellum	cerebellum_top_3	Experimental	0.32414
cerebellum	cerebellum_top_3	Null	0.0234157
cerebellum	cerebellum_top_5	Experimental	0.307501
cerebellum	cerebellum_top_5	Null	0.0317838
cerebellum	cerebellum_top_50	Experimental	0.272334
cerebellum	cerebellum_top_50	Null	0.0356934
cerebellum	default mode_top_10	Experimental	0.00630772
cerebellum	default mode_top_10	Null	0.0384094
cerebellum	default mode_top_15	Experimental	0.0218915
cerebellum	default mode_top_15	Null	0.0328361
cerebellum	default mode_top_20	Experimental	0.0509977
cerebellum	default mode_top_20	Null	0.02612
cerebellum	default mode_top_25	Experimental	0.100589
cerebellum	default mode_top_25	Null	0.0295418
cerebellum	default mode_top_3	Experimental	0.00211715
cerebellum	default mode_top_3	Null	0.0243632
cerebellum	default mode_top_5	Experimental	0.000228513
cerebellum	default mode_top_5	Null	0.028139
cerebellum	default mode_top_50	Experimental	0.129902
cerebellum	default mode_top_50	Null	0.0275241
cerebellum	frontoparietal_top_10	Experimental	0.102878
cerebellum	frontoparietal_top_10	Null	0.0332042
cerebellum	frontoparietal_top_15	Experimental	0.101247
cerebellum	frontoparietal_top_15	Null	0.0296969
cerebellum	frontoparietal_top_20	Experimental	0.11804
cerebellum	frontoparietal_top_20	Null	0.0310665
cerebellum	frontoparietal_top_25	Experimental	0.160459
cerebellum	frontoparietal_top_25	Null	0.0309533
cerebellum	frontoparietal_top_3	Experimental	0.133013
cerebellum	frontoparietal_top_3	Null	0.0328944
cerebellum	frontoparietal_top_5	Experimental	0.118377
cerebellum	frontoparietal_top_5	Null	0.0341841
cerebellum	frontoparietal_top_50	Experimental	0.165039
cerebellum	frontoparietal_top_50	Null	0.026452
cerebellum	medial frontal_top_10	Experimental	0.106061
cerebellum	medial frontal_top_10	Null	0.0171367
cerebellum	medial frontal_top_15	Experimental	0.140187
cerebellum	medial frontal_top_15	Null	0.0283392
cerebellum	medial frontal_top_20	Experimental	0.133117
cerebellum	medial frontal_top_20	Null	0.0229778
cerebellum	medial frontal_top_25	Experimental	0.118375
cerebellum	medial frontal_top_25	Null	0.0313824
cerebellum	medial frontal_top_3	Experimental	0.0794924
cerebellum	medial frontal_top_3	Null	0.0336913
cerebellum	medial frontal_top_5	Experimental	0.0986013
cerebellum	medial frontal_top_5	Null	0.026726
cerebellum	medial frontal_top_50	Experimental	0.12362
cerebellum	medial frontal_top_50	Null	0.027899
cerebellum	motor cortex_top_10	Experimental	0.178888
cerebellum	motor cortex_top_10	Null	0.0329595
cerebellum	motor cortex_top_15	Experimental	0.193134
cerebellum	motor cortex_top_15	Null	0.0253924
cerebellum	motor cortex_top_20	Experimental	0.179653
cerebellum	motor cortex_top_20	Null	0.0276416
cerebellum	motor cortex_top_25	Experimental	0.167591
cerebellum	motor cortex_top_25	Null	0.0350554
cerebellum	motor cortex_top_3	Experimental	0.166074
cerebellum	motor cortex_top_3	Null	0.0282964
cerebellum	motor cortex_top_5	Experimental	0.1766
cerebellum	motor cortex_top_5	Null	0.03951
cerebellum	motor cortex_top_50	Experimental	0.150382
cerebellum	motor cortex_top_50	Null	0.0313818
cerebellum	salience_top_10	Experimental	0.114324
cerebellum	salience_top_10	Null	0.0319181
cerebellum	salience_top_15	Experimental	0.10499
cerebellum	salience_top_15	Null	0.024493
cerebellum	salience_top_20	Experimental	0.106231
cerebellum	salience_top_20	Null	0.0300682
cerebellum	salience_top_25	Experimental	0.10248
cerebellum	salience_top_25	Null	0.0327999
cerebellum	salience_top_3	Experimental	0.10371
cerebellum	salience_top_3	Null	0.0266163
cerebellum	salience_top_5	Experimental	0.124884
cerebellum	salience_top_5	Null	0.0342194
cerebellum	salience_top_50	Experimental	0.128584
cerebellum	salience_top_50	Null	0.0318657
cerebellum	subcortical_top_10	Experimental	0.190964
cerebellum	subcortical_top_10	Null	0.0295656
cerebellum	subcortical_top_15	Experimental	0.208965
cerebellum	subcortical_top_15	Null	0.0283404
cerebellum	subcortical_top_20	Experimental	0.174552
cerebellum	subcortical_top_20	Null	0.0243908
cerebellum	subcortical_top_25	Experimental	0.211901
cerebellum	subcortical_top_25	Null	0.0288818
cerebellum	subcortical_top_3	Experimental	0.108024
cerebellum	subcortical_top_3	Null	0.0335955
cerebellum	subcortical_top_5	Experimental	0.0936664
cerebellum	subcortical_top_5	Null	0.0262483
cerebellum	subcortical_top_50	Experimental	0.221035
cerebellum	subcortical_top_50	Null	0.0313827
cerebellum	visual A_top_10	Experimental	0.12158
cerebellum	visual A_top_10	Null	0.0254712
cerebellum	visual A_top_15	Experimental	0.167
cerebellum	visual A_top_15	Null	0.0380965
cerebellum	visual A_top_20	Experimental	0.0919893
cerebellum	visual A_top_20	Null	0.0319233
cerebellum	visual A_top_25	Experimental	0.0893278
cerebellum	visual A_top_25	Null	0.0357691
cerebellum	visual A_top_3	Experimental	0.0924214
cerebellum	visual A_top_3	Null	0.0260004
cerebellum	visual A_top_5	Experimental	0.0918617
cerebellum	visual A_top_5	Null	0.0301392
cerebellum	visual A_top_50	Experimental	0.123499
cerebellum	visual A_top_50	Null	0.0277223
cerebellum	visual B_top_10	Experimental	0.0744073
cerebellum	visual B_top_10	Null	0.0294602
cerebellum	visual B_top_15	Experimental	0.137842
cerebellum	visual B_top_15	Null	0.0313694
cerebellum	visual B_top_20	Experimental	0.133009
cerebellum	visual B_top_20	Null	0.0203542
cerebellum	visual B_top_25	Experimental	0.114531
cerebellum	visual B_top_25	Null	0.03922
cerebellum	visual B_top_3	Experimental	0.0656528
cerebellum	visual B_top_3	Null	0.0397369
cerebellum	visual B_top_5	Experimental	0.0724512
cerebellum	visual B_top_5	Null	0.0316534
cerebellum	visual B_top_50	Experimental	0.146662
cerebellum	visual B_top_50	Null	0.0442801
cerebellum	visual association_top_10	Experimental	0.101005
cerebellum	visual association_top_10	Null	0.0271532
cerebellum	visual association_top_15	Experimental	0.0675654
cerebellum	visual association_top_15	Null	0.0308942
cerebellum	visual association_top_20	Experimental	0.0917245
cerebellum	visual association_top_20	Null	0.0262403
cerebellum	visual association_top_25	Experimental	0.0974718
cerebellum	visual association_top_25	Null	0.0309349
cerebellum	visual association_top_3	Experimental	0.156935
cerebellum	visual association_top_3	Null	0.0280829
cerebellum	visual association_top_5	Experimental	0.104126
cerebellum	visual association_top_5	Null	0.0307723
cerebellum	visual association_top_50	Experimental	0.0903689
cerebellum	visual association_top_50	Null	0.034489
default mode	cerebellum_top_10	Experimental	0.00049354
default mode	cerebellum_top_10	Null	0.0311925
default mode	cerebellum_top_15	Experimental	5.93219e-06
default mode	cerebellum_top_15	Null	0.0360511
default mode	cerebellum_top_20	Experimental	0.00460993
default mode	cerebellum_top_20	Null	0.0252523
default mode	cerebellum_top_25	Experimental	0.0113729
default mode	cerebellum_top_25	Null	0.031007
default mode	cerebellum_top_3	Experimental	0.0716607
default mode	cerebellum_top_3	Null	0.0285453
default mode	cerebellum_top_5	Experimental	0.000848395
default mode	cerebellum_top_5	Null	0.0305839
default mode	cerebellum_top_50	Experimental	7.05607e-05
default mode	cerebellum_top_50	Null	0.0336606
default mode	default mode_top_10	Experimental	0.215122
default mode	default mode_top_10	Null	0.0388735
default mode	default mode_top_15	Experimental	0.251903
default mode	default mode_top_15	Null	0.0262707
default mode	default mode_top_20	Experimental	0.284058
default mode	default mode_top_20	Null	0.0291513
default mode	default mode_top_25	Experimental	0.280652
default mode	default mode_top_25	Null	0.0284698
default mode	default mode_top_3	Experimental	0.204775
default mode	default mode_top_3	Null	0.0246187
default mode	default mode_top_5	Experimental	0.253262
default mode	default mode_top_5	Null	0.0279656
default mode	default mode_top_50	Experimental	0.189753
default mode	default mode_top_50	Null	0.0301096
default mode	frontoparietal_top_10	Experimental	0
default mode	frontoparietal_top_10	Null	0.033489
default mode	frontoparietal_top_15	Experimental	0
default mode	frontoparietal_top_15	Null	0.0358737
default mode	frontoparietal_top_20	Experimental	0
default mode	frontoparietal_top_20	Null	0.035246
default mode	frontoparietal_top_25	Experimental	0
default mode	frontoparietal_top_25	Null	0.029532
default mode	frontoparietal_top_3	Experimental	0.042006
default mode	frontoparietal_top_3	Null	0.0331487
default mode	frontoparietal_top_5	Experimental	0.000480093
default mode	frontoparietal_top_5	Null	0.0393476
default mode	frontoparietal_top_50	Experimental	0.0112373
default mode	frontoparietal_top_50	Null	0.0337414
default mode	medial frontal_top_10	Experimental	7.07567e-05
default mode	medial frontal_top_10	Null	0.0306964
default mode	medial frontal_top_15	Experimental	0.000247662
default mode	medial frontal_top_15	Null	0.0373146
default mode	medial frontal_top_20	Experimental	0.00165483
default mode	medial frontal_top_20	Null	0.0284042
default mode	medial frontal_top_25	Experimental	0.00174263
default mode	medial frontal_top_25	Null	0.0222503
default mode	medial frontal_top_3	Experimental	0.000599395
default mode	medial frontal_top_3	Null	0.0302174
default mode	medial frontal_top_5	Experimental	0
default mode	medial frontal_top_5	Null	0.0275195
default mode	medial frontal_top_50	Experimental	0.00102129
default mode	medial frontal_top_50	Null	0.0372409
default mode	motor cortex_top_10	Experimental	0.141669
default mode	motor cortex_top_10	Null	0.0260351
default mode	motor cortex_top_15	Experimental	0.10236
default mode	motor cortex_top_15	Null	0.041167
default mode	motor cortex_top_20	Experimental	0.0811482
default mode	motor cortex_top_20	Null	0.0321497
default mode	motor cortex_top_25	Experimental	0.0255514
default mode	motor cortex_top_25	Null	0.033111
default mode	motor cortex_top_3	Experimental	0.112152
default mode	motor cortex_top_3	Null	0.0317633
default mode	motor cortex_top_5	Experimental	0.125364
default mode	motor cortex_top_5	Null	0.0364523
default mode	motor cortex_top_50	Experimental	0.0203673
default mode	motor cortex_top_50	Null	0.0235986
default mode	salience_top_10	Experimental	0.0610391
default mode	salience_top_10	Null	0.0283396
default mode	salience_top_15	Experimental	0.0323511
default mode	salience_top_15	Null	0.0357104
default mode	salience_top_20	Experimental	0.0460299
default mode	salience_top_20	Null	0.0244502
default mode	salience_top_25	Experimental	0.0329065
default mode	salience_top_25	Null	0.0323678
default mode	salience_top_3	Experimental	0.01087
default mode	salience_top_3	Null	0.039085
default mode	salience_top_5	Experimental	0.0572388
default mode	salience_top_5	Null	0.0325417
default mode	salience_top_50	Experimental	0.0266164
default mode	salience_top_50	Null	0.0372419
default mode	subcortical_top_10	Experimental	0.0492981
default mode	subcortical_top_10	Null	0.0313043
default mode	subcortical_top_15	Experimental	0.068181
default mode	subcortical_top_15	Null	0.0317901
default mode	subcortical_top_20	Experimental	0.0816495
default mode	subcortical_top_20	Null	0.035258
default mode	subcortical_top_25	Experimental	0.0714669
default mode	subcortical_top_25	Null	0.0285473
default mode	subcortical_top_3	Experimental	0.134459
default mode	subcortical_top_3	Null	0.0285474
default mode	subcortical_top_5	Experimental	0.112088
default mode	subcortical_top_5	Null	0.0303779
default mode	subcortical_top_50	Experimental	0.0664606
default mode	subcortical_top_50	Null	0.0346501
default mode	visual A_top_10	Experimental	0.0697969
default mode	visual A_top_10	Null	0.0222684
default mode	visual A_top_15	Experimental	0.0423152
default mode	visual A_top_15	Null	0.0275503
default mode	visual A_top_20	Experimental	0.0330885
default mode	visual A_top_20	Null	0.0328427
default mode	visual A_top_25	Experimental	0.00750365
default mode	visual A_top_25	Null	0.0270788
default mode	visual A_top_3	Experimental	0.0228016
default mode	visual A_top_3	Null	0.0301012
default mode	visual A_top_5	Experimental	0.122858
default mode	visual A_top_5	Null	0.0273694
default mode	visual A_top_50	Experimental	0.02192
default mode	visual A_top_50	Null	0.0336348
default mode	visual B_top_10	Experimental	0.017452
default mode	visual B_top_10	Null	0.0368307
default mode	visual B_top_15	Experimental	0.008435
default mode	visual B_top_15	Null	0.0363117
default mode	visual B_top_20	Experimental	0.0137885
default mode	visual B_top_20	Null	0.028962
default mode	visual B_top_25	Experimental	0.012117
default mode	visual B_top_25	Null	0.0327232
default mode	visual B_top_3	Experimental	0.0118554
default mode	visual B_top_3	Null	0.0337168
default mode	visual B_top_5	Experimental	0.016949
default mode	visual B_top_5	Null	0.0364525
default mode	visual B_top_50	Experimental	0.00935906
default mode	visual B_top_50	Null	0.0286902
default mode	visual association_top_10	Experimental	0.00684881
default mode	visual association_top_10	Null	0.0414018
default mode	visual association_top_15	Experimental	0.000154929
default mode	visual association_top_15	Null	0.0303577
default mode	visual association_top_20	Experimental	0.000174019
default mode	visual association_top_20	Null	0.0221009
default mode	visual association_top_25	Experimental	4.43311e-06
default mode	visual association_top_25	Null	0.0311739
default mode	visual association_top_3	Experimental	0.0770152
default mode	visual association_top_3	Null	0.0361154
default mode	visual association_top_5	Experimental	0.0211129
default mode	visual association_top_5	Null	0.0314453
default mode	visual association_top_50	Experimental	0.00130186
default mode	visual association_top_50	Null	0.0270923
frontoparietal	cerebellum_top_10	Experimental	0.0481
frontoparietal	cerebellum_top_10	Null	0.0270777
frontoparietal	cerebellum_top_15	Experimental	0.0523072
frontoparietal	cerebellum_top_15	Null	0.0365501
frontoparietal	cerebellum_top_20	Experimental	0.0663882
frontoparietal	cerebellum_top_20	Null	0.0288175
frontoparietal	cerebellum_top_25	Experimental	0.0637887
frontoparietal	cerebellum_top_25	Null	0.0335302
frontoparietal	cerebellum_top_3	Experimental	0.00975315
frontoparietal	cerebellum_top_3	Null	0.0368284
frontoparietal	cerebellum_top_5	Experimental	0.0373081
frontoparietal	cerebellum_top_5	Null	0.0385092
frontoparietal	cerebellum_top_50	Experimental	0.0764359
frontoparietal	cerebellum_top_50	Null	0.0329983
frontoparietal	default mode_top_10	Experimental	0.0776946
frontoparietal	default mode_top_10	Null	0.0259732
frontoparietal	default mode_top_15	Experimental	0.0859011
frontoparietal	default mode_top_15	Null	0.0318975
frontoparietal	default mode_top_20	Experimental	0.0780591
frontoparietal	default mode_top_20	Null	0.0311796
frontoparietal	default mode_top_25	Experimental	0.0619133
frontoparietal	default mode_top_25	Null	0.0398837
frontoparietal	default mode_top_3	Experimental	0.0357694
frontoparietal	default mode_top_3	Null	0.0309052
frontoparietal	default mode_top_5	Experimental	0.127628
frontoparietal	default mode_top_5	Null	0.0286453
frontoparietal	default mode_top_50	Experimental	0.0648456
frontoparietal	default mode_top_50	Null	0.0247815
frontoparietal	frontoparietal_top_10	Experimental	0.221234
frontoparietal	frontoparietal_top_10	Null	0.0286488
frontoparietal	frontoparietal_top_15	Experimental	0.213031
frontoparietal	frontoparietal_top_15	Null	0.0424945
frontoparietal	frontoparietal_top_20	Experimental	0.198815
frontoparietal	frontoparietal_top_20	Null	0.02971
frontoparietal	frontoparietal_top_25	Experimental	0.145835
frontoparietal	frontoparietal_top_25	Null	0.0254624
frontoparietal	frontoparietal_top_3	Experimental	0.263921
frontoparietal	frontoparietal_top_3	Null	0.0241455
frontoparietal	frontoparietal_top_5	Experimental	0.235812
frontoparietal	frontoparietal_top_5	Null	0.0398925
frontoparietal	frontoparietal_top_50	Experimental	0.152108
frontoparietal	frontoparietal_top_50	Null	0.0250075
frontoparietal	medial frontal_top_10	Experimental	0.0848854
frontoparietal	medial frontal_top_10	Null	0.0286531
frontoparietal	medial frontal_top_15	Experimental	0.0862744
frontoparietal	medial frontal_top_15	Null	0.0281717
frontoparietal	medial frontal_top_20	Experimental	0.0810456
frontoparietal	medial frontal_top_20	Null	0.0352984
frontoparietal	medial frontal_top_25	Experimental	0.0694489
frontoparietal	medial frontal_top_25	Null	0.0261696
frontoparietal	medial frontal_top_3	Experimental	0.0623339
frontoparietal	medial frontal_top_3	Null	0.0298551
frontoparietal	medial frontal_top_5	Experimental	0.0751954
frontoparietal	medial frontal_top_5	Null	0.0291139
frontoparietal	medial frontal_top_50	Experimental	0.0881135
frontoparietal	medial frontal_top_50	Null	0.0333509
frontoparietal	motor cortex_top_10	Experimental	0.0220275
frontoparietal	motor cortex_top_10	Null	0.0332265
frontoparietal	motor cortex_top_15	Experimental	0.0516858
frontoparietal	motor cortex_top_15	Null	0.0347522
frontoparietal	motor cortex_top_20	Experimental	0.0295914
frontoparietal	motor cortex_top_20	Null	0.033277
frontoparietal	motor cortex_top_25	Experimental	0.0435818
frontoparietal	motor cortex_top_25	Null	0.0351524
frontoparietal	motor cortex_top_3	Experimental	0.0756334
frontoparietal	motor cortex_top_3	Null	0.0259809
frontoparietal	motor cortex_top_5	Experimental	0.000250293
frontoparietal	motor cortex_top_5	Null	0.0279921
frontoparietal	motor cortex_top_50	Experimental	0.0547262
frontoparietal	motor cortex_top_50	Null	0.0244108
frontoparietal	salience_top_10	Experimental	0.0701502
frontoparietal	salience_top_10	Null	0.0256264
frontoparietal	salience_top_15	Experimental	0.0804857
frontoparietal	salience_top_15	Null	0.0296366
frontoparietal	salience_top_20	Experimental	0.11884
frontoparietal	salience_top_20	Null	0.031074
frontoparietal	salience_top_25	Experimental	0.0983702
frontoparietal	salience_top_25	Null	0.0302377
frontoparietal	salience_top_3	Experimental	0.0938586
frontoparietal	salience_top_3	Null	0.0319274
frontoparietal	salience_top_5	Experimental	0.083239
frontoparietal	salience_top_5	Null	0.0333252
frontoparietal	salience_top_50	Experimental	0.117272
frontoparietal	salience_top_50	Null	0.0258009
frontoparietal	subcortical_top_10	Experimental	0.0281846
frontoparietal	subcortical_top_10	Null	0.0285138
frontoparietal	subcortical_top_15	Experimental	0.00359123
frontoparietal	subcortical_top_15	Null	0.0362123
frontoparietal	subcortical_top_20	Experimental	0.0269826
frontoparietal	subcortical_top_20	Null	0.0373184
frontoparietal	subcortical_top_25	Experimental	0.00786079
frontoparietal	subcortical_top_25	Null	0.0342861
frontoparietal	subcortical_top_3	Experimental	0.0457564
frontoparietal	subcortical_top_3	Null	0.0315466
frontoparietal	subcortical_top_5	Experimental	0.0210897
frontoparietal	subcortical_top_5	Null	0.0294919
frontoparietal	subcortical_top_50	Experimental	0.0717949
frontoparietal	subcortical_top_50	Null	0.0386412
frontoparietal	visual A_top_10	Experimental	0.0272173
frontoparietal	visual A_top_10	Null	0.0299766
frontoparietal	visual A_top_15	Experimental	0.0257091
frontoparietal	visual A_top_15	Null	0.0320249
frontoparietal	visual A_top_20	Experimental	0.0661793
frontoparietal	visual A_top_20	Null	0.0361522
frontoparietal	visual A_top_25	Experimental	0.0348917
frontoparietal	visual A_top_25	Null	0.0267547
frontoparietal	visual A_top_3	Experimental	0.0925449
frontoparietal	visual A_top_3	Null	0.0365781
frontoparietal	visual A_top_5	Experimental	0.10922
frontoparietal	visual A_top_5	Null	0.0253086
frontoparietal	visual A_top_50	Experimental	0.0340921
frontoparietal	visual A_top_50	Null	0.0280236
frontoparietal	visual B_top_10	Experimental	0.0385983
frontoparietal	visual B_top_10	Null	0.031546
frontoparietal	visual B_top_15	Experimental	0.0362402
frontoparietal	visual B_top_15	Null	0.0329164
frontoparietal	visual B_top_20	Experimental	0.0331322
frontoparietal	visual B_top_20	Null	0.0277524
frontoparietal	visual B_top_25	Experimental	0.0319113
frontoparietal	visual B_top_25	Null	0.0355188
frontoparietal	visual B_top_3	Experimental	0.0801488
frontoparietal	visual B_top_3	Null	0.0299239
frontoparietal	visual B_top_5	Experimental	0.0249811
frontoparietal	visual B_top_5	Null	0.0328274
frontoparietal	visual B_top_50	Experimental	0.0306121
frontoparietal	visual B_top_50	Null	0.0409994
frontoparietal	visual association_top_10	Experimental	0.0454901
frontoparietal	visual association_top_10	Null	0.0339652
frontoparietal	visual association_top_15	Experimental	0.0238121
frontoparietal	visual association_top_15	Null	0.0317067
frontoparietal	visual association_top_20	Experimental	0.0217243
frontoparietal	visual association_top_20	Null	0.0233001
frontoparietal	visual association_top_25	Experimental	0.0354666
frontoparietal	visual association_top_25	Null	0.0404192
frontoparietal	visual association_top_3	Experimental	0.00690546
frontoparietal	visual association_top_3	Null	0.0354257
frontoparietal	visual association_top_5	Experimental	0.092044
frontoparietal	visual association_top_5	Null	0.0294218
frontoparietal	visual association_top_50	Experimental	0.0423198
frontoparietal	visual association_top_50	Null	0.0250498
medial frontal	cerebellum_top_10	Experimental	0.135362
medial frontal	cerebellum_top_10	Null	0.0348803
medial frontal	cerebellum_top_15	Experimental	0.174582
medial frontal	cerebellum_top_15	Null	0.0303743
medial frontal	cerebellum_top_20	Experimental	0.175466
medial frontal	cerebellum_top_20	Null	0.0380133
medial frontal	cerebellum_top_25	Experimental	0.193376
medial frontal	cerebellum_top_25	Null	0.028758
medial frontal	cerebellum_top_3	Experimental	0.0358077
medial frontal	cerebellum_top_3	Null	0.0284523
medial frontal	cerebellum_top_5	Experimental	0.12553
medial frontal	cerebellum_top_5	Null	0.0274817
medial frontal	cerebellum_top_50	Experimental	0.19584
medial frontal	cerebellum_top_50	Null	0.0362966
medial frontal	default mode_top_10	Experimental	0.28136
medial frontal	default mode_top_10	Null	0.030601
medial frontal	default mode_top_15	Experimental	0.265359
medial frontal	default mode_top_15	Null	0.0375144
medial frontal	default mode_top_20	Experimental	0.251741
medial frontal	default mode_top_20	Null	0.0308969
medial frontal	default mode_top_25	Experimental	0.198196
medial frontal	default mode_top_25	Null	0.0383967
medial frontal	default mode_top_3	Experimental	0.1184
medial frontal	default mode_top_3	Null	0.0342109
medial frontal	default mode_top_5	Experimental	0.229272
medial frontal	default mode_top_5	Null	0.0334124
medial frontal	default mode_top_50	Experimental	0.170696
medial frontal	default mode_top_50	Null	0.0351087
medial frontal	frontoparietal_top_10	Experimental	0.256273
medial frontal	frontoparietal_top_10	Null	0.0258972
medial frontal	frontoparietal_top_15	Experimental	0.213013
medial frontal	frontoparietal_top_15	Null	0.0348109
medial frontal	frontoparietal_top_20	Experimental	0.19109
medial frontal	frontoparietal_top_20	Null	0.0401714
medial frontal	frontoparietal_top_25	Experimental	0.185449
medial frontal	frontoparietal_top_25	Null	0.0367309
medial frontal	frontoparietal_top_3	Experimental	0.130986
medial frontal	frontoparietal_top_3	Null	0.0396016
medial frontal	frontoparietal_top_5	Experimental	0.171246
medial frontal	frontoparietal_top_5	Null	0.0354286
medial frontal	frontoparietal_top_50	Experimental	0.194027
medial frontal	frontoparietal_top_50	Null	0.0336051
medial frontal	medial frontal_top_10	Experimental	0.356024
medial frontal	medial frontal_top_10	Null	0.035774
medial frontal	medial frontal_top_15	Experimental	0.349459
medial frontal	medial frontal_top_15	Null	0.0295192
medial frontal	medial frontal_top_20	Experimental	0.325188
medial frontal	medial frontal_top_20	Null	0.0359169
medial frontal	medial frontal_top_25	Experimental	0.324387
medial frontal	medial frontal_top_25	Null	0.0373601
medial frontal	medial frontal_top_3	Experimental	0.300929
medial frontal	medial frontal_top_3	Null	0.0357314
medial frontal	medial frontal_top_5	Experimental	0.313794
medial frontal	medial frontal_top_5	Null	0.0358545
medial frontal	medial frontal_top_50	Experimental	0.317007
medial frontal	medial frontal_top_50	Null	0.0251143
medial frontal	motor cortex_top_10	Experimental	0.113602
medial frontal	motor cortex_top_10	Null	0.029348
medial frontal	motor cortex_top_15	Experimental	0.149592
medial frontal	motor cortex_top_15	Null	0.0362811
medial frontal	motor cortex_top_20	Experimental	0.127042
medial frontal	motor cortex_top_20	Null	0.032799
medial frontal	motor cortex_top_25	Experimental	0.163853
medial frontal	motor cortex_top_25	Null	0.02821
medial frontal	motor cortex_top_3	Experimental	0.0821119
medial frontal	motor cortex_top_3	Null	0.0272931
medial frontal	motor cortex_top_5	Experimental	0.0938796
medial frontal	motor cortex_top_5	Null	0.0277853
medial frontal	motor cortex_top_50	Experimental	0.149483
medial frontal	motor cortex_top_50	Null	0.0261212
medial frontal	salience_top_10	Experimental	0.212881
medial frontal	salience_top_10	Null	0.036798
medial frontal	salience_top_15	Experimental	0.214085
medial frontal	salience_top_15	Null	0.031599
medial frontal	salience_top_20	Experimental	0.203624
medial frontal	salience_top_20	Null	0.0316542
medial frontal	salience_top_25	Experimental	0.227193
medial frontal	salience_top_25	Null	0.0357492
medial frontal	salience_top_3	Experimental	0.274149
medial frontal	salience_top_3	Null	0.027192
medial frontal	salience_top_5	Experimental	0.290449
medial frontal	salience_top_5	Null	0.0356811
medial frontal	salience_top_50	Experimental	0.258636
medial frontal	salience_top_50	Null	0.0255723
medial frontal	subcortical_top_10	Experimental	0.160534
medial frontal	subcortical_top_10	Null	0.026273
medial frontal	subcortical_top_15	Experimental	0.152827
medial frontal	subcortical_top_15	Null	0.0322159
medial frontal	subcortical_top_20	Experimental	0.105792
medial frontal	subcortical_top_20	Null	0.0302796
medial frontal	subcortical_top_25	Experimental	0.171365
medial frontal	subcortical_top_25	Null	0.0261826
medial frontal	subcortical_top_3	Experimental	0.1613
medial frontal	subcortical_top_3	Null	0.0299294
medial frontal	subcortical_top_5	Experimental	0.184673
medial frontal	subcortical_top_5	Null	0.0429777
medial frontal	subcortical_top_50	Experimental	0.181343
medial frontal	subcortical_top_50	Null	0.0326277
medial frontal	visual A_top_10	Experimental	0.0419499
medial frontal	visual A_top_10	Null	0.0311241
medial frontal	visual A_top_15	Experimental	0.0775802
medial frontal	visual A_top_15	Null	0.0364894
medial frontal	visual A_top_20	Experimental	0.0679596
medial frontal	visual A_top_20	Null	0.033893
medial frontal	visual A_top_25	Experimental	0.0705223
medial frontal	visual A_top_25	Null	0.033891
medial frontal	visual A_top_3	Experimental	0.0110821
medial frontal	visual A_top_3	Null	0.032185
medial frontal	visual A_top_5	Experimental	0.126282
medial frontal	visual A_top_5	Null	0.0287505
medial frontal	visual A_top_50	Experimental	0.148112
medial frontal	visual A_top_50	Null	0.0316978
medial frontal	visual B_top_10	Experimental	0.191848
medial frontal	visual B_top_10	Null	0.0389754
medial frontal	visual B_top_15	Experimental	0.185933
medial frontal	visual B_top_15	Null	0.0361044
medial frontal	visual B_top_20	Experimental	0.185279
medial frontal	visual B_top_20	Null	0.0325848
medial frontal	visual B_top_25	Experimental	0.211325
medial frontal	visual B_top_25	Null	0.0333053
medial frontal	visual B_top_3	Experimental	0.169105
medial frontal	visual B_top_3	Null	0.0268911
medial frontal	visual B_top_5	Experimental	0.152202
medial frontal	visual B_top_5	Null	0.0334848
medial frontal	visual B_top_50	Experimental	0.177733
medial frontal	visual B_top_50	Null	0.0295193
medial frontal	visual association_top_10	Experimental	0.165052
medial frontal	visual association_top_10	Null	0.0329105
medial frontal	visual association_top_15	Experimental	0.163685
medial frontal	visual association_top_15	Null	0.0264433
medial frontal	visual association_top_20	Experimental	0.16886
medial frontal	visual association_top_20	Null	0.0313345
medial frontal	visual association_top_25	Experimental	0.153176
medial frontal	visual association_top_25	Null	0.0327382
medial frontal	visual association_top_3	Experimental	0.114921
medial frontal	visual association_top_3	Null	0.0340493
medial frontal	visual association_top_5	Experimental	0.149241
medial frontal	visual association_top_5	Null	0.0348848
medial frontal	visual association_top_50	Experimental	0.178816
medial frontal	visual association_top_50	Null	0.0335271
motor cortex	cerebellum_top_10	Experimental	0.134662
motor cortex	cerebellum_top_10	Null	0.0279076
motor cortex	cerebellum_top_15	Experimental	0.13286
motor cortex	cerebellum_top_15	Null	0.0260508
motor cortex	cerebellum_top_20	Experimental	0.123676
motor cortex	cerebellum_top_20	Null	0.0260912
motor cortex	cerebellum_top_25	Experimental	0.142509
motor cortex	cerebellum_top_25	Null	0.036489
motor cortex	cerebellum_top_3	Experimental	0.0459294
motor cortex	cerebellum_top_3	Null	0.0292456
motor cortex	cerebellum_top_5	Experimental	0.0483925
motor cortex	cerebellum_top_5	Null	0.0329312
motor cortex	cerebellum_top_50	Experimental	0.159765
motor cortex	cerebellum_top_50	Null	0.0274111
motor cortex	default mode_top_10	Experimental	0.0732052
motor cortex	default mode_top_10	Null	0.0329465
motor cortex	default mode_top_15	Experimental	0.107785
motor cortex	default mode_top_15	Null	0.0380605
motor cortex	default mode_top_20	Experimental	0.143472
motor cortex	default mode_top_20	Null	0.0301603
motor cortex	default mode_top_25	Experimental	0.148227
motor cortex	default mode_top_25	Null	0.0348834
motor cortex	default mode_top_3	Experimental	0.0400843
motor cortex	default mode_top_3	Null	0.034227
motor cortex	default mode_top_5	Experimental	0.0150811
motor cortex	default mode_top_5	Null	0.0325342
motor cortex	default mode_top_50	Experimental	0.149521
motor cortex	default mode_top_50	Null	0.0346952
motor cortex	frontoparietal_top_10	Experimental	0.209611
motor cortex	frontoparietal_top_10	Null	0.0288092
motor cortex	frontoparietal_top_15	Experimental	0.163314
motor cortex	frontoparietal_top_15	Null	0.0381362
motor cortex	frontoparietal_top_20	Experimental	0.177659
motor cortex	frontoparietal_top_20	Null	0.0295116
motor cortex	frontoparietal_top_25	Experimental	0.163449
motor cortex	frontoparietal_top_25	Null	0.0306099
motor cortex	frontoparietal_top_3	Experimental	0.241247
motor cortex	frontoparietal_top_3	Null	0.029135
motor cortex	frontoparietal_top_5	Experimental	0.242555
motor cortex	frontoparietal_top_5	Null	0.020549
motor cortex	frontoparietal_top_50	Experimental	0.162367
motor cortex	frontoparietal_top_50	Null	0.0298026
motor cortex	medial frontal_top_10	Experimental	0.119928
motor cortex	medial frontal_top_10	Null	0.0327873
motor cortex	medial frontal_top_15	Experimental	0.120949
motor cortex	medial frontal_top_15	Null	0.0292589
motor cortex	medial frontal_top_20	Experimental	0.123457
motor cortex	medial frontal_top_20	Null	0.0269555
motor cortex	medial frontal_top_25	Experimental	0.133502
motor cortex	medial frontal_top_25	Null	0.0356637
motor cortex	medial frontal_top_3	Experimental	0.0972112
motor cortex	medial frontal_top_3	Null	0.0322276
motor cortex	medial frontal_top_5	Experimental	0.111911
motor cortex	medial frontal_top_5	Null	0.0256744
motor cortex	medial frontal_top_50	Experimental	0.0962382
motor cortex	medial frontal_top_50	Null	0.0331557
motor cortex	motor cortex_top_10	Experimental	0.300134
motor cortex	motor cortex_top_10	Null	0.0398432
motor cortex	motor cortex_top_15	Experimental	0.316251
motor cortex	motor cortex_top_15	Null	0.0213704
motor cortex	motor cortex_top_20	Experimental	0.293191
motor cortex	motor cortex_top_20	Null	0.0377882
motor cortex	motor cortex_top_25	Experimental	0.285163
motor cortex	motor cortex_top_25	Null	0.0249807
motor cortex	motor cortex_top_3	Experimental	0.27315
motor cortex	motor cortex_top_3	Null	0.0190765
motor cortex	motor cortex_top_5	Experimental	0.298817
motor cortex	motor cortex_top_5	Null	0.028365
motor cortex	motor cortex_top_50	Experimental	0.256331
motor cortex	motor cortex_top_50	Null	0.030397
motor cortex	salience_top_10	Experimental	0.151587
motor cortex	salience_top_10	Null	0.0287201
motor cortex	salience_top_15	Experimental	0.132068
motor cortex	salience_top_15	Null	0.0265242
motor cortex	salience_top_20	Experimental	0.158252
motor cortex	salience_top_20	Null	0.0379838
motor cortex	salience_top_25	Experimental	0.157855
motor cortex	salience_top_25	Null	0.0234996
motor cortex	salience_top_3	Experimental	0.0643014
motor cortex	salience_top_3	Null	0.0253068
motor cortex	salience_top_5	Experimental	0.102461
motor cortex	salience_top_5	Null	0.0329064
motor cortex	salience_top_50	Experimental	0.140965
motor cortex	salience_top_50	Null	0.0271484
motor cortex	subcortical_top_10	Experimental	0.186484
motor cortex	subcortical_top_10	Null	0.0311733
motor cortex	subcortical_top_15	Experimental	0.115849
motor cortex	subcortical_top_15	Null	0.0307011
motor cortex	subcortical_top_20	Experimental	0.184306
motor cortex	subcortical_top_20	Null	0.0353157
motor cortex	subcortical_top_25	Experimental	0.153611
motor cortex	subcortical_top_25	Null	0.0366933
motor cortex	subcortical_top_3	Experimental	0.136912
motor cortex	subcortical_top_3	Null	0.0279868
motor cortex	subcortical_top_5	Experimental	0.139735
motor cortex	subcortical_top_5	Null	0.0242546
motor cortex	subcortical_top_50	Experimental	0.197801
motor cortex	subcortical_top_50	Null	0.0258037
motor cortex	visual A_top_10	Experimental	0.109291
motor cortex	visual A_top_10	Null	0.027026
motor cortex	visual A_top_15	Experimental	0.115622
motor cortex	visual A_top_15	Null	0.0337728
motor cortex	visual A_top_20	Experimental	0.121843
motor cortex	visual A_top_20	Null	0.0290816
motor cortex	visual A_top_25	Experimental	0.110802
motor cortex	visual A_top_25	Null	0.0353141
motor cortex	visual A_top_3	Experimental	0.0108699
motor cortex	visual A_top_3	Null	0.0303883
motor cortex	visual A_top_5	Experimental	0.0645606
motor cortex	visual A_top_5	Null	0.0326002
motor cortex	visual A_top_50	Experimental	0.110673
motor cortex	visual A_top_50	Null	0.0231555
motor cortex	visual B_top_10	Experimental	0.139137
motor cortex	visual B_top_10	Null	0.040463
motor cortex	visual B_top_15	Experimental	0.120602
motor cortex	visual B_top_15	Null	0.0358308
motor cortex	visual B_top_20	Experimental	0.133559
motor cortex	visual B_top_20	Null	0.0393377
motor cortex	visual B_top_25	Experimental	0.143031
motor cortex	visual B_top_25	Null	0.0347552
motor cortex	visual B_top_3	Experimental	0.0794257
motor cortex	visual B_top_3	Null	0.0384315
motor cortex	visual B_top_5	Experimental	0.114712
motor cortex	visual B_top_5	Null	0.0332583
motor cortex	visual B_top_50	Experimental	0.164689
motor cortex	visual B_top_50	Null	0.0307159
motor cortex	visual association_top_10	Experimental	0.143538
motor cortex	visual association_top_10	Null	0.03323
motor cortex	visual association_top_15	Experimental	0.119792
motor cortex	visual association_top_15	Null	0.0320934
motor cortex	visual association_top_20	Experimental	0.126009
motor cortex	visual association_top_20	Null	0.0374325
motor cortex	visual association_top_25	Experimental	0.137493
motor cortex	visual association_top_25	Null	0.0255449
motor cortex	visual association_top_3	Experimental	0.117618
motor cortex	visual association_top_3	Null	0.0325161
motor cortex	visual association_top_5	Experimental	0.0821515
motor cortex	visual association_top_5	Null	0.0319166
motor cortex	visual association_top_50	Experimental	0.13905
motor cortex	visual association_top_50	Null	0.0381341
salience	cerebellum_top_10	Experimental	0.0444414
salience	cerebellum_top_10	Null	0.0382191
salience	cerebellum_top_15	Experimental	0.00358427
salience	cerebellum_top_15	Null	0.0290874
salience	cerebellum_top_20	Experimental	0.0183101
salience	cerebellum_top_20	Null	0.0384455
salience	cerebellum_top_25	Experimental	0.0174837
salience	cerebellum_top_25	Null	0.0248629
salience	cerebellum_top_3	Experimental	0.0326438
salience	cerebellum_top_3	Null	0.0299352
salience	cerebellum_top_5	Experimental	0.0049363
salience	cerebellum_top_5	Null	0.028602
salience	cerebellum_top_50	Experimental	0.00274937
salience	cerebellum_top_50	Null	0.0251801
salience	default mode_top_10	Experimental	0.0309561
salience	default mode_top_10	Null	0.0347689
salience	default mode_top_15	Experimental	0.0714525
salience	default mode_top_15	Null	0.027686
salience	default mode_top_20	Experimental	0.078177
salience	default mode_top_20	Null	0.0346812
salience	default mode_top_25	Experimental	0.0890286
salience	default mode_top_25	Null	0.0339478
salience	default mode_top_3	Experimental	0.000908486
salience	default mode_top_3	Null	0.0276524
salience	default mode_top_5	Experimental	0.000348453
salience	default mode_top_5	Null	0.0332219
salience	default mode_top_50	Experimental	0.033143
salience	default mode_top_50	Null	0.0298433
salience	frontoparietal_top_10	Experimental	0.0641802
salience	frontoparietal_top_10	Null	0.0339654
salience	frontoparietal_top_15	Experimental	0.0430702
salience	frontoparietal_top_15	Null	0.0236347
salience	frontoparietal_top_20	Experimental	0.0198952
salience	frontoparietal_top_20	Null	0.0288633
salience	frontoparietal_top_25	Experimental	0.0116563
salience	frontoparietal_top_25	Null	0.0329292
salience	frontoparietal_top_3	Experimental	0.0940754
salience	frontoparietal_top_3	Null	0.0275073
salience	frontoparietal_top_5	Experimental	0.0326459
salience	frontoparietal_top_5	Null	0.0332994
salience	frontoparietal_top_50	Experimental	0.0301282
salience	frontoparietal_top_50	Null	0.0352409
salience	medial frontal_top_10	Experimental	0.0402144
salience	medial frontal_top_10	Null	0.0268973
salience	medial frontal_top_15	Experimental	0.0708717
salience	medial frontal_top_15	Null	0.0391246
salience	medial frontal_top_20	Experimental	0.0769146
salience	medial frontal_top_20	Null	0.0308815
salience	medial frontal_top_25	Experimental	0.0743742
salience	medial frontal_top_25	Null	0.0273826
salience	medial frontal_top_3	Experimental	0.0881546
salience	medial frontal_top_3	Null	0.0345193
salience	medial frontal_top_5	Experimental	0.0950245
salience	medial frontal_top_5	Null	0.0251961
salience	medial frontal_top_50	Experimental	0.0554085
salience	medial frontal_top_50	Null	0.0339211
salience	motor cortex_top_10	Experimental	0.0234958
salience	motor cortex_top_10	Null	0.033035
salience	motor cortex_top_15	Experimental	0.0237921
salience	motor cortex_top_15	Null	0.0356911
salience	motor cortex_top_20	Experimental	0.0410141
salience	motor cortex_top_20	Null	0.034944
salience	motor cortex_top_25	Experimental	0.0154672
salience	motor cortex_top_25	Null	0.0346266
salience	motor cortex_top_3	Experimental	0.103056
salience	motor cortex_top_3	Null	0.0258844
salience	motor cortex_top_5	Experimental	0.0995619
salience	motor cortex_top_5	Null	0.034169
salience	motor cortex_top_50	Experimental	0.016149
salience	motor cortex_top_50	Null	0.0338925
salience	salience_top_10	Experimental	0.273903
salience	salience_top_10	Null	0.0267786
salience	salience_top_15	Experimental	0.252575
salience	salience_top_15	Null	0.0314174
salience	salience_top_20	Experimental	0.18351
salience	salience_top_20	Null	0.0367105
salience	salience_top_25	Experimental	0.207551
salience	salience_top_25	Null	0.0335918
salience	salience_top_3	Experimental	0.274615
salience	salience_top_3	Null	0.0305471
salience	salience_top_5	Experimental	0.256212
salience	salience_top_5	Null	0.031276
salience	salience_top_50	Experimental	0.144323
salience	salience_top_50	Null	0.0275736
salience	subcortical_top_10	Experimental	7.12198e-05
salience	subcortical_top_10	Null	0.0297154
salience	subcortical_top_15	Experimental	6.38662e-05
salience	subcortical_top_15	Null	0.0312214
salience	subcortical_top_20	Experimental	0.0101824
salience	subcortical_top_20	Null	0.036349
salience	subcortical_top_25	Experimental	0.00261947
salience	subcortical_top_25	Null	0.0246976
salience	subcortical_top_3	Experimental	0.00324932
salience	subcortical_top_3	Null	0.0330153
salience	subcortical_top_5	Experimental	0.00159772
salience	subcortical_top_5	Null	0.0316791
salience	subcortical_top_50	Experimental	0.0205067
salience	subcortical_top_50	Null	0.0329915
salience	visual A_top_10	Experimental	0.10766
salience	visual A_top_10	Null	0.0330241
salience	visual A_top_15	Experimental	0.0928864
salience	visual A_top_15	Null	0.0277171
salience	visual A_top_20	Experimental	0.0584239
salience	visual A_top_20	Null	0.0342652
salience	visual A_top_25	Experimental	0.017879
salience	visual A_top_25	Null	0.0335699
salience	visual A_top_3	Experimental	0
salience	visual A_top_3	Null	0.0295965
salience	visual A_top_5	Experimental	0.091819
salience	visual A_top_5	Null	0.0392612
salience	visual A_top_50	Experimental	0.0453874
salience	visual A_top_50	Null	0.0315122
salience	visual B_top_10	Experimental	0.0271157
salience	visual B_top_10	Null	0.0289477
salience	visual B_top_15	Experimental	0.0241198
salience	visual B_top_15	Null	0.0237463
salience	visual B_top_20	Experimental	0.0393062
salience	visual B_top_20	Null	0.0303483
salience	visual B_top_25	Experimental	0.023464
salience	visual B_top_25	Null	0.0282128
salience	visual B_top_3	Experimental	0.00432244
salience	visual B_top_3	Null	0.0370121
salience	visual B_top_5	Experimental	0.0271031
salience	visual B_top_5	Null	0.0277971
salience	visual B_top_50	Experimental	0.0195941
salience	visual B_top_50	Null	0.0305239
salience	visual association_top_10	Experimental	0.00780629
salience	visual association_top_10	Null	0.0369457
salience	visual association_top_15	Experimental	0.00142434
salience	visual association_top_15	Null	0.031492
salience	visual association_top_20	Experimental	0.00340164
salience	visual association_top_20	Null	0.0316448
salience	visual association_top_25	Experimental	0.00530606
salience	visual association_top_25	Null	0.0307075
salience	visual association_top_3	Experimental	0
salience	visual association_top_3	Null	0.0268455
salience	visual association_top_5	Experimental	0.000228513
salience	visual association_top_5	Null	0.0273072
salience	visual association_top_50	Experimental	0.00193257
salience	visual association_top_50	Null	0.0357934
subcortical	cerebellum_top_10	Experimental	0.0276392
subcortical	cerebellum_top_10	Null	0.0339209
subcortical	cerebellum_top_15	Experimental	0.114804
subcortical	cerebellum_top_15	Null	0.0302742
subcortical	cerebellum_top_20	Experimental	0.13533
subcortical	cerebellum_top_20	Null	0.0319013
subcortical	cerebellum_top_25	Experimental	0.130093
subcortical	cerebellum_top_25	Null	0.0337152
subcortical	cerebellum_top_3	Experimental	0.0169353
subcortical	cerebellum_top_3	Null	0.0277674
subcortical	cerebellum_top_5	Experimental	0.0424321
subcortical	cerebellum_top_5	Null	0.0342371
subcortical	cerebellum_top_50	Experimental	0.0961288
subcortical	cerebellum_top_50	Null	0.0309367
subcortical	default mode_top_10	Experimental	0.129734
subcortical	default mode_top_10	Null	0.0342593
subcortical	default mode_top_15	Experimental	0.0981029
subcortical	default mode_top_15	Null	0.0285016
subcortical	default mode_top_20	Experimental	0.103103
subcortical	default mode_top_20	Null	0.0340493
subcortical	default mode_top_25	Experimental	0.100685
subcortical	default mode_top_25	Null	0.0337873
subcortical	default mode_top_3	Experimental	0.178756
subcortical	default mode_top_3	Null	0.0323001
subcortical	default mode_top_5	Experimental	0.094328
subcortical	default mode_top_5	Null	0.0220664
subcortical	default mode_top_50	Experimental	0.0410281
subcortical	default mode_top_50	Null	0.023843
subcortical	frontoparietal_top_10	Experimental	0.0176686
subcortical	frontoparietal_top_10	Null	0.0293176
subcortical	frontoparietal_top_15	Experimental	0.0447423
subcortical	frontoparietal_top_15	Null	0.036845
subcortical	frontoparietal_top_20	Experimental	0.0485754
subcortical	frontoparietal_top_20	Null	0.0295579
subcortical	frontoparietal_top_25	Experimental	0.0514322
subcortical	frontoparietal_top_25	Null	0.0300214
subcortical	frontoparietal_top_3	Experimental	0.0125395
subcortical	frontoparietal_top_3	Null	0.0290823
subcortical	frontoparietal_top_5	Experimental	9.33278e-05
subcortical	frontoparietal_top_5	Null	0.0260605
subcortical	frontoparietal_top_50	Experimental	0.0284147
subcortical	frontoparietal_top_50	Null	0.0321717
subcortical	medial frontal_top_10	Experimental	0.0242701
subcortical	medial frontal_top_10	Null	0.0238923
subcortical	medial frontal_top_15	Experimental	0.0319089
subcortical	medial frontal_top_15	Null	0.0257717
subcortical	medial frontal_top_20	Experimental	0.0477396
subcortical	medial frontal_top_20	Null	0.0214118
subcortical	medial frontal_top_25	Experimental	0.0181694
subcortical	medial frontal_top_25	Null	0.0264112
subcortical	medial frontal_top_3	Experimental	0.052929
subcortical	medial frontal_top_3	Null	0.0306076
subcortical	medial frontal_top_5	Experimental	0.0699621
subcortical	medial frontal_top_5	Null	0.0304326
subcortical	medial frontal_top_50	Experimental	0.0473905
subcortical	medial frontal_top_50	Null	0.0303569
subcortical	motor cortex_top_10	Experimental	0.160203
subcortical	motor cortex_top_10	Null	0.0283898
subcortical	motor cortex_top_15	Experimental	0.146877
subcortical	motor cortex_top_15	Null	0.032608
subcortical	motor cortex_top_20	Experimental	0.0992373
subcortical	motor cortex_top_20	Null	0.039154
subcortical	motor cortex_top_25	Experimental	0.0726811
subcortical	motor cortex_top_25	Null	0.0296195
subcortical	motor cortex_top_3	Experimental	0.00737349
subcortical	motor cortex_top_3	Null	0.0218474
subcortical	motor cortex_top_5	Experimental	0.075904
subcortical	motor cortex_top_5	Null	0.0250128
subcortical	motor cortex_top_50	Experimental	0.0571704
subcortical	motor cortex_top_50	Null	0.0388963
subcortical	salience_top_10	Experimental	0.0182339
subcortical	salience_top_10	Null	0.0328462
subcortical	salience_top_15	Experimental	0.0709003
subcortical	salience_top_15	Null	0.0321768
subcortical	salience_top_20	Experimental	0.0974841
subcortical	salience_top_20	Null	0.034344
subcortical	salience_top_25	Experimental	0.0700071
subcortical	salience_top_25	Null	0.0424155
subcortical	salience_top_3	Experimental	0.0632046
subcortical	salience_top_3	Null	0.0340745
subcortical	salience_top_5	Experimental	0.038704
subcortical	salience_top_5	Null	0.0349554
subcortical	salience_top_50	Experimental	0.0478063
subcortical	salience_top_50	Null	0.0386957
subcortical	subcortical_top_10	Experimental	0.272397
subcortical	subcortical_top_10	Null	0.0294565
subcortical	subcortical_top_15	Experimental	0.276497
subcortical	subcortical_top_15	Null	0.0373086
subcortical	subcortical_top_20	Experimental	0.271709
subcortical	subcortical_top_20	Null	0.0390306
subcortical	subcortical_top_25	Experimental	0.277539
subcortical	subcortical_top_25	Null	0.0352919
subcortical	subcortical_top_3	Experimental	0.182813
subcortical	subcortical_top_3	Null	0.0315723
subcortical	subcortical_top_5	Experimental	0.274147
subcortical	subcortical_top_5	Null	0.0268387
subcortical	subcortical_top_50	Experimental	0.217601
subcortical	subcortical_top_50	Null	0.0318014
subcortical	visual A_top_10	Experimental	0.160774
subcortical	visual A_top_10	Null	0.0339782
subcortical	visual A_top_15	Experimental	0.110819
subcortical	visual A_top_15	Null	0.0310882
subcortical	visual A_top_20	Experimental	0.0312992
subcortical	visual A_top_20	Null	0.0382803
subcortical	visual A_top_25	Experimental	0.0309456
subcortical	visual A_top_25	Null	0.0361171
subcortical	visual A_top_3	Experimental	0
subcortical	visual A_top_3	Null	0.0299654
subcortical	visual A_top_5	Experimental	0.0083315
subcortical	visual A_top_5	Null	0.0320618
subcortical	visual A_top_50	Experimental	0.0579458
subcortical	visual A_top_50	Null	0.040618
subcortical	visual B_top_10	Experimental	0.0471955
subcortical	visual B_top_10	Null	0.0320476
subcortical	visual B_top_15	Experimental	0.0627169
subcortical	visual B_top_15	Null	0.035239
subcortical	visual B_top_20	Experimental	0.0723202
subcortical	visual B_top_20	Null	0.0271813
subcortical	visual B_top_25	Experimental	0.0491601
subcortical	visual B_top_25	Null	0.0327432
subcortical	visual B_top_3	Experimental	0.0379803
subcortical	visual B_top_3	Null	0.0356865
subcortical	visual B_top_5	Experimental	0.0758113
subcortical	visual B_top_5	Null	0.0289737
subcortical	visual B_top_50	Experimental	0.0718711
subcortical	visual B_top_50	Null	0.0363706
subcortical	visual association_top_10	Experimental	0.00746646
subcortical	visual association_top_10	Null	0.0335399
subcortical	visual association_top_15	Experimental	0.0199403
subcortical	visual association_top_15	Null	0.0315335
subcortical	visual association_top_20	Experimental	0.03901
subcortical	visual association_top_20	Null	0.0309082
subcortical	visual association_top_25	Experimental	0.0232181
subcortical	visual association_top_25	Null	0.0323832
subcortical	visual association_top_3	Experimental	0.000712054
subcortical	visual association_top_3	Null	0.0241514
subcortical	visual association_top_5	Experimental	0.0257458
subcortical	visual association_top_5	Null	0.0338968
subcortical	visual association_top_50	Experimental	0.029785
subcortical	visual association_top_50	Null	0.0254199
visual A	cerebellum_top_10	Experimental	0
visual A	cerebellum_top_10	Null	0.030352
visual A	cerebellum_top_15	Experimental	0
visual A	cerebellum_top_15	Null	0.0371889
visual A	cerebellum_top_20	Experimental	0
visual A	cerebellum_top_20	Null	0.0311804
visual A	cerebellum_top_25	Experimental	0
visual A	cerebellum_top_25	Null	0.0260352
visual A	cerebellum_top_3	Experimental	0.00909087
visual A	cerebellum_top_3	Null	0.0314388
visual A	cerebellum_top_5	Experimental	0
visual A	cerebellum_top_5	Null	0.0369463
visual A	cerebellum_top_50	Experimental	0
visual A	cerebellum_top_50	Null	0.0343484
visual A	default mode_top_10	Experimental	0.00103793
visual A	default mode_top_10	Null	0.0350374
visual A	default mode_top_15	Experimental	7.66837e-05
visual A	default mode_top_15	Null	0.0344306
visual A	default mode_top_20	Experimental	0
visual A	default mode_top_20	Null	0.0318352
visual A	default mode_top_25	Experimental	0
visual A	default mode_top_25	Null	0.0291815
visual A	default mode_top_3	Experimental	0.10777
visual A	default mode_top_3	Null	0.037662
visual A	default mode_top_5	Experimental	0.0536197
visual A	default mode_top_5	Null	0.0422586
visual A	default mode_top_50	Experimental	0
visual A	default mode_top_50	Null	0.0296486
visual A	frontoparietal_top_10	Experimental	0
visual A	frontoparietal_top_10	Null	0.0297188
visual A	frontoparietal_top_15	Experimental	0
visual A	frontoparietal_top_15	Null	0.0295966
visual A	frontoparietal_top_20	Experimental	0
visual A	frontoparietal_top_20	Null	0.0278368
visual A	frontoparietal_top_25	Experimental	0
visual A	frontoparietal_top_25	Null	0.0368514
visual A	frontoparietal_top_3	Experimental	0.00217437
visual A	frontoparietal_top_3	Null	0.0254039
visual A	frontoparietal_top_5	Experimental	0.000167772
visual A	frontoparietal_top_5	Null	0.0320993
visual A	frontoparietal_top_50	Experimental	8.58182e-05
visual A	frontoparietal_top_50	Null	0.0298014
visual A	medial frontal_top_10	Experimental	0.000110586
visual A	medial frontal_top_10	Null	0.0284433
visual A	medial frontal_top_15	Experimental	0.00293043
visual A	medial frontal_top_15	Null	0.0265775
visual A	medial frontal_top_20	Experimental	5.15742e-05
visual A	medial frontal_top_20	Null	0.0272085
visual A	medial frontal_top_25	Experimental	7.17506e-05
visual A	medial frontal_top_25	Null	0.0302153
visual A	medial frontal_top_3	Experimental	0
visual A	medial frontal_top_3	Null	0.0360286
visual A	medial frontal_top_5	Experimental	0
visual A	medial frontal_top_5	Null	0.0343098
visual A	medial frontal_top_50	Experimental	0.000334759
visual A	medial frontal_top_50	Null	0.0299302
visual A	motor cortex_top_10	Experimental	0
visual A	motor cortex_top_10	Null	0.0303219
visual A	motor cortex_top_15	Experimental	0
visual A	motor cortex_top_15	Null	0.0346566
visual A	motor cortex_top_20	Experimental	0
visual A	motor cortex_top_20	Null	0.0338724
visual A	motor cortex_top_25	Experimental	0
visual A	motor cortex_top_25	Null	0.0424206
visual A	motor cortex_top_3	Experimental	0.0469691
visual A	motor cortex_top_3	Null	0.0291162
visual A	motor cortex_top_5	Experimental	0.000256767
visual A	motor cortex_top_5	Null	0.024476
visual A	motor cortex_top_50	Experimental	0
visual A	motor cortex_top_50	Null	0.0240556
visual A	salience_top_10	Experimental	0.00439309
visual A	salience_top_10	Null	0.025791
visual A	salience_top_15	Experimental	0.00876259
visual A	salience_top_15	Null	0.0277
visual A	salience_top_20	Experimental	0.00176026
visual A	salience_top_20	Null	0.0311119
visual A	salience_top_25	Experimental	0.000438847
visual A	salience_top_25	Null	0.0337157
visual A	salience_top_3	Experimental	0.008912
visual A	salience_top_3	Null	0.0289561
visual A	salience_top_5	Experimental	0.0329495
visual A	salience_top_5	Null	0.0270132
visual A	salience_top_50	Experimental	0.00158786
visual A	salience_top_50	Null	0.034649
visual A	subcortical_top_10	Experimental	0.0178862
visual A	subcortical_top_10	Null	0.0287017
visual A	subcortical_top_15	Experimental	0.00792456
visual A	subcortical_top_15	Null	0.0293967
visual A	subcortical_top_20	Experimental	0.00130293
visual A	subcortical_top_20	Null	0.0359718
visual A	subcortical_top_25	Experimental	0.00391198
visual A	subcortical_top_25	Null	0.0322592
visual A	subcortical_top_3	Experimental	0
visual A	subcortical_top_3	Null	0.0291405
visual A	subcortical_top_5	Experimental	0.0321117
visual A	subcortical_top_5	Null	0.0277337
visual A	subcortical_top_50	Experimental	0.000959633
visual A	subcortical_top_50	Null	0.0272772
visual A	visual A_top_10	Experimental	0.184035
visual A	visual A_top_10	Null	0.0391416
visual A	visual A_top_15	Experimental	0.182505
visual A	visual A_top_15	Null	0.0302168
visual A	visual A_top_20	Experimental	0.133397
visual A	visual A_top_20	Null	0.0353455
visual A	visual A_top_25	Experimental	0.150613
visual A	visual A_top_25	Null	0.0298462
visual A	visual A_top_3	Experimental	0.165295
visual A	visual A_top_3	Null	0.0311353
visual A	visual A_top_5	Experimental	0.237128
visual A	visual A_top_5	Null	0.0327727
visual A	visual A_top_50	Experimental	0.122898
visual A	visual A_top_50	Null	0.0382615
visual A	visual B_top_10	Experimental	0
visual A	visual B_top_10	Null	0.0326667
visual A	visual B_top_15	Experimental	0.00210916
visual A	visual B_top_15	Null	0.030523
visual A	visual B_top_20	Experimental	0.00167999
visual A	visual B_top_20	Null	0.0342578
visual A	visual B_top_25	Experimental	0.00221747
visual A	visual B_top_25	Null	0.0380901
visual A	visual B_top_3	Experimental	0.000407977
visual A	visual B_top_3	Null	0.030225
visual A	visual B_top_5	Experimental	0.000215235
visual A	visual B_top_5	Null	0.0244409
visual A	visual B_top_50	Experimental	3.13581e-05
visual A	visual B_top_50	Null	0.0225497
visual A	visual association_top_10	Experimental	0.0103642
visual A	visual association_top_10	Null	0.0300502
visual A	visual association_top_15	Experimental	0.0005154
visual A	visual association_top_15	Null	0.0305925
visual A	visual association_top_20	Experimental	0.000199452
visual A	visual association_top_20	Null	0.0321124
visual A	visual association_top_25	Experimental	0
visual A	visual association_top_25	Null	0.0338817
visual A	visual association_top_3	Experimental	0.0134039
visual A	visual association_top_3	Null	0.0326001
visual A	visual association_top_5	Experimental	0.00756145
visual A	visual association_top_5	Null	0.031398
visual A	visual association_top_50	Experimental	0
visual A	visual association_top_50	Null	0.0279629
visual B	cerebellum_top_10	Experimental	0.0584357
visual B	cerebellum_top_10	Null	0.0341959
visual B	cerebellum_top_15	Experimental	0.0664496
visual B	cerebellum_top_15	Null	0.0255568
visual B	cerebellum_top_20	Experimental	0.0658799
visual B	cerebellum_top_20	Null	0.026162
visual B	cerebellum_top_25	Experimental	0.0627818
visual B	cerebellum_top_25	Null	0.0219793
visual B	cerebellum_top_3	Experimental	0.00452461
visual B	cerebellum_top_3	Null	0.0268935
visual B	cerebellum_top_5	Experimental	0.0172254
visual B	cerebellum_top_5	Null	0.0222957
visual B	cerebellum_top_50	Experimental	0.0699558
visual B	cerebellum_top_50	Null	0.0256563
visual B	default mode_top_10	Experimental	0.0256927
visual B	default mode_top_10	Null	0.0245215
visual B	default mode_top_15	Experimental	0.0186055
visual B	default mode_top_15	Null	0.0350191
visual B	default mode_top_20	Experimental	0.0228978
visual B	default mode_top_20	Null	0.0334806
visual B	default mode_top_25	Experimental	0.0136823
visual B	default mode_top_25	Null	0.0234084
visual B	default mode_top_3	Experimental	0.00496696
visual B	default mode_top_3	Null	0.0280206
visual B	default mode_top_5	Experimental	0.00566238
visual B	default mode_top_5	Null	0.0320638
visual B	default mode_top_50	Experimental	0.0284576
visual B	default mode_top_50	Null	0.0213526
visual B	frontoparietal_top_10	Experimental	0.0660292
visual B	frontoparietal_top_10	Null	0.0306317
visual B	frontoparietal_top_15	Experimental	0.0594346
visual B	frontoparietal_top_15	Null	0.0299746
visual B	frontoparietal_top_20	Experimental	0.0645926
visual B	frontoparietal_top_20	Null	0.0282654
visual B	frontoparietal_top_25	Experimental	0.0784078
visual B	frontoparietal_top_25	Null	0.0285699
visual B	frontoparietal_top_3	Experimental	0.0689122
visual B	frontoparietal_top_3	Null	0.0329433
visual B	frontoparietal_top_5	Experimental	0.0682792
visual B	frontoparietal_top_5	Null	0.0316284
visual B	frontoparietal_top_50	Experimental	0.0571099
visual B	frontoparietal_top_50	Null	0.0339743
visual B	medial frontal_top_10	Experimental	0.0505442
visual B	medial frontal_top_10	Null	0.0263843
visual B	medial frontal_top_15	Experimental	0.0459043
visual B	medial frontal_top_15	Null	0.0292688
visual B	medial frontal_top_20	Experimental	0.0353836
visual B	medial frontal_top_20	Null	0.0181456
visual B	medial frontal_top_25	Experimental	0.0338003
visual B	medial frontal_top_25	Null	0.028071
visual B	medial frontal_top_3	Experimental	0.0432702
visual B	medial frontal_top_3	Null	0.0228415
visual B	medial frontal_top_5	Experimental	0.0278399
visual B	medial frontal_top_5	Null	0.0317196
visual B	medial frontal_top_50	Experimental	0.0431009
visual B	medial frontal_top_50	Null	0.0258989
visual B	motor cortex_top_10	Experimental	0.0558578
visual B	motor cortex_top_10	Null	0.029688
visual B	motor cortex_top_15	Experimental	0.0373916
visual B	motor cortex_top_15	Null	0.0280302
visual B	motor cortex_top_20	Experimental	0.0392446
visual B	motor cortex_top_20	Null	0.0284787
visual B	motor cortex_top_25	Experimental	0.0417946
visual B	motor cortex_top_25	Null	0.0298006
visual B	motor cortex_top_3	Experimental	0.167798
visual B	motor cortex_top_3	Null	0.0277779
visual B	motor cortex_top_5	Experimental	0.0569073
visual B	motor cortex_top_5	Null	0.0265673
visual B	motor cortex_top_50	Experimental	0.0525781
visual B	motor cortex_top_50	Null	0.027995
visual B	salience_top_10	Experimental	0.0199217
visual B	salience_top_10	Null	0.0270198
visual B	salience_top_15	Experimental	0.0281843
visual B	salience_top_15	Null	0.0351811
visual B	salience_top_20	Experimental	0.0549029
visual B	salience_top_20	Null	0.0310874
visual B	salience_top_25	Experimental	0.0373666
visual B	salience_top_25	Null	0.0263243
visual B	salience_top_3	Experimental	0.0456362
visual B	salience_top_3	Null	0.0345859
visual B	salience_top_5	Experimental	0.0537698
visual B	salience_top_5	Null	0.0342523
visual B	salience_top_50	Experimental	0.0456915
visual B	salience_top_50	Null	0.0313554
visual B	subcortical_top_10	Experimental	0.0174228
visual B	subcortical_top_10	Null	0.0328068
visual B	subcortical_top_15	Experimental	0.0107425
visual B	subcortical_top_15	Null	0.0299569
visual B	subcortical_top_20	Experimental	0.0555234
visual B	subcortical_top_20	Null	0.0201245
visual B	subcortical_top_25	Experimental	0.0361048
visual B	subcortical_top_25	Null	0.0234434
visual B	subcortical_top_3	Experimental	0.0720812
visual B	subcortical_top_3	Null	0.0302576
visual B	subcortical_top_5	Experimental	0.0321199
visual B	subcortical_top_5	Null	0.0269977
visual B	subcortical_top_50	Experimental	0.0245787
visual B	subcortical_top_50	Null	0.0299928
visual B	visual A_top_10	Experimental	0.10844
visual B	visual A_top_10	Null	0.0333576
visual B	visual A_top_15	Experimental	0.11172
visual B	visual A_top_15	Null	0.030836
visual B	visual A_top_20	Experimental	0.0617169
visual B	visual A_top_20	Null	0.0273131
visual B	visual A_top_25	Experimental	0.0435614
visual B	visual A_top_25	Null	0.0269379
visual B	visual A_top_3	Experimental	0.0147397
visual B	visual A_top_3	Null	0.0268602
visual B	visual A_top_5	Experimental	0.0388727
visual B	visual A_top_5	Null	0.023086
visual B	visual A_top_50	Experimental	0.0914545
visual B	visual A_top_50	Null	0.0278247
visual B	visual B_top_10	Experimental	0.203458
visual B	visual B_top_10	Null	0.0228669
visual B	visual B_top_15	Experimental	0.158318
visual B	visual B_top_15	Null	0.0278714
visual B	visual B_top_20	Experimental	0.169524
visual B	visual B_top_20	Null	0.0373126
visual B	visual B_top_25	Experimental	0.173716
visual B	visual B_top_25	Null	0.0270165
visual B	visual B_top_3	Experimental	0.236416
visual B	visual B_top_3	Null	0.0292693
visual B	visual B_top_5	Experimental	0.264155
visual B	visual B_top_5	Null	0.0261046
visual B	visual B_top_50	Experimental	0.158425
visual B	visual B_top_50	Null	0.029397
visual B	visual association_top_10	Experimental	0.0567711
visual B	visual association_top_10	Null	0.0250892
visual B	visual association_top_15	Experimental	0.0368522
visual B	visual association_top_15	Null	0.0307661
visual B	visual association_top_20	Experimental	0.0520102
visual B	visual association_top_20	Null	0.0214935
visual B	visual association_top_25	Experimental	0.0394935
visual B	visual association_top_25	Null	0.0263196
visual B	visual association_top_3	Experimental	0.0140577
visual B	visual association_top_3	Null	0.02939
visual B	visual association_top_5	Experimental	0.0139623
visual B	visual association_top_5	Null	0.0246887
visual B	visual association_top_50	Experimental	0.0381068
visual B	visual association_top_50	Null	0.0256423
visual association	cerebellum_top_10	Experimental	0.00058293
visual association	cerebellum_top_10	Null	0.0312331
visual association	cerebellum_top_15	Experimental	0.0079737
visual association	cerebellum_top_15	Null	0.0338043
visual association	cerebellum_top_20	Experimental	0.0133571
visual association	cerebellum_top_20	Null	0.0270527
visual association	cerebellum_top_25	Experimental	0.00882247
visual association	cerebellum_top_25	Null	0.0301367
visual association	cerebellum_top_3	Experimental	0.000824086
visual association	cerebellum_top_3	Null	0.0282205
visual association	cerebellum_top_5	Experimental	0
visual association	cerebellum_top_5	Null	0.0345949
visual association	cerebellum_top_50	Experimental	0.0336621
visual association	cerebellum_top_50	Null	0.0263143
visual association	default mode_top_10	Experimental	0.126761
visual association	default mode_top_10	Null	0.0362991
visual association	default mode_top_15	Experimental	0.130657
visual association	default mode_top_15	Null	0.0286979
visual association	default mode_top_20	Experimental	0.087258
visual association	default mode_top_20	Null	0.0261761
visual association	default mode_top_25	Experimental	0.0456119
visual association	default mode_top_25	Null	0.0249236
visual association	default mode_top_3	Experimental	0.204779
visual association	default mode_top_3	Null	0.0418547
visual association	default mode_top_5	Experimental	0.15177
visual association	default mode_top_5	Null	0.0270401
visual association	default mode_top_50	Experimental	0.0463676
visual association	default mode_top_50	Null	0.0260918
visual association	frontoparietal_top_10	Experimental	0.067663
visual association	frontoparietal_top_10	Null	0.0379746
visual association	frontoparietal_top_15	Experimental	0.079163
visual association	frontoparietal_top_15	Null	0.0292187
visual association	frontoparietal_top_20	Experimental	0.0788858
visual association	frontoparietal_top_20	Null	0.0273153
visual association	frontoparietal_top_25	Experimental	0.0450542
visual association	frontoparietal_top_25	Null	0.0293514
visual association	frontoparietal_top_3	Experimental	0.017899
visual association	frontoparietal_top_3	Null	0.0304234
visual association	frontoparietal_top_5	Experimental	0.0562458
visual association	frontoparietal_top_5	Null	0.0403261
visual association	frontoparietal_top_50	Experimental	0.0323971
visual association	frontoparietal_top_50	Null	0.0323625
visual association	medial frontal_top_10	Experimental	0.0795792
visual association	medial frontal_top_10	Null	0.0355784
visual association	medial frontal_top_15	Experimental	0.0823937
visual association	medial frontal_top_15	Null	0.0306733
visual association	medial frontal_top_20	Experimental	0.0753532
visual association	medial frontal_top_20	Null	0.0360582
visual association	medial frontal_top_25	Experimental	0.0615262
visual association	medial frontal_top_25	Null	0.0360082
visual association	medial frontal_top_3	Experimental	0.0618834
visual association	medial frontal_top_3	Null	0.0282679
visual association	medial frontal_top_5	Experimental	0.0673514
visual association	medial frontal_top_5	Null	0.0328386
visual association	medial frontal_top_50	Experimental	0.0567737
visual association	medial frontal_top_50	Null	0.0259626
visual association	motor cortex_top_10	Experimental	0.0427816
visual association	motor cortex_top_10	Null	0.0275489
visual association	motor cortex_top_15	Experimental	0.0542859
visual association	motor cortex_top_15	Null	0.0318882
visual association	motor cortex_top_20	Experimental	0.0561342
visual association	motor cortex_top_20	Null	0.0306931
visual association	motor cortex_top_25	Experimental	0.0561634
visual association	motor cortex_top_25	Null	0.0294643
visual association	motor cortex_top_3	Experimental	0.0534452
visual association	motor cortex_top_3	Null	0.0393668
visual association	motor cortex_top_5	Experimental	0.0738066
visual association	motor cortex_top_5	Null	0.0357956
visual association	motor cortex_top_50	Experimental	0.0851071
visual association	motor cortex_top_50	Null	0.0329886
visual association	salience_top_10	Experimental	0.0108035
visual association	salience_top_10	Null	0.0362371
visual association	salience_top_15	Experimental	0.00747954
visual association	salience_top_15	Null	0.039657
visual association	salience_top_20	Experimental	0.000171398
visual association	salience_top_20	Null	0.0407919
visual association	salience_top_25	Experimental	0.00209033
visual association	salience_top_25	Null	0.0345878
visual association	salience_top_3	Experimental	0.014176
visual association	salience_top_3	Null	0.0232528
visual association	salience_top_5	Experimental	0.017607
visual association	salience_top_5	Null	0.0307406
visual association	salience_top_50	Experimental	0.0179051
visual association	salience_top_50	Null	0.0303412
visual association	subcortical_top_10	Experimental	0.0472841
visual association	subcortical_top_10	Null	0.0364792
visual association	subcortical_top_15	Experimental	0.0469441
visual association	subcortical_top_15	Null	0.0377099
visual association	subcortical_top_20	Experimental	0.0385059
visual association	subcortical_top_20	Null	0.0303238
visual association	subcortical_top_25	Experimental	0.0406702
visual association	subcortical_top_25	Null	0.0323213
visual association	subcortical_top_3	Experimental	0.000277675
visual association	subcortical_top_3	Null	0.0368078
visual association	subcortical_top_5	Experimental	9.0056e-05
visual association	subcortical_top_5	Null	0.0318566
visual association	subcortical_top_50	Experimental	0.0475432
visual association	subcortical_top_50	Null	0.0282046
visual association	visual A_top_10	Experimental	0.169288
visual association	visual A_top_10	Null	0.0396437
visual association	visual A_top_15	Experimental	0.0810542
visual association	visual A_top_15	Null	0.0317147
visual association	visual A_top_20	Experimental	0.00948672
visual association	visual A_top_20	Null	0.0332609
visual association	visual A_top_25	Experimental	0.00581373
visual association	visual A_top_25	Null	0.0319516
visual association	visual A_top_3	Experimental	0.00103232
visual association	visual A_top_3	Null	0.0250797
visual association	visual A_top_5	Experimental	0.104823
visual association	visual A_top_5	Null	0.0353133
visual association	visual A_top_50	Experimental	0.0288757
visual association	visual A_top_50	Null	0.0294306
visual association	visual B_top_10	Experimental	0.0428916
visual association	visual B_top_10	Null	0.0372931
visual association	visual B_top_15	Experimental	0.026886
visual association	visual B_top_15	Null	0.0384805
visual association	visual B_top_20	Experimental	0.0492561
visual association	visual B_top_20	Null	0.0278062
visual association	visual B_top_25	Experimental	0.0447007
visual association	visual B_top_25	Null	0.0364995
visual association	visual B_top_3	Experimental	0.0701958
visual association	visual B_top_3	Null	0.0251243
visual association	visual B_top_5	Experimental	0.109412
visual association	visual B_top_5	Null	0.0421822
visual association	visual B_top_50	Experimental	0.0409349
visual association	visual B_top_50	Null	0.0289058
visual association	visual association_top_10	Experimental	0.202203
visual association	visual association_top_10	Null	0.034496
visual association	visual association_top_15	Experimental	0.182994
visual association	visual association_top_15	Null	0.0278743
visual association	visual association_top_20	Experimental	0.1894
visual association	visual association_top_20	Null	0.0323478
visual association	visual association_top_25	Experimental	0.174584
visual association	visual association_top_25	Null	0.0315742
visual association	visual association_top_3	Experimental	0.207099
visual association	visual association_top_3	Null	0.0329234
visual association	visual association_top_5	Experimental	0.178754
visual association	visual association_top_5	Null	0.0340232
visual association	visual association_top_50	Experimental	0.159903
visual association	visual association_top_50	Null	0.0324994

## Sheet: Supplementary Table 8
Selectivity (Self preditive power / Mean other network predictive power)
network	top 3	top 5	top 10	top 25	top 50
visual A	4.66904	6.51433	8.44868	9.57775	9.76176
salience	4.56911	4.2038	4.4189	4.4651	3.90778
default mode	2.97554	3.56606	3.82923	6.33073	5.45099
frontoparietal	3.44263	2.92292	3.33393	2.459	2.07707
subcortical	3.30438	3.88607	3.14698	3.36847	3.13031
visual B	3.51599	4.56388	3.07072	3.09815	2.59944
cerebellum	2.6319	2.58774	2.63939	2.13911	1.75538
visual association	3.2789	2.35246	2.56005	3.59939	2.91013
motor cortex	2.46804	2.44856	1.91464	1.80982	1.62502
medial frontal	2.15135	1.70859	1.85925	1.70834	1.60779
Self Predictive Power
network	top 3	top 5	top 10	top 25	top 50
cerebellum	0.32414	0.307501	0.357298	0.316401	0.272334
medial frontal	0.300929	0.313794	0.356024	0.324387	0.317007
motor cortex	0.27315	0.298817	0.300134	0.285163	0.256331
salience	0.274615	0.256212	0.273903	0.207551	0.144323
subcortical	0.182813	0.274147	0.272397	0.277539	0.217601
frontoparietal	0.263921	0.235812	0.221234	0.145835	0.152108
default mode	0.204775	0.253262	0.215122	0.280652	0.189753
visual B	0.236416	0.264155	0.203458	0.173716	0.158425
visual association	0.207099	0.178754	0.202203	0.174584	0.159903
visual A	0.165295	0.237128	0.184035	0.150613	0.122898
Mean Other Network Predictive Power
network	top 3	top 5	top 10	top 25	top 50
medial frontal	0.139879	0.183657	0.191489	0.189884	0.197169
motor cortex	0.110675	0.122038	0.156758	0.157564	0.15774
cerebellum	0.123158	0.11883	0.135371	0.147913	0.155142
subcortical	0.0553243	0.0705459	0.0865581	0.0823931	0.0695142
visual association	0.0631611	0.075986	0.0789838	0.0485037	0.0549469
frontoparietal	0.0766625	0.0806767	0.0663581	0.0593069	0.073232
visual B	0.0672402	0.0578793	0.0662573	0.0560709	0.0609459
salience	0.0601025	0.0609478	0.0619844	0.0464829	0.0369322
default mode	0.0688194	0.0710201	0.056179	0.0443318	0.0348107
visual A	0.0354023	0.0364011	0.0217827	0.0157253	0.0125898

## Sheet: Supplementary Table 9
network	network_composite_unique_top10	group	pred_power
cerebellum	cerebellum	Experimental	0.187115
cerebellum	cerebellum	Null	0.0350592
cerebellum	default mode	Experimental	0.000914011
cerebellum	default mode	Null	0.0335108
cerebellum	frontoparietal	Experimental	0.162984
cerebellum	frontoparietal	Null	0.0274921
cerebellum	medial frontal	Experimental	0.0238524
cerebellum	medial frontal	Null	0.0318281
cerebellum	motor cortex	Experimental	0.0166134
cerebellum	motor cortex	Null	0.0416742
cerebellum	salience	Experimental	0.0689784
cerebellum	salience	Null	0.0276863
cerebellum	subcortical	Experimental	0
cerebellum	subcortical	Null	0.0322886
cerebellum	visual A	Experimental	0.0298927
cerebellum	visual A	Null	0.0268157
cerebellum	visual B	Experimental	0.012131
cerebellum	visual B	Null	0.0280183
cerebellum	visual association	Experimental	0.00019088
cerebellum	visual association	Null	0.0341235
default mode	cerebellum	Experimental	0
default mode	cerebellum	Null	0.0312374
default mode	default mode	Experimental	0.120991
default mode	default mode	Null	0.0325392
default mode	frontoparietal	Experimental	0.00338246
default mode	frontoparietal	Null	0.0409518
default mode	medial frontal	Experimental	0
default mode	medial frontal	Null	0.0254638
default mode	motor cortex	Experimental	6.71074e-05
default mode	motor cortex	Null	0.0320652
default mode	salience	Experimental	0.000754972
default mode	salience	Null	0.0351783
default mode	subcortical	Experimental	0
default mode	subcortical	Null	0.0347146
default mode	visual A	Experimental	0.000882973
default mode	visual A	Null	0.0293602
default mode	visual B	Experimental	0.0119697
default mode	visual B	Null	0.0342798
default mode	visual association	Experimental	0
default mode	visual association	Null	0.0372495
frontoparietal	cerebellum	Experimental	0
frontoparietal	cerebellum	Null	0.0336591
frontoparietal	default mode	Experimental	0
frontoparietal	default mode	Null	0.0299229
frontoparietal	frontoparietal	Experimental	0.122486
frontoparietal	frontoparietal	Null	0.0378932
frontoparietal	medial frontal	Experimental	0.002894
frontoparietal	medial frontal	Null	0.031934
frontoparietal	motor cortex	Experimental	8.42721e-05
frontoparietal	motor cortex	Null	0.0304106
frontoparietal	salience	Experimental	0.022129
frontoparietal	salience	Null	0.0312215
frontoparietal	subcortical	Experimental	0.00167747
frontoparietal	subcortical	Null	0.0273474
frontoparietal	visual A	Experimental	0.00327182
frontoparietal	visual A	Null	0.0300016
frontoparietal	visual B	Experimental	0.0031137
frontoparietal	visual B	Null	0.0350554
frontoparietal	visual association	Experimental	0.000618726
frontoparietal	visual association	Null	0.0312313
medial frontal	cerebellum	Experimental	0.00345678
medial frontal	cerebellum	Null	0.0272369
medial frontal	default mode	Experimental	0.00136314
medial frontal	default mode	Null	0.0251551
medial frontal	frontoparietal	Experimental	0.00419293
medial frontal	frontoparietal	Null	0.0308287
medial frontal	medial frontal	Experimental	0.242703
medial frontal	medial frontal	Null	0.0278917
medial frontal	motor cortex	Experimental	0
medial frontal	motor cortex	Null	0.0224329
medial frontal	salience	Experimental	0.0862081
medial frontal	salience	Null	0.0247937
medial frontal	subcortical	Experimental	0
medial frontal	subcortical	Null	0.031734
medial frontal	visual A	Experimental	0.0446969
medial frontal	visual A	Null	0.0310033
medial frontal	visual B	Experimental	0.00188977
medial frontal	visual B	Null	0.0222599
medial frontal	visual association	Experimental	0
medial frontal	visual association	Null	0.0286598
motor cortex	cerebellum	Experimental	0.00142914
motor cortex	cerebellum	Null	0.0335205
motor cortex	default mode	Experimental	0.000123949
motor cortex	default mode	Null	0.0343649
motor cortex	frontoparietal	Experimental	0.0901298
motor cortex	frontoparietal	Null	0.0277091
motor cortex	medial frontal	Experimental	0.0242983
motor cortex	medial frontal	Null	0.0331385
motor cortex	motor cortex	Experimental	0.154716
motor cortex	motor cortex	Null	0.0278689
motor cortex	salience	Experimental	0.018065
motor cortex	salience	Null	0.0269993
motor cortex	subcortical	Experimental	0.00656808
motor cortex	subcortical	Null	0.0345979
motor cortex	visual A	Experimental	0.0899908
motor cortex	visual A	Null	0.0270776
motor cortex	visual B	Experimental	0.00523471
motor cortex	visual B	Null	0.0321177
motor cortex	visual association	Experimental	1.13757e-05
motor cortex	visual association	Null	0.0339238
salience	cerebellum	Experimental	0
salience	cerebellum	Null	0.0289891
salience	default mode	Experimental	0.00661759
salience	default mode	Null	0.0345252
salience	frontoparietal	Experimental	0
salience	frontoparietal	Null	0.031554
salience	medial frontal	Experimental	0.000936668
salience	medial frontal	Null	0.0395108
salience	motor cortex	Experimental	6.98854e-05
salience	motor cortex	Null	0.0318213
salience	salience	Experimental	0.17229
salience	salience	Null	0.0350018
salience	subcortical	Experimental	0.0444057
salience	subcortical	Null	0.0284654
salience	visual A	Experimental	0.00212997
salience	visual A	Null	0.0318353
salience	visual B	Experimental	0.00100161
salience	visual B	Null	0.0410823
salience	visual association	Experimental	0.00442831
salience	visual association	Null	0.0327146
subcortical	cerebellum	Experimental	0.00350888
subcortical	cerebellum	Null	0.0318082
subcortical	default mode	Experimental	0.090509
subcortical	default mode	Null	0.025631
subcortical	frontoparietal	Experimental	8.73189e-05
subcortical	frontoparietal	Null	0.0288739
subcortical	medial frontal	Experimental	0.00591497
subcortical	medial frontal	Null	0.0294109
subcortical	motor cortex	Experimental	0.00119256
subcortical	motor cortex	Null	0.0385202
subcortical	salience	Experimental	0.00558369
subcortical	salience	Null	0.0318234
subcortical	subcortical	Experimental	0.281175
subcortical	subcortical	Null	0.0346211
subcortical	visual A	Experimental	0.0807335
subcortical	visual A	Null	0.0376515
subcortical	visual B	Experimental	0.10497
subcortical	visual B	Null	0.0345096
subcortical	visual association	Experimental	0
subcortical	visual association	Null	0.0280781
visual A	cerebellum	Experimental	0
visual A	cerebellum	Null	0.0390607
visual A	default mode	Experimental	0.000484174
visual A	default mode	Null	0.0354851
visual A	frontoparietal	Experimental	0
visual A	frontoparietal	Null	0.031023
visual A	medial frontal	Experimental	0
visual A	medial frontal	Null	0.0356102
visual A	motor cortex	Experimental	0
visual A	motor cortex	Null	0.0303245
visual A	salience	Experimental	0.000129234
visual A	salience	Null	0.0308437
visual A	subcortical	Experimental	0.00584335
visual A	subcortical	Null	0.0316355
visual A	visual A	Experimental	0.125982
visual A	visual A	Null	0.0386957
visual A	visual B	Experimental	0.00139514
visual A	visual B	Null	0.0340174
visual A	visual association	Experimental	0
visual A	visual association	Null	0.0288604
visual B	cerebellum	Experimental	0.000801251
visual B	cerebellum	Null	0.0324614
visual B	default mode	Experimental	0.00204173
visual B	default mode	Null	0.0214317
visual B	frontoparietal	Experimental	0.0347088
visual B	frontoparietal	Null	0.027571
visual B	medial frontal	Experimental	0.0278718
visual B	medial frontal	Null	0.0267358
visual B	motor cortex	Experimental	0.0112632
visual B	motor cortex	Null	0.0302326
visual B	salience	Experimental	0.00508053
visual B	salience	Null	0.0299587
visual B	subcortical	Experimental	0.033436
visual B	subcortical	Null	0.0271655
visual B	visual A	Experimental	0.00752803
visual B	visual A	Null	0.0223146
visual B	visual B	Experimental	0.0973171
visual B	visual B	Null	0.0279918
visual B	visual association	Experimental	0.00189949
visual B	visual association	Null	0.0236083
visual association	cerebellum	Experimental	0.0114052
visual association	cerebellum	Null	0.0361867
visual association	default mode	Experimental	0.00232029
visual association	default mode	Null	0.0279276
visual association	frontoparietal	Experimental	0
visual association	frontoparietal	Null	0.0330445
visual association	medial frontal	Experimental	0.0224003
visual association	medial frontal	Null	0.0306824
visual association	motor cortex	Experimental	0.0162644
visual association	motor cortex	Null	0.0280615
visual association	salience	Experimental	0.0318743
visual association	salience	Null	0.0295254
visual association	subcortical	Experimental	0.00543248
visual association	subcortical	Null	0.0317431
visual association	visual A	Experimental	0.0523143
visual association	visual A	Null	0.0303174
visual association	visual B	Experimental	0.122405
visual association	visual B	Null	0.0360384
visual association	visual association	Experimental	0.128834
visual association	visual association	Null	0.0265953

## Sheet: Supplementary Table 10
﻿Code	ItemID	Network
Q1	bsi_31	whole brain, salience
Q2	atq_31	cerebellum
Q3	atq_46	default mode
Q4	atq_76	whole brain, frontoparietal
Q5	brief_12	whole brain, medial frontal
Q6	iri_6	motor cortex
Q7	bsi_1	salience
Q8	brief_5	subcortical
Q9	atq_18	visual A
Q10	iri_2	visual B
Q11	brief_64	visual association
Q12	iri_17	cerebellum
Q13	atq_33	default mode
Q14	atq_45	frontoparietal, motor cortex, visual B
Q15	bsi_50	medial frontal
Q16	pss_9	motor cortex
Q17	panas_14	subcortical
Q18	atq_12	visual A
Q19	atq_25	visual B
Q20	brief_40	visual association
Q21	bsi_6	cerebellum
Q22	atq_47	default mode
Q23	atq_56	frontoparietal
Q24	bsi_32	frontoparietal
Q25	bsi_35	medial frontal, salience
Q26	psqi_3	subcortical
Q27	atq_30	visual A
Q28	panas_11	visual association
Q29	brief_42	whole brain, default mode, salience, visual A
Q30	panas_51	cerebellum
Q31	atq_7	motor cortex
Q32	bsi_53	medial frontal
Q33	bsi_17	medial frontal
Q34	bsi_42	salience, visual B
Q35	brief_20	subcortical
Q36	brief_53	visual B
Q37	brief_24	visual association
Q38	bsi_18	whole brain
Q39	atq_65	cerebellum
Q40	atq_58	default mode
Q41	bsi_14	frontoparietal
Q42	brief_68	motor cortex
Q43	iri_15	subcortical
Q44	atq_55	visual A
Q45	panas_15	visual association

[truncated: 1 more sheets: Supplementary Table 11]
